# Supplementary material for: Cascade synthesis of indolizines and pyrrolo[1,2-a]pyrazines from 2-formyl-1-propargylpyrroles
Source: Royal Society of Chemistry journal article supplement (doi:10.1039/d1ob01839f), 2021-11-30
Supplement: d1ob01839f1.pdf [file d1ob01839f1.pdf]

# Cascade synthesis of indolizines and pyrrolo[1,2-*a*]pyrazines from 2-formyl-1-propargylpyrroles

Carlos H. Escalante,<sup>a</sup> Fernando A. Carmona-Hernández,<sup>a</sup> Alberto Hernández-López,<sup>a</sup>  
Eder I. Martínez-Mora,<sup>a,b</sup> Francisco Delgado<sup>a</sup> and Joaquín Tamariz\*<sup>a</sup>

<sup>a</sup> *Departamento de Química Orgánica, Escuela Nacional de Ciencias Biológicas,  
Instituto Politécnico Nacional, Prolongación de Carpio y Plan de Ayala S/N, 11340 Mexico City,  
Mexico.*

*E-mail: [jtamarizm@gmail.com](mailto:jtamarizm@gmail.com); [jtamarizm@ipn.mx](mailto:jtamarizm@ipn.mx)*

<sup>b</sup> *Departamento de Química Orgánica, Facultad de Ciencias Químicas, Universidad Autónoma de  
Coahuila, Blvd. Venustiano Carranza e Ing. J. Cárdenas S/N, 25280 Saltillo, Coah., Mexico.*

## SUPPLEMENTARY INFORMATION

|                                                                           |                |
|---------------------------------------------------------------------------|----------------|
| <b>1. Experimental Section.</b>                                           | <b>S2-S18</b>  |
| <b>2. <sup>1</sup>H and <sup>13</sup>C NMR spectra for new compounds.</b> | <b>S19-S81</b> |

## 1. Experimental Section

### General

Melting points were determined on a Krüss KSP 1N capillary melting point apparatus. IR spectra were recorded on a Perkin-Elmer 2000 spectrophotometer.  $^1\text{H}$  and  $^{13}\text{C}$  NMR spectra were captured on Varian Mercury (300 MHz), Varian VNMR (500 MHz), Bruker 600AVANCE III (600 MHz) and Bruker Ascend (750 MHz) instruments, with  $\text{CDCl}_3$  as the solvent and TMS as internal standard. Signal assignments were based on 2D NMR spectra (HMOC, HMBC and ROESY). Mass spectra (MS) were recorded on Thermo Polaris Q-Trace GC Ultra and Hewlett-Packard 5971A spectrometers. High-resolution mass spectra (HRMS) were obtained (in electron impact mode) on a Jeol JSM-GCMateII spectrometer. Analytical thin-layer chromatography was carried out with E. Merck silica gel 60 F254 coated 0.25 plates, visualized by using a long- and short-wavelength UV lamp. Flash column chromatography was performed over Natland International Co. silica gel (230-400 mesh). All air moisture sensitive reactions were conducted under  $\text{N}_2$  with oven-dried glassware. Triethylamine (TEA) was distilled on NaOH. Before their application, THF and toluene were freshly distilled over sodium, as were DMF, DMAc, and  $\text{CH}_2\text{Cl}_2$  over  $\text{CaH}_2$ . MeOH and EtOH were distilled over sodium.  $\text{K}_2\text{CO}_3$  was dried overnight at 200 °C prior to use. All other reagents were employed without further purification.

**1-(Propa-1,2-dien-1-yl)-1H-pirrole-2-carbaldehyde (5).**<sup>1</sup> Method A: In a threaded ACE glass pressure tube equipped with a sealed Teflon screw cap and a magnetic stirring bar, a mixture of **2a** (0.100 g, 0.75 mmol) and sodium hydride (0.057 g, 2.37 mmol) in dry DMF (2.0 mL) and under  $\text{N}_2$  atmosphere was heated at 0 °C for 1 h. The mixture was extracted with hexane/EtOAc (1:1, 40 mL) and washed with water (2 x 20 mL). The organic layer was dried ( $\text{Na}_2\text{SO}_4$ ), the solvent removed under vacuum, and the residue purified by column chromatography over silica gel (30 g/g crude, hexane/EtOAc, 99:1) to provide **5** (0.09 g, 90%) as a yellow oil.

Method B: To a solution of **1** (0.300 g, 3.15 mmol) in dry DMF (6.0 mL) at 0 °C and under  $\text{N}_2$ , NaH (60%, 0.189 g, 4.73 mmol) was added. The mixture was stirred at 0 °C for 15 min, then propargyl bromide (0.450 g, 3.78 mmol) was added dropwise, and stirring continued at 0 °C for 4 h. Hexane/EtOAc (1:1, 60 mL) was added, the mixture washed with water (2 x 30 mL), the organic layer dried ( $\text{Na}_2\text{SO}_4$ ) and the solvent removed under vacuum. The residue was purified by column chromatography over silica gel (20 g/g crude, hexane) to give **5** (0.197 g, 47%) as a yellow oil.  $R_f$  0.66 (hexane/EtOAc, 7:3). IR (film):  $\bar{\nu}$  2923, 2853, 1666, 1470, 1417, 1371, 1305, 738  $\text{cm}^{-1}$ .  $^1\text{H}$  NMR (300

MHz, CDCl<sub>3</sub>):  $\delta$  5.52 (d,  $J$  = 6.6 Hz, 2H, H-3'), 6.31 (dd,  $J$  = 3.9, 2.6 Hz, 1H, H-4), 6.98 (dd,  $J$  = 3.9, 1.8 Hz, 1H, H-3), 7.20-7.24 (m, 1H, H-5), 8.14 (t,  $J$  = 6.6 Hz, 1H, H-1'), 9.66 (d,  $J$  = 1.2 Hz, 1H, CHO). <sup>13</sup>C NMR (75.4 MHz, CDCl<sub>3</sub>):  $\delta$  87.4 (C-3'), 98.5 (C-1'), 111.3 (C-4), 125.4 (C-3), 127.9 (C-5), 130.64 (C-2), 179.7 (CHO), 202.7 (C-2'). MS (70 eV):  $m/z$  133 (M<sup>+</sup>, 100), 104 (84), 78 (19), 65 (3), 51 (8).

**1-(Prop-2-ynyl)-1H-pyrrole-2-carbaldehyde (2a).**<sup>1-3</sup> To a solution of **1** (0.300 g, 3.15 mmol) in dry DMF (6.0 mL) at 0 °C and under N<sub>2</sub>, NaH (60%, 0.138 g, 3.30 mmol) was added. The mixture was stirred at 0 °C for 15 min, then propargyl bromide (0.450 g, 3.78 mmol) was added dropwise, and stirring continued at 0 °C for 4 h. Subsequently, hexane/EtOAc (1:1, 60 mL) was added, the mixture washed with water (2 x 30 mL), the organic layer dried (Na<sub>2</sub>SO<sub>4</sub>), and the solvent removed under vacuum. The residue was purified by column chromatography over silica gel (20 g/g crude, hexane) to obtain **2a** (0.399 g, 95%) as a yellow oil.  $R_f$  0.65 (hexane/EtOAc, 7:3). IR (film):  $\bar{\nu}$  3289, 1660, 1529, 1477, 1405, 1370, 1338, 1315, 1219, 1076, 1031, 747 cm<sup>-1</sup>. <sup>1</sup>H NMR (500 MHz, CDCl<sub>3</sub>):  $\delta$  2.49 (t,  $J$  = 2.6 Hz, 1H, H-3'), 5.19 (d,  $J$  = 2.6 Hz, 2H, H-1'), 6.27 (dd,  $J$  = 4.2, 2.7 Hz, 1H, H-4), 6.96 (dd,  $J$  = 4.2, 1.8 Hz, 1H, H-3), 7.24-7.27 (m, 1H, H-5), 9.54 (d,  $J$  = 1.2 Hz, 1H, CHO). <sup>13</sup>C NMR (125 MHz, CDCl<sub>3</sub>):  $\delta$  38.0 (C-1'), 74.3 (C-3'), 77.4 (C-2'), 110.0 (C-4), 124.9 (C-3), 130.3 (C-5), 130.9 (C-2), 179.4 (CHO). MS (70 eV):  $m/z$  133 (M<sup>+</sup>, 47), 104 (100), 78 (40), 65 (12), 51 (34).

**1-(3-Phenylprop-2-yn-1-yl)-1H-pyrrole-2-carbaldehyde (2b).**<sup>2,3</sup> In a threaded ACE glass pressure tube equipped with a sealed Teflon screw cap and a magnetic stirring bar, a mixture of **2a** (0.200 g, 1.50 mmol), iodobenzene (0.386 g, 1.65 mmol), Pd(PPh<sub>3</sub>)<sub>4</sub> (0.035 g, 0.03 mmol), CuI (0.011 g, 0.06 mmol), and K<sub>2</sub>CO<sub>3</sub> (1.035 mmol, 7.50 mmol) in dry DMF (2.0 mL) was heated at 60 °C for 4 h. The mixture was diluted with aqueous HCl (5%, 10 mL) and extracted twice with hexane/EtOAc (1:1, 2 x 40 mL). The organic layer was dried (Na<sub>2</sub>SO<sub>4</sub>) and the solvent removed under vacuum. The residue was purified by column chromatography over silica gel (20 g/g crude, hexane/EtOAc, 98:2) to afford **2b** (0.226 g, 72%) as a pale yellow solid.  $R_f$  0.67 (hexane/EtOAc, 7:3); mp 55–56 °C [Lit.<sup>2</sup> 58-60 °C]. IR (film):  $\bar{\nu}$  2810, 1662, 1529, 1478, 1406, 1370, 1337, 1314, 1217, 1074, 1030, 789, 756, 691 cm<sup>-1</sup>. <sup>1</sup>H NMR (500 MHz, CDCl<sub>3</sub>):  $\delta$  5.43 (s, 2H, H-1'), 6.30 (dd,  $J$  = 4.0, 2.5 Hz, 1H, H-4), 6.98 (dd,  $J$  = 4.0, 1.5 Hz, 1H, H-3), 7.30-7.35 (m, 3H, H-3", H-4"), 7.37 (br s, 1H, H-5), 7.43-7.47 (m, 2H, H-2"), 9.58 (d,  $J$  = 1.0 Hz, 1H, CHO). <sup>13</sup>C NMR (125 MHz, CDCl<sub>3</sub>):  $\delta$  39.0 (C-1'), 82.7 (C-2'), 86.1 (C-3'), 110.0 (C-4), 122.1 (C-1"), 125.0 (C-3), 128.3 (C-3"), 128.7 (C-4"), 130.4 (C-5), 131.0 (C-2), 131.8 (C-2"), 179.5 (CHO). HRMS (EI):  $m/z$  [M<sup>+</sup>] calcd for C<sub>14</sub>H<sub>11</sub>NO: 209.0841; found: 209.0841.

**1-(3-(*p*-Tolyl)prop-2-yn-1-yl)-1*H*-pyrrole-2-carbaldehyde (2c).** Following the method of preparation for **2b**, a mixture of **2a** (0.200 g, 1.50 mmol), 4-iodotoluene (0.360 g, 1.65 mmol), Pd(PPh<sub>3</sub>)<sub>4</sub> (0.035 g, 0.03 mmol), CuI (0.011 g, 0.06 mmol), and K<sub>2</sub>CO<sub>3</sub> (1.035 mmol, 7.50 mmol) in dry DMF was heated at 60 °C for 4 h to produce **2c** (0.235 g, 70%) as a brown solid. *R*<sub>f</sub> 0.70 (hexane/EtOAc, 7:3); mp 45–46 °C. IR (film):  $\bar{\nu}$  2922, 2808, 1661, 1509, 1479, 1406, 1369, 1337, 1314, 1289, 1216, 1074, 1031, 817, 746 cm<sup>-1</sup>. <sup>1</sup>H NMR (500 MHz, CDCl<sub>3</sub>):  $\delta$  2.34 (s, 3H, CH<sub>3</sub>), 5.41 (s, 2H, H-1'), 6.29 (ddd, *J* = 4.0, 3.0, 1.5 Hz, 1H, H-4), 6.97 (dt, *J* = 4.0, 1.0 Hz, 1H, H-3), 7.12 (br d, *J* = 7.7 Hz, 2H, H-3''), 7.34 (br d, *J* = 7.7 Hz, 2H, H-2''), 7.37 (br s, 1H, H-5), 9.58 (d, *J* = 1.0 Hz, 1H, CHO). <sup>13</sup>C NMR (125 MHz, CDCl<sub>3</sub>):  $\delta$  21.3 (CH<sub>3</sub>), 39.0 (C-1'), 81.9 (C-2'), 86.1 (C-3'), 109.8 (C-4), 119.0 (C-1''), 124.7 (C-3), 129.0 (C-3''), 130.4 (C-5), 131.1 (C-2), 131.6 (C-2''), 138.7 (C-4''), 179.3 (CHO). HRMS (EI): *m/z* [M<sup>+</sup>] calcd for C<sub>15</sub>H<sub>13</sub>NO: 223.0997; found: 223.0993.

**1-(3-(4-Methoxyphenyl)prop-2-yn-1-yl)-1*H*-pyrrole-2-carbaldehyde (2d).**<sup>2</sup> Following the method of preparation for **2b**, a mixture of **2a** (0.200 g, 1.50 mmol), 4-iodoanisole (0.386 g, 1.65 mmol), Pd(PPh<sub>3</sub>)<sub>4</sub> (0.035 g, 0.03 mmol), CuI (0.011 g, 0.06 mmol), and K<sub>2</sub>CO<sub>3</sub> (1.035 g, 7.50 mmol) in dry DMF (2 mL) was heated at 60 °C for 4 h, resulting in **2d** (0.216 g, 60%) as a brown solid. *R*<sub>f</sub> 0.62 (hexane/EtOAc, 7:3); mp 71–72 °C [Lit.<sup>2</sup> 69–71 °C]. IR (film):  $\bar{\nu}$  2927, 2837, 1662, 1606, 1509, 1405, 1338, 1290, 1250, 1216, 1174, 1074, 1032, 833, 747 cm<sup>-1</sup>. <sup>1</sup>H NMR (500 MHz, CDCl<sub>3</sub>):  $\delta$  3.81 (s, 3H, OCH<sub>3</sub>), 5.40 (s, 2H, H-1'), 6.29 (dd, *J* = 4.0, 2.5 Hz, 1H, H-4), 6.82–6.86 (m, 2H, H-3''), 6.98 (dd, *J* = 4.0, 2.0 Hz, 1H, H-3), 7.36–7.40 (m, 3H, H-2'', H-5), 9.57 (d, *J* = 1.0 Hz, 1H, CHO). <sup>13</sup>C NMR (125 MHz, CDCl<sub>3</sub>):  $\delta$  39.1 (C-1'), 55.3 (OCH<sub>3</sub>), 81.2 (C-2'), 86.1 (C-3'), 109.9 (C-4), 113.9 (C-3''), 114.1 (C-1''), 124.9 (C-3), 130.4 (C-5), 131.0 (C-2), 133.3 (C-2''), 159.8 (C-4''), 179.5 (CHO). HRMS (EI): *m/z* [M<sup>+</sup>] calcd for C<sub>15</sub>H<sub>13</sub>NO<sub>2</sub>: 239.0946; found: 239.0948.

**1-(3-(4-Formylphenyl)prop-2-yn-1-yl)-1*H*-pyrrole-2-carbaldehyde (2e).** In a threaded ACE glass pressure tube equipped with a sealed Teflon screw cap and a magnetic stirring bar, a mixture of **2a** (0.200 g, 1.50 mmol), 4-bromobenzaldehyde (0.278 g, 1.50 mmol) and PdCl<sub>2</sub>(PPh<sub>3</sub>)<sub>2</sub> (0.042 g, 0.06 mmol) in dry TEA (1.0 mL) was stirred at 80 °C for 1 h. The mixture was diluted with aqueous HCl (5%, 10 mL) and extracted with hexane/EtOAc (1:1, 2 x 40 mL). The organic layer was dried (Na<sub>2</sub>SO<sub>4</sub>) and the solvent removed under vacuum. The residue was purified by column chromatography over silica gel (20 g/g crude, hexane/EtOAc, 98:2) to furnish **2e** (0.197 g, 55%) as a pale yellow solid. *R*<sub>f</sub> 0.50 (hexane/EtOAc, 7:3); mp 90–92 °C. IR (film):  $\bar{\nu}$  3108, 2811, 1701, 1658, 1603, 1405, 1335, 1311, 1288, 1207, 1167, 1076, 831, 788, 744 cm<sup>-1</sup>. <sup>1</sup>H NMR (500 MHz, CDCl<sub>3</sub>):  $\delta$  5.46 (s, 2H, H-1'), 6.31 (dd, *J* = 4.0, 3.0 Hz, H-4), 6.99 (dd, *J* = 4.0, 1.5 Hz, 1H, H-3), 7.30 (br s, 1H, H-5), 7.58 (br d, *J* = 8.3

H<sub>z</sub>, 2H, H-2"), 7.83 (br d,  $J = 8.3$  Hz, 2H, H-3"), 9.59 (s, 1H, CHO), 10.00 (s, 1H, ArCHO). <sup>13</sup>C NMR (125 MHz, CDCl<sub>3</sub>): δ 38.8 (C-1'), 84.8 (C-3'), 86.9 (C-2'), 110.3 (C-4), 125.0 (C-3), 128.4 (C-1"), 129.5 (C-3"), 130.4 (C-5), 131.1 (C-2), 132.3 (C-2"), 135.8 (C-4"), 179.6 (CHO), 191.3 (ArCHO). HRMS (EI):  $m/z$  [ $M^+$ ] calcd for C<sub>15</sub>H<sub>11</sub>NO<sub>2</sub>: 237.0790; found: 237.0791.

**1-(3-(4-Acetylphenyl)prop-2-yn-1-yl)-1H-pyrrole-2-carbaldehyde (2f).** Following the method of preparation for **2e**, a mixture of **2a** (0.200 g, 1.50 mmol), 1-(4-bromophenyl)ethan-1-one (0.299 g, 1.50 mmol) and PdCl<sub>2</sub>(PPh<sub>3</sub>)<sub>2</sub> (0.042 g, 0.06 mmol) in dry TEA (1.0 mL) was heated at 60 °C for 2 h to obtain **2f** (0.204 g, 54%) as a pale yellow solid.  $R_f$  0.38 (hexane/EtOAc, 8:2); mp 63–65 °C. IR (film):  $\bar{\nu}$  3112, 2808, 1683, 1661, 1602, 1404, 1264, 1075, 838, 764, 749 cm<sup>-1</sup>. <sup>1</sup>H NMR (500 MHz, CDCl<sub>3</sub>): δ 2.59 (s, 3H, COCH<sub>3</sub>), 5.46 (s, 2H, H-1'), 6.31 (dd,  $J = 4.0, 2.5$  Hz, 1H, H-4), 6.99 (dd,  $J = 4.0, 1.5$  Hz, 1H, H-3), 7.30-7.32 (m, 1H, H-5), 7.55-7.49 (m, 2H, H-2"), 7.92-7.88 (m, 2H, H-3"), 9.59 (d,  $J = 1.0$  Hz, 1H, CHO). <sup>13</sup>C NMR (125 MHz, CDCl<sub>3</sub>): δ 26.6 (COCH<sub>3</sub>), 38.8 (C-1'), 85.0 (C-3'), 86.1 (C-2'), 110.2 (C-4), 124.9 (C-3), 127.0 (C-1"), 128.2 (C-3"), 130.4 (C-5), 131.1 (C-2), 131.9 (C-2"), 136.6 (C-4"), 179.6 (CHO), 197.2 (COCH<sub>3</sub>). HRMS (EI):  $m/z$  [ $M^+$ ] calcd for C<sub>16</sub>H<sub>13</sub>NO<sub>2</sub>: 251.0946; found: 251.0946.

**1-(3-(3-Methoxyphenyl)prop-2-yn-1-yl)-1H-pyrrole-2-carbaldehyde (2g).** Following the method of preparation for **2b**, a mixture of **2a** (0.200 g, 1.50 mmol), 3-iodoanisole (0.386 g, 1.65 mmol), Pd(PPh<sub>3</sub>)<sub>4</sub> (0.035 g, 0.03 mmol), CuI (0.011 g, 0.06 mmol), and K<sub>2</sub>CO<sub>3</sub> (1.035 mmol, 7.50 mmol) in dry DMF was heated at 60 °C for 4 h to yield **2g** (0.230 g, 64%) as a yellow oil.  $R_f$  0.62 (hexane/EtOAc, 7:3). IR (film):  $\bar{\nu}$  2937, 2834, 1661, 1597, 1575, 1479, 1404, 1337, 1316, 1289, 1204, 1164, 1074, 1042, 784, 745, 686 cm<sup>-1</sup>. <sup>1</sup>H NMR (500 MHz, CDCl<sub>3</sub>): δ 3.78 (s, 3H, OCH<sub>3</sub>), 5.42 (s, 2H, H-1'), 6.30 (dd,  $J = 4.0, 2.5$  Hz, 1H, H-4), 6.89 (ddd,  $J = 8.5, 3.0, 1.0$  Hz, 1H, H-4"), 6.96-6.98 (m, 1H, H-2"), 6.98 (dd,  $J = 4.0, 1.5$  Hz, 1H, H-3), 7.04 (dt,  $J = 7.5, 1.5$  Hz, 1H, H-6"), 7.22 (dd,  $J = 8.5, 7.5$  Hz, 1H, H-5"), 7.36 (br s, 1H, H-5), 9.57 (d,  $J = 1.0$  Hz, 1H, CHO). <sup>13</sup>C NMR (125 MHz, CDCl<sub>3</sub>): δ 38.9 (C-1'), 55.2 (OCH<sub>3</sub>), 82.5 (C-2'), 85.9 (C-3'), 110.0 (C-4), 115.3 (C-4"), 116.6 (C-2"), 123.1 (C-1"), 124.3 (C-6"), 125.0 (C-3), 129.4 (C-5"), 130.4 (C-5), 131.1 (C-2), 159.2 (C-3"), 179.5 (CHO). HRMS (EI):  $m/z$  [ $M^+$ ] calcd for C<sub>15</sub>H<sub>13</sub>NO<sub>2</sub>: 239.0946; found: 239.0943.

**1-(3-(3-Nitrophenyl)prop-2-yn-1-yl)-1H-pyrrole-2-carbaldehyde (2h).**<sup>2</sup> Following the method of preparation for **2b**, a mixture of **2a** (0.200 g, 1.50 mmol), 1-iodo-3-nitrobenzene (0.411 g, 1.65 mmol), PdCl<sub>2</sub>(PPh<sub>3</sub>)<sub>2</sub> (0.021 g, 0.03 mmol), and CuI (0.011 g, 0.06 mmol) in dry TEA (1.515 g, 15.00 mmol) was stirred at 80 °C for 1 h to provide **2h** (0.328 g, 86%) as a pale yellow solid.  $R_f$  0.62

(hexane/EtOAc, 7:3); mp 84-86 °C [Lit.<sup>2</sup> 107-108 °C]. IR (film):  $\bar{\nu}$  3084, 2813, 1662, 1529, 1478, 1405, 1351, 1315, 1218, 1076, 1031, 874, 808, 753, 736, 674 cm<sup>-1</sup>. <sup>1</sup>H NMR (500 MHz, CDCl<sub>3</sub>):  $\delta$  5.46 (s, 2H, H-1'), 6.31-6.34 (m, 1H, H-4), 7.00 (dt,  $J = 4.0, 1.5$  Hz, 1H, H-3), 7.27-7.30 (m, 1H, H-5), 7.50 (t,  $J = 8.3$  Hz, 1H, H-5''), 7.74 (dt,  $J = 8.3, 1.5$  Hz, 1H, H-6''), 8.18 (dm,  $J = 8.3$  Hz 1H, H-4''), 8.28 (br s, 1H, H-2''), 9.59 (d,  $J = 1.0$  Hz, 1H, CHO). <sup>13</sup>C NMR (125 MHz, CDCl<sub>3</sub>):  $\delta$  38.7 (C-1'), 83.2 (C-3'), 85.7 (C-2'), 110.4 (C-4), 123.4 (C-4''), 123.9 (C-1''), 125.1 (C-3), 126.6 (C-2''), 129.4 (C-5''), 130.5 (C-5), 131.1 (C-2), 137.5 (C-6''), 148.0 (C-3''), 179.7 (CHO). HRMS (EI):  $m/z$  [ $M^+$ ] calcd for C<sub>14</sub>H<sub>10</sub>N<sub>2</sub>O<sub>3</sub>: 254.0692; found: 254.0701.

**1-(3-(3-Formylphenyl)prop-2-yn-1-yl)-1H-pyrrole-2-carbaldehyde (2i).** Following the method of preparation for **2e**, a mixture of **2a** (0.200 g, 1.50 mmol), 3-bromobenzaldehyde (0.278 g, 1.50 mmol), and PdCl<sub>2</sub>(PPh<sub>3</sub>)<sub>2</sub> (0.42 g, 0.06 mmol) in dry TEA (1.0 mL) was stirred at 80 °C for 1 h to give **2i** (0.147 g, 41%) as a yellow oil.  $R_f$  0.48 (hexane/EtOAc, 7:3). IR (film):  $\bar{\nu}$  2932, 1713, 1506, 1383, 1261, 1209, 1160, 1029, 804, 734, 701 cm<sup>-1</sup>. <sup>1</sup>H NMR (600 MHz, CDCl<sub>3</sub>):  $\delta$  5.45 (s, 2H, H-1'), 6.31 (dd,  $J = 3.9, 2.4$  Hz, 1H, H-4), 6.99 (dd,  $J = 3.9, 1.2$  Hz, 1H, H-3), 7.32 (br s, 1H, H-5), 7.50 (t,  $J = 7.8$  Hz, 1H, H-5''), 7.68 (d,  $J = 7.8$  Hz, 1H, H-6''), 7.84 (d,  $J = 7.8$  Hz, 1H, H-4''), 7.94 (s, 1H, H-2''), 9.59 (s, 1H, CHO), 9.98 (s, 1H, PhCHO). <sup>13</sup>C NMR (150 MHz, CDCl<sub>3</sub>):  $\delta$  38.8 (C-1'), 84.3 (C-3'), 84.5 (C-2'), 110.2 (C-4), 123.3 (C-1''), 125.0 (C-3), 129.1 (C-5''), 129.4 (C-4''), 130.4 (C-5), 131.0 (C-2), 133.0 (C-2''), 136.3 (C-3''), 137.3 (C-6''), 179.6 (CHO), 191.3 (PhCHO). HRMS (EI):  $m/z$  [ $M^+$ ] calcd for C<sub>15</sub>H<sub>11</sub>NO<sub>2</sub>: 237.0790; found: 237.0786.

**1-(3-(3-Fluorophenyl)prop-2-yn-1-yl)-1H-pyrrole-2-carbaldehyde (2j).** Following the method of preparation for **2b**, a mixture of **2a** (0.200 g, 1.50 mmol), 3-fluoro-1-iodobenzene (0.366 g, 1.65 mmol), Pd(PPh<sub>3</sub>)<sub>4</sub> (0.035 g, 0.03 mmol), CuI (0.011 g, 0.06 mmol), and K<sub>2</sub>CO<sub>3</sub> (1.035 mmol, 7.50 mmol) in dry DMF was heated at 60 °C for 2 h to produce **2j** (0.250 g, 73%) as a reddish oil.  $R_f$  0.69 (hexane/EtOAc, 8:2). IR (film):  $\bar{\nu}$  3112, 3072, 2812, 1661, 1609, 1582, 1486, 1406, 1338, 1218, 1173, 1152, 874, 786, 747, 682 cm<sup>-1</sup>. <sup>1</sup>H NMR (500 MHz, CDCl<sub>3</sub>):  $\delta$  5.42 (s, 2H, H-1'), 6.30 (dd,  $J = 4.0, 2.5$  Hz, 1H, H-4), 6.97 (dd,  $J = 4.0, 1.7$  Hz, 1H, H-3), 7.03 (tdd,  $J = 8.5, 2.5, 1.0$  Hz, 1H, H-4''), 7.13 (ddd,  $J = 9.3, 2.5, 1.5$  Hz, 1H, H-2''), 7.21 (dt,  $J = 7.8, 1.2$  Hz, 1H, H-6''), 7.27 (td,  $J = 7.8, 5.8$  Hz, 1H, H-5''), 7.31 (br s, 1H, H-5), 9.58 (d,  $J = 1.0$  Hz, 1H, CHO). <sup>13</sup>C NMR (125 MHz, CDCl<sub>3</sub>):  $\delta$  38.8 (C-1'), 83.8 (C-2'), 84.6 (d,  $J_{C,F} = 3.3$  Hz, C-3'), 110.1 (C-4), 116.0 (d,  $J_{C,F} = 21.0$  Hz, C-4''), 118.6 (d,  $J_{C,F} = 22.8$  Hz, C-2''), 123.9 (d,  $J_{C,F} = 9.3$  Hz, C-1''), 124.9 (C-3), 127.6 (d,  $J_{C,F} = 3.1$  Hz, C-6''), 129.8 (d,  $J_{C,F} = 8.5$  Hz, C-5''), 130.3 (C-5), 131.1 (C-2), 162.2 (d,  $J_{C,F} = 246.9$  Hz, C-3''), 179.5 (CHO). HRMS (EI):  $m/z$  [ $M^+$ ] calcd for C<sub>14</sub>H<sub>10</sub>NOF: 227.0746; found: 227.0747.

**(E)-2-(2-Nitrovinyl)-1-(prop-2-yn-1-yl)-1H-pyrrole (2k).** In a threaded ACE glass pressure tube equipped with a sealed Teflon screw cap and a magnetic stirring bar, a mixture of **2a** (0.100 g, 0.75 mmol), **3a** (0.229 g, 3.76 mmol), and NH<sub>4</sub>OAc (0.058 g, 0.75 mmol) in dry toluene (0.5 mL) was heated at 100 °C for 20 h. The mixture was diluted with an aqueous saturated solution of NaHCO<sub>3</sub> (10 mL) and extracted twice with CH<sub>2</sub>Cl<sub>2</sub> (2 x 40 mL). The organic layer was dried (Na<sub>2</sub>SO<sub>4</sub>) and the solvent removed under vacuum. The residue was purified by column chromatography over silica gel (20 g/g crude, hexane/EtOAc, 9:1) to afford **2k** (0.115 g, 87%) as a reddish solid. *Rf* 0.40 (hexane/EtOAc, 8:2); mp 107–109 °C. IR (film):  $\bar{\nu}$  3294, 3120, 2970, 1661, 1615, 1471, 1307, 1268, 1245, 1202, 1126, 1079, 947, 816, 745, 733, 673 cm<sup>-1</sup>. <sup>1</sup>H NMR (600 MHz, CDCl<sub>3</sub>):  $\delta$  2.54 (t, *J* = 2.6 Hz, 1H, H-3'), 4.81 (d, *J* = 2.6 Hz, 2H, H-1'), 6.31 (ddd, *J* = 4.0, 2.7, 0.6 Hz, 1H, H-4), 6.83 (dd, *J* = 4.0, 1.3 Hz, 1H, H-3), 7.11 (dd, *J* = 2.7, 1.3 Hz, 1H, H-5), 7.49 (d, *J* = 13.2 Hz, 1H, H-2"), 8.05 (d, *J* = 13.2 Hz, 1H, H-1"). <sup>13</sup>C NMR (150 MHz, CDCl<sub>3</sub>):  $\delta$  37.2 (C-1'), 75.3 (C-3'), 76.5 (C-2'), 111.4 (C-4), 116.6 (C-3), 124.2 (C-2), 126.8 (C-1"), 129.2 (C-5), 132.4 (C-2"). HRMS (ED): *m/z* [M<sup>+</sup>] calcd for C<sub>9</sub>H<sub>8</sub>N<sub>2</sub>O<sub>2</sub>: 176.0586; found: 176.0589.

**6-(4-Methoxybenzyl)-7-nitroindolizine (4d).** Following the method of preparation for **4b**, a mixture of **2d** (0.060 g, 0.25 mmol), DBU (0.088 g, 0.58 mmol), and **3a** (0.017 g, 0.28 mmol) in dry DMF (1.5 mL) gave **4d** (0.021 g, 30%) as a reddish oil. *Rf* 0.72 (hexane/EtOAc, 7:3). IR (film):  $\bar{\nu}$  2929, 1611, 1542, 1517, 1429, 1402, 1316, 1247, 1177, 1037, 828, 722 cm<sup>-1</sup>. <sup>1</sup>H NMR (750 MHz, CDCl<sub>3</sub>):  $\delta$  3.79 (s, 3H, OCH<sub>3</sub>), 4.23 (s, 2H, CH<sub>2</sub>), 6.83-6.88 (m, 3H, H-1, H-3'), 6.92 (br s, 1H, H-2), 7.12 (d, *J* = 7.5 Hz, 2H, H-2'), 7.41 (br s, 1H, H-3), 7.54 (s, 1H, H-5), 8.38 (s, 1H, H-8). <sup>13</sup>C NMR (187.5 MHz, CDCl<sub>3</sub>):  $\delta$  35.9 (CH<sub>2</sub>), 55.2 (CH<sub>3</sub>O), 107.7 (C-1), 114.1 (C-3'), 116.5 (C-3), 117.1 (C-2), 118.2 (C-6), 119.3 (C-8), 125.0 (C-5), 129.2 (C-8a), 130.0 (C-2'), 130.4 (C-1'), 139.4 (C-7), 158.3 (C-4'). HRMS (ED): *m/z* [M<sup>+</sup>] calcd for C<sub>16</sub>H<sub>14</sub>N<sub>2</sub>O<sub>3</sub>: 282.1005; found: 282.0998.

**1-(4-((7-Nitroindolizin-6-yl)methyl)phenyl)ethanone (4f).** Following the method of preparation for **4b**, a mixture of **2f** (0.050 g, 0.20 mmol), DBU (0.046 g, 0.30 mmol), and **3a** (0.018 g, 0.30 mmol) in dry DMF (1.0 mL) was stirred at rt for 1 h to produce **4f** (0.019 g, 33%) as a reddish solid. *Rf* 0.21 (hexane/EtOAc, 7:3); mp 134–136 °C. IR (film):  $\bar{\nu}$  2926, 1678, 1606, 1544, 1495, 1438, 1355, 1313, 1268, 1038, 723 cm<sup>-1</sup>. <sup>1</sup>H NMR (600 MHz, CDCl<sub>3</sub>):  $\delta$  2.58 (s, 3H, COCH<sub>3</sub>), 4.35 (s, 2H, CH<sub>2</sub>), 6.91 (d, *J* = 4.0 Hz, 1H, H-1), 6.97 (dd, *J* = 4.0, 2.4 Hz, 1H, H-2), 7.29 (d, *J* = 8.1 Hz, 2H, H-2'), 7.47 (br s, 1H, H-3), 7.66 (s, 1H, H-5), 7.89 (d, *J* = 8.1 Hz, 2H, H-3'), 8.44 (s, 1H, H-8). <sup>13</sup>C NMR (150 MHz, CDCl<sub>3</sub>):  $\delta$  26.6 (COCH<sub>3</sub>), 37.1 (CH<sub>2</sub>Ar), 108.3 (C-1), 116.4 (C-6), 116.8 (C-3), 117.5 (C-2), 119.7 (C-8), 125.3

(C-5), 128.7 (C-3'), 128.9 (C-2'), 129.3 (C-8a), 135.6 (C-4'), 138.8 (C-7), 144.4 (C-1'), 197.7 (COCH<sub>3</sub>). HRMS (EI): *m/z* [M<sup>+</sup>] calcd for C<sub>17</sub>H<sub>14</sub>N<sub>2</sub>O<sub>3</sub>: 294.1005; found: 294.1002.

**6-(3-Methoxybenzyl)-7-nitroindolizine (4g).** Following the method of preparation for **4b**, a mixture of **2g** (0.050 g, 0.21 mmol), DBU (0.073 g, 0.48 mmol), and **3a** (0.014 g, 0.23 mmol) in dry DMF (1.0 mL) furnished **4g** (0.028 g, 41%) as a reddish oil. *R<sub>f</sub>* 0.62 (hexane/EtOAc, 7:3). IR (film):  $\bar{\nu}$  2919, 1719, 1600, 1548, 1543, 1490, 1437, 1313, 1267, 1039, 846, 782, 736 cm<sup>-1</sup>. <sup>1</sup>H NMR (600 MHz, CDCl<sub>3</sub>):  $\delta$  3.78 (s, 3H, CH<sub>3</sub>O), 4.27 (s, 2H, CH<sub>2</sub>), 6.74 (br s, 1H, H-2'), 6.77-6.83 (m, 2H, H-4', H-6'), 6.87 (d, *J* = 3.5 Hz, 1H, H-1), 6.93 (dd, *J* = 3.5, 2.0 Hz, 1H, H-2), 7.32 (t, *J* = 6.5 Hz, 1H, H-5'), 7.42 (br s, 1H, H-3), 7.57 (s, 1H, H-5), 8.41 (s, 1H, H-8). <sup>13</sup>C NMR (150 MHz, CDCl<sub>3</sub>):  $\delta$  36.8 (CH<sub>2</sub>), 55.2 (CH<sub>3</sub>O), 107.8 (C-1), 111.7 (C-4'), 114.9 (C-2'), 116.6 (C-3), 117.2 (C-2), 117.4 (C-6), 119.4 (C-8), 121.3 (C-6'), 125.2 (C-5), 129.2 (C-8a), 129.6 (C-5'), 139.2 (C-7), 140.2 (C-1'), 159.8 (C-3'). HRMS (EI): *m/z* [M<sup>+</sup>] calcd for C<sub>16</sub>H<sub>14</sub>N<sub>2</sub>O<sub>3</sub>: 282.1005; found: 282.1006.

**6-(3-Fluorobenzyl)-7-nitroindolizine (4j).** Following the method of preparation for **4b**, a mixture of **2j** (0.050 g, 0.22 mmol), DBU (0.050 g, 0.33 mmol), and **3a** (0.017 g, 0.29 mmol) in dry DMF (1.0 mL) was heated at 80 °C for 2 h to obtain **4j** (0.032 g, 54%) as a reddish solid. *R<sub>f</sub>* 0.50 (hexane/EtOAc, 8:2); mp 103–105 °C. IR (film):  $\bar{\nu}$  1612, 1588, 1544, 1483, 1448, 1438, 1311, 1269, 1219, 1130, 1039, 790, 736, 725 cm<sup>-1</sup>. <sup>1</sup>H NMR (500 MHz, CDCl<sub>3</sub>):  $\delta$  4.28 (s, 2H, CH<sub>2</sub>), 6.85-6.93 (m, 3H, H-1, H-2', H-4'), 6.95 (dd, *J* = 4.0, 2.5 Hz, 1H, H-2), 6.98 (dm, *J* = 8.0 Hz, 1H, H-6'), 7.22-7.27 (m, 1H, H-5'), 7.45 (ddd, *J* = 2.5, 1.2, 0.7 Hz, 1H, H-3), 7.63-7.62 (m, 1H, H-5), 8.42 (s, 1H, H-8). <sup>13</sup>C NMR (125 MHz, CDCl<sub>3</sub>):  $\delta$  36.7 (d, *J*<sub>C,F</sub> = 1.7 Hz, CH<sub>2</sub>), 108.1 (C-1), 113.5 (d, *J*<sub>C,F</sub> = 21.0 Hz, C-2'), 115.6 (d, *J*<sub>C,F</sub> = 21.5 Hz, C-4'), 116.6 (C-6), 116.7 (C-3), 117.4 (C-2), 119.6 (C-8), 124.4 (d, *J*<sub>C,F</sub> = 2.9 Hz, C-6'), 125.2 (C-5), 129.2 (C-8a), 130.0 (d, *J*<sub>C,F</sub> = 8.3 Hz, C-5'), 138.9 (C-7), 141.3 (d, *J*<sub>C,F</sub> = 7.1 Hz, C-1'), 162.9 (d, *J*<sub>C,F</sub> = 245.0 Hz, C-3'). HRMS (EI): *m/z* [M<sup>+</sup>] calcd for C<sub>15</sub>H<sub>11</sub>FN<sub>2</sub>O<sub>2</sub>: 270.0805; found: 270.0805.

**Methyl 6-benzylindolizine-7-carboxylate (8b).** Following the method of preparation for **8a**, a mixture of **2b** (0.050 g, 0.24 mmol), DBU (0.055 g, 0.36 mmol), and **3b** (0.038 g, 0.29 mmol) in dry DMF (1.5 mL) was heated at 80 °C for 2 h to provide **8b** (0.011 g, 17%) as a brown solid. *R<sub>f</sub>* 0.48 (hexane/EtOAc, 9:1); mp 63–65 °C. IR (film):  $\bar{\nu}$  1712, 1453, 1352, 1263, 1252, 1191, 1184, 1153, 1078, 780, 716, 697 cm<sup>-1</sup>. <sup>1</sup>H NMR (600 MHz, CDCl<sub>3</sub>):  $\delta$  3.77 (s, 3H, CO<sub>2</sub>CH<sub>3</sub>), 4.28 (s, 2H, CH<sub>2</sub>Ar), 6.66 (d, *J* = 4.0 Hz, 1H, H-1), 6.82 (dd, *J* = 4.0, 2.4 Hz, 1H, H-2), 7.17–7.22 (m, 3H, H-2', H-4'), 7.27–7.31 (m, 3H, H-3, H-3'), 7.56 (s, 1H, H-5), 8.18 (s, 1H, H-8). <sup>13</sup>C NMR (150 MHz, CDCl<sub>3</sub>):  $\delta$  37.3 (CH<sub>2</sub>Ar), 51.7 (CO<sub>2</sub>CH<sub>3</sub>), 103.9 (C-1), 114.7 (C-3), 115.2 (C-2), 118.9 (C-7), 122.2 (C-6), 124.5 (C-8),



124.8 (C-5), 126.1 (C-4'), 128.4 (C-3'), 128.9 (C-2'), 130.5 (C-8a), 140.4 (C-1'), 166.9 (CO<sub>2</sub>CH<sub>3</sub>). HRMS (EI): m/z [M<sup>+</sup>] calcd for C<sub>17</sub>H<sub>15</sub>NO<sub>2</sub>: 265.1103; found: 265.1107.

**Methyl 6-(4-methylbenzyl)indolizine-7-carboxylate (8c).** Following the method of preparation for **8a**, a mixture of **2c** (0.050 g, 0.22 mmol), DBU (0.052 g, 0.34 mmol), and **3b** (0.034 g, 0.26 mmol) in dry DMF (1.5 mL) was heated at 140 °C for 12 h to give **8c** (0.005 g, 15%) as a brown oil. *R<sub>f</sub>* 0.48 (hexane/EtOAc, 9:1). IR (film):  $\bar{\nu}$  2925, 1713, 1460, 1441, 1350, 1251, 1262, 1189, 1080, 781, 714 cm<sup>-1</sup>. <sup>1</sup>H NMR (600 MHz, CDCl<sub>3</sub>):  $\delta$  2.32 (s, 3H, CH<sub>3</sub>), 3.78 (s, 3H, CO<sub>2</sub>CH<sub>3</sub>), 4.23 (s, 2H, CH<sub>2</sub>Ar), 6.65 (d, *J* = 3.6 Hz, 1H, H-1), 6.81 (dd, *J* = 3.6, 2.7 Hz, 1H, H-2), 7.06–7.11 (m, 4H, H-2', H-3'), 7.30 (br s, 1H, H-3), 7.54 (s, 1H, H-5), 8.17 (s, 1H, H-8). <sup>13</sup>C NMR (150 MHz, CDCl<sub>3</sub>):  $\delta$  21.0 (CH<sub>3</sub>), 36.8 (CH<sub>2</sub>Ar), 51.7 (CO<sub>2</sub>CH<sub>3</sub>), 103.8 (C-1), 114.6 (C-3), 115.1 (C-2), 119.0 (C-7), 122.5 (C-6), 124.5 (C-8), 124.7 (C-5), 128.8 (C-2'), 129.1 (C-3'), 130.5 (C-8a), 135.5 (C-4'), 137.2 (C-1'), 166.9 (CO<sub>2</sub>CH<sub>3</sub>). HRMS (EI): m/z [M<sup>+</sup>] calcd for C<sub>18</sub>H<sub>17</sub>NO<sub>2</sub>: 279.1259; found: 279.1260.

**Methyl 6-(4-methoxybenzyl)indolizine-7-carboxylate (8d).** Following the method of preparation for **8a**, a mixture of **2d** (0.060 g, 0.25 mmol), DBU (0.057 g, 0.38 mmol), and **3b** (0.043 g, 0.33 mmol) in dry DMF (1.5 mL) was heated at 140 °C for 12 h to produce **8d** (0.009 g, 12%) as a brown oil. *R<sub>f</sub>* 0.33 (hexane/EtOAc, 7:3). IR (film):  $\bar{\nu}$  1713, 1511, 1461, 1441, 1262, 1249, 1178, 1080, 1035 cm<sup>-1</sup>. <sup>1</sup>H NMR (750 MHz, CDCl<sub>3</sub>):  $\delta$  3.79 (s, 6H, OCH<sub>3</sub>, CO<sub>2</sub>CH<sub>3</sub>), 4.21 (s, 2H, CH<sub>2</sub>Ar), 6.65 (d, *J* = 3.8 Hz, 1H, H-1), 6.81 (dd, *J* = 3.8, 2.4 Hz, 1H, H-2), 6.82–6.86 (m, 2H, H-3'), 7.11 (d, *J* = 8.4 Hz, 2H, H-2'), 7.30 (br s, 1H, H-3), 7.53 (s, 1H, H-5), 8.17 (s, 1H, H-8). <sup>13</sup>C NMR (187.5 MHz, CDCl<sub>3</sub>):  $\delta$  36.4 (CH<sub>2</sub>Ar), 51.7 (CO<sub>2</sub>CH<sub>3</sub>), 55.2 (CH<sub>3</sub>O), 103.8 (C-1), 113.8 (C-3'), 114.7 (C-3), 115.1 (C-2), 119.0 (C-7), 122.8 (C-6), 124.5 (C-8), 124.6 (C-5), 130.0 (C-2'), 130.5 (C-8a), 132.3 (C-1'), 157.9 (C-4'), 166.9 (CO<sub>2</sub>CH<sub>3</sub>). HRMS (EI): m/z [M<sup>+</sup>] calcd for C<sub>18</sub>H<sub>17</sub>NO<sub>3</sub>: 295.1208; found: 295.1208.

**Methyl 6-(3-fluorobenzyl)indolizine-7-carboxylate (8g).** Following the method of preparation for **8a**, a mixture of **2f** (0.050 g, 0.22 mmol), DBU (0.034 g, 0.22 mmol), and **3b** (0.036 g, 0.27 mmol) in dry DMF (1.0 mL) was stirred at rt for 7 h to obtain **8g** (0.028 g, 45%) as a yellow solid. *R<sub>f</sub>* 0.60 (hexane/EtOAc, 8:2); mp 75–77 °C. IR (film):  $\bar{\nu}$  1714, 1614, 1584, 1485, 1446, 1352, 1258, 1244, 1188, 1158, 1062, 776, 714, 685 cm<sup>-1</sup>. <sup>1</sup>H NMR (500 MHz, CDCl<sub>3</sub>):  $\delta$  3.77 (s, 3H, CO<sub>2</sub>CH<sub>3</sub>), 4.27 (s, 2H, CH<sub>2</sub>Ar), 6.68 (d, *J* = 4.0 Hz, 1H, H-1), 6.83–6.86 (m, 1H, H-2), 6.86–6.91 (m, 2H, H-2', H-4'), 6.97 (d, *J* = 8.0 Hz, 1H, H-6'), 7.21–7.26 (m, 1H, H-5'), 7.32–7.35 (m, 1H, H-3), 7.61 (s, 1H, H-5), 8.21 (s, 1H, H-8). <sup>13</sup>C NMR (125 MHz, CDCl<sub>3</sub>):  $\delta$  37.1 (d, *J* = 1.8 Hz, CH<sub>2</sub>Ar), 51.7 (CO<sub>2</sub>CH<sub>3</sub>), 104.2 (C-1), 112.9 (d, *J*<sub>C,F</sub> = 21.1 Hz, C-4'), 114.8 (C-3), 115.3 (C-2), 115.6 (d, *J*<sub>C,F</sub> = 21.3 Hz, C-2'), 118.5 (C-7),

121.4 (C-6), 124.4 (d,  $J_{C,F} = 2.8$  Hz, C-6'), 124.7 (C-8), 124.8 (C-5), 129.7 (d,  $J_{C,F} = 8.3$  Hz, C-5'), 130.6 (C-8a), 143.3 (d,  $J_{C,F} = 7.1$  Hz, C-1'), 162.9 (d,  $J_{C,F} = 243.9$  Hz, C-3'), 166.6 (CO<sub>2</sub>CH<sub>3</sub>). HRMS (EI):  $m/z$  [ $M^+$ ] calcd for C<sub>17</sub>H<sub>14</sub>FNO<sub>4</sub>: 283.1009; found: 283.1007.

**6-Benzylindolizine-7-carbonitrile (8i).** Following the method of preparation for **8a**, a mixture of **2b** (0.050 g, 0.24 mmol), **3d** (0.029 g, 0.29 mmol), and DBU (0.055 g, 0.36 mmol) in dry DMF (1.5 mL) was heated at 80 °C for 12 h to provide **8i** (0.022 g, 40%) as a yellow solid. *R<sub>f</sub>* 0.64 (hexane/EtOAc, 8:2); mp 123–125 °C. IR (film):  $\bar{\nu}$  2217, 1493, 1454, 1350, 1275, 1267, 1255, 1069, 916, 772, 741, 721, 698 cm<sup>-1</sup>. <sup>1</sup>H NMR (500 MHz, CDCl<sub>3</sub>):  $\delta$  4.03 (s, 2H, CH<sub>2</sub>Ph), 6.67 (d,  $J = 3.5$  Hz, 1H, H-1), 6.86 (dd,  $J = 3.5, 2.5$  Hz, 1H, H-2), 7.24–7.31 (m, 3H, H-2', H-4'), 7.32–7.37 (m, 3H, H-3, H-3'), 7.58 (s, 1H, H-5), 7.80 (s, 1H, H-8). <sup>13</sup>C NMR (125 MHz, CDCl<sub>3</sub>):  $\delta$  37.1 (CH<sub>2</sub>Ph), 101.5 (C-7), 104.4 (C-1), 115.8 (C-2), 116.1 (C-3), 118.3 (CN), 122.0 (C-6), 124.0 (C-5), 126.9 (C-4'), 127.0 (C-8), 128.7 (C-3'), 129.1 (C-2'), 129.9 (C-8a), 138.0 (C-1'). HRMS (EI):  $m/z$  [ $M^+$ ] calcd for C<sub>16</sub>H<sub>12</sub>N<sub>2</sub>: 232.1000; found: 232.1001.

**6-(4-Methoxybenzyl)indolizine-7-carbonitrile (8j).** Following the method of preparation for **8a**, a mixture of **2d** (0.050 g, 0.21 mmol), **3d** (0.025 g, 0.25 mmol), and DBU (0.047 g, 0.31 mmol) in dry DMF (1.5 mL) was heated at 140 °C for 24 h to give **8j** (0.013 g, 24%) as a brown solid. *R<sub>f</sub>* 0.35 (hexane/EtOAc, 9:1); mp 72–74 °C. IR (film):  $\bar{\nu}$  2218, 1717, 1609, 1509, 1346, 1243, 1178, 1028, 835, 724, 718 cm<sup>-1</sup>. <sup>1</sup>H NMR (500 MHz, CDCl<sub>3</sub>):  $\delta$  3.81 (s, 3H, CH<sub>3</sub>O), 3.97 (s, 2H, CH<sub>2</sub>Ar), 6.67 (br d,  $J = 4.5$  Hz, 1H, H-1), 6.86 (dd,  $J = 4.5, 3.0$  Hz, 1H, H-2), 6.87–6.91 (m, 2H, H-3'), 7.18–7.22 (m, 2H, H-2'), 7.33–7.35 (m, 1H, H-3), 7.56 (br s, 1H, H-5), 7.80 (s, 1H, H-8). <sup>13</sup>C NMR (125 MHz, CDCl<sub>3</sub>):  $\delta$  36.3 (CH<sub>2</sub>Ar), 55.3 (CH<sub>3</sub>O), 101.4 (C-7), 104.4 (C-1), 114.1 (C-3'), 115.8 (C-2), 116.1 (C-3), 118.3 (CN), 122.5 (C-6), 123.8 (C-5), 127.0 (C-8), 129.9 (C-8a, C-1'), 130.2 (C-2'), 158.5 (C-4'). HRMS (EI):  $m/z$  [ $M^+$ ] calcd for C<sub>17</sub>H<sub>14</sub>N<sub>2</sub>O: 262.1106; found: 262.1108.

**6-(4-Acetylbenzyl)indolizine-7-carbonitrile (8k).** Following the method of preparation for **8a**, a mixture of **2f** (0.050 g, 0.20 mmol), **3d** (0.024 g, 0.24 mmol), and DBU (0.046 g, 0.30 mmol) in dry DMF (1.5 mL) was heated at 80 °C for 2 h to produce **8k** (0.025 g, 46%) as a brown solid. *R<sub>f</sub>* 0.43 (hexane/EtOAc, 8:2); mp 142–144 °C. IR (film):  $\bar{\nu}$  2218, 1675, 1605, 1346, 1266, 1184, 885, 728 cm<sup>-1</sup>. <sup>1</sup>H NMR (500 MHz, CDCl<sub>3</sub>):  $\delta$  2.59 (s, 3H, COCH<sub>3</sub>), 4.08 (s, 2H, CH<sub>2</sub>), 6.70 (d,  $J = 4.0$  Hz, 1H, H-1), 6.89 (dd,  $J = 4.0, 2.7$  Hz, 1H, H-2), 7.36–7.39 (m, 3H, H-2', H-3), 7.66–7.67 (m, 1H, H-5), 7.81 (s, 1H, H-8), 7.92–7.95 (m, 2H, H-3'). <sup>13</sup>C NMR (125 MHz, CDCl<sub>3</sub>):  $\delta$  26.6 (COCH<sub>3</sub>), 37.0 (CH<sub>2</sub>Ar), 101.0 (C-7), 104.7 (C-1), 116.0 (C-2), 116.3 (C-3), 118.1 (CN), 120.8 (C-6), 124.1 (C-5), 127.2 (C-8), 128.8

(C-3'), 129.2 (C-2'), 129.8 (C-8a), 135.8 (C-4'), 143.6 (C-1'), 197.7 (COCH<sub>3</sub>). HRMS (EI): *m/z* [M<sup>+</sup>] calcd for C<sub>18</sub>H<sub>14</sub>N<sub>2</sub>O: 274.1106; found: 274.1103.

**6-(3-Nitrobenzyl)indolizine-7-carbonitrile (8l)**. Method A: Following the method of preparation for **8a**, a mixture of **2h** (0.050 g, 0.20 mmol), **3d** (0.024 g, 0.24 mmol), and DBU (0.046 g, 0.30 mmol) in dry DMF (1.5 mL) was heated at 80 °C for 2 h to furnish **8l** (0.031 g, 57%) as a yellow solid.

Method B: Following the method of preparation for **8a**, a mixture of **2h** (0.100 g, 0.394 mmol), **3e** (0.037 g, 0.56 mmol), and DBU (0.137 g, 0.90 mmol) in dry DMF (1.5 mL) was stirred at rt for 8 h to afford **8l** (0.055 g, 50%) as a yellow solid. *R<sub>f</sub>* 0.45 (hexane/EtOAc, 7:3); mp 172–174 °C. IR (film):  $\bar{\nu}$  2212, 1633, 1525, 1456, 1349, 1270, 1097, 1068, 1034, 800, 723 cm<sup>-1</sup>. <sup>1</sup>H NMR (500 MHz, CDCl<sub>3</sub>):  $\delta$  4.13 (s, 2H, CH<sub>2</sub>), 6.73 (br d, *J* = 4.0 Hz, 1H, H-1), 6.92 (dd, *J* = 4.0, 2.5 Hz, 1H, H-2), 7.43 (br s, 1H, H-3), 7.52 (t, *J* = 7.5 Hz, 1H, H-5'), 7.66 (br d, *J* = 7.5 Hz, 1H, H-6'), 7.75 (s, 1H, H-5), 7.83 (s, 1H, H-8), 8.10 (br s, 1H, H-2'), 8.12 (d, *J* = 7.5 Hz, 1H, H-4'). <sup>13</sup>C NMR (125 MHz, CDCl<sub>3</sub>):  $\delta$  36.8 (CH<sub>2</sub>), 100.8 (C-7), 105.1 (C-1), 116.3 (C-2), 116.5 (C-3), 118.0 (CN), 120.2 (C-6), 122.1 (C-4'), 123.6 (C-2'), 124.2 (C-5), 127.5 (C-8), 129.7 (C-5'), 129.9 (C-8a), 135.3 (C-6'), 140.3 (C-1'), 148.5 (C-3'). HRMS (EI): *m/z* [M<sup>+</sup>] calcd for C<sub>16</sub>H<sub>11</sub>N<sub>3</sub>O<sub>2</sub>: 277.0851; found: 277.0850.

**(E)-Methyl 3-(1-(3-(3-nitrophenyl)prop-2-yn-1-yl)-1H-pyrrol-2-yl)acrylate (10)**. In a round-bottomed flask (100 mL) equipped with a magnetic stirring bar, trimethyl phosphonoacetate (0.086 g, 0.471 mmol) in anhydrous THF (10 mL) was added to a suspension of NaH (60%, 0.024 g, 0.600 mmol) in anhydrous THF (20 mL) under N<sub>2</sub> atmosphere at 0 °C. After stirring at 0 °C for 30 min, **2h** (0.100 g, 0.39 mmol) was added and stirring continued at rt for 4 h. The solvent was removed under vacuum, and the residue purified by column chromatography over silica gel (30 g/g crude, hexane/EtOAc, 9:1) led to **10** (0.12 g, 98%) as a yellow solid. *R<sub>f</sub>* 0.50 (hexane/EtOAc, 7:3); mp 74–75 °C. IR (film):  $\bar{\nu}$  3085, 2950, 1699, 1622, 1531, 1468, 1435, 1350, 1327, 1279, 1170, 1131, 1080, 1030, 968, 874, 852, 807, 735, 674 cm<sup>-1</sup>. <sup>1</sup>H NMR (500 MHz, CDCl<sub>3</sub>):  $\delta$  3.79 (s, 3H, CO<sub>2</sub>CH<sub>3</sub>), 5.01 (s, 2H, H-1"), 6.22 (d, *J* = 15.5 Hz, 1H, H-2), 6.24-6.26 (m, 1H, H-4'), 6.72 (dd, *J* = 4.0, 1.5 Hz, 1H, H-3'), 6.97 (dd, *J* = 2.5, 1.5 Hz, 1H, H-5'), 7.50 (dd, *J* = 8.5, 7.5 Hz, 1H, H-5'''), 7.70-7.73 (m, 1H, H-6'''), 7.73 (d, *J* = 15.5 Hz, 1H, H-3), 8.17 (ddd, *J* = 8.5, 2.5, 1.0 Hz, 1H, H-4'''), 8.26 (dd, *J* = 2.0, 1.5 Hz, 1H, H-2'''). <sup>13</sup>C NMR (125 MHz, CDCl<sub>3</sub>):  $\delta$  37.4 (C-1"), 51.6 (CO<sub>2</sub>CH<sub>3</sub>), 83.5 (C-3"), 85.4 (C-2"), 110.1 (C-4'), 112.7 (C-3'), 113.3 (C-2), 123.5 (C-4'''), 123.7 (C-1'''), 125.7 (C-5'), 126.6 (C-2'''), 128.8 (C-2'), 129.4 (C-5'''), 131.9 (C-3), 137.5 (C-6'''), 148.0 (C-3'''), 168.0 (CO<sub>2</sub>Me). HRMS (EI): *m/z* [M<sup>+</sup>] calcd for C<sub>17</sub>H<sub>14</sub>N<sub>2</sub>O<sub>4</sub>: 310.0954; found: 310.0955.

**(E)-Methyl 3-(5-formyl-1-(3-(3-nitrophenyl)prop-2-yn-1-yl)-1H-pyrrol-2-yl)acrylate (11).** In a round-bottomed flask (100 mL) equipped with a magnetic stirring bar, a mixture of **10** (0.363 g, 1.17 mmol) and anhydrous DMF (0.128 g, 1.75 mmol) was stirred at rt for 15 min under N<sub>2</sub> atmosphere. Subsequently, POCl<sub>3</sub> (0.268 g, 1.75 mmol) was added followed by stirring for 24 h, and then a cold 10% aqueous solution of KOH (10 mL) was added followed by stirring for 20 min. The mixture was extracted with CH<sub>2</sub>Cl<sub>2</sub> (2 x 10 mL), and the organic layer was dried (Na<sub>2</sub>SO<sub>4</sub>) and removed under vacuum. The residue was purified by column chromatography over silica gel (30 g/g crude, hexane/EtOAc, 96:4) to deliver **11** (0.303 g, 76%) as a white solid. *R<sub>f</sub>* 0.42 (hexane/EtOAc, 7:3); mp 136 °C-decomp. IR (film):  $\bar{\nu}$  3083, 2951, 2850, 1710, 1659, 1631, 1529, 1474, 1448, 1409, 1351, 1313, 1279, 1233, 1196, 1167, 1049, 968, 782, 736, 674 cm<sup>-1</sup>. <sup>1</sup>H NMR (500 MHz, CDCl<sub>3</sub>):  $\delta$  3.83 (s, 3H, CO<sub>2</sub>CH<sub>3</sub>), 5.64 (s, 2H, H-1''), 6.49 (d, *J* = 15.7 Hz, 1H, H-2), 6.73 (d, *J* = 4.5 Hz, 1H, H-3'), 6.98 (d, *J* = 4.5 Hz, 1H, H-4'), 7.47 (t, *J* = 8.0 Hz, 1H, H-5'''), 7.69 (dt, *J* = 8.0, 1.5 Hz, 1H, H-6'''), 7.82 (d, *J* = 15.7 Hz, 1H, H-3), 8.14 (ddd, *J* = 8.0, 2.3, 1.0 Hz, 1H, H-4'''), 8.22 (t, *J* = 2.0 Hz, 1H, H-2'''), 9.63 (s, 1H, CHO). <sup>13</sup>C NMR (125 MHz, CDCl<sub>3</sub>):  $\delta$  35.1 (C-1''), 52.0 (CO<sub>2</sub>CH<sub>3</sub>), 82.8 (C-3''), 85.9 (C-2''), 111.8 (C-3'), 121.0 (C-2), 123.4 (C-4'''), 123.8 (C-1'''), 124.8 (C-4'), 126.7 (C-2'''), 129.3 (C-5'''), 130.3 (C-3), 132.9 (C-5'), 137.4 (C-2'), 137.5 (C-6'''), 148.0 (C-3'''), 166.7 (CO<sub>2</sub>Me), 180.0 (CHO). HRMS (EI): *m/z* [M<sup>+</sup>] calcd for C<sub>18</sub>H<sub>14</sub>N<sub>2</sub>O<sub>5</sub>: 338.0903; found: 338.0896.

**(E)-Dimethyl 2-((5-(3-methoxy-3-oxoprop-1-en-1-yl)-1-(propa-1,2-dien-1-yl)-1H-pyrrol-2-yl)methylene)malonate (6b).** In a round-bottomed flask (50 mL) equipped with a magnetic stirring bar, a mixture of **6a** (0.300 g, 1.38 mmol), **3b** (0.219 g, 1.66 mmol), piperidine (0.047 g, 0.55 mmol), and glacial acetic acid (0.050 g, 0.83 mmol) in CH<sub>2</sub>Cl<sub>2</sub> (20 mL) was heated at 150 °C for 8 h under N<sub>2</sub> atmosphere. The mixture was diluted with CH<sub>2</sub>Cl<sub>2</sub> (50 mL) and washed with an aqueous saturated solution of NaHCO<sub>3</sub> (100 mL). The aqueous layer was washed with CH<sub>2</sub>Cl<sub>2</sub> (3 x 50 mL), the organic extracts were dried (Na<sub>2</sub>SO<sub>4</sub>), and the solvent was removed under vacuum. The residue was purified by column chromatography over silica gel (30 g/g crude, hexane/EtOAc, 9:1) to provide **6b** (0.389 g, 85%) as a yellow oily solid. *R<sub>f</sub>* 0.40 (hexano/AcOEt, 7:3). IR (film):  $\bar{\nu}$  2953, 1716, 1606, 1527, 1435, 1388, 1364, 1309, 1228, 1071, 971, 924, 896, 851, 770, 743 cm<sup>-1</sup>. <sup>1</sup>H NMR (500 MHz, CDCl<sub>3</sub>):  $\delta$  3.78 (s, 3H, CHCO<sub>2</sub>CH<sub>3</sub>), 3.82 (s, 3H, CO<sub>2</sub>CH<sub>3</sub>), 3.88 (s, 3H, CO<sub>2</sub>CH<sub>3</sub>), 5.49 (d, *J* = 6.5 Hz, 2H, H-3'''), 6.30 (d, *J* = 15.5 Hz, 1H, H-2<sup>IV</sup>), 6.66 (br d, *J* = 4.3 Hz, 1H, H-3''), 6.73 (br d, *J* = 4.3 Hz, 1H, H-4''), 6.79 (t, *J* = 6.5 Hz, 1H, H-1'''), 7.65 (d, *J* = 15.5 Hz, 1H, H-1<sup>IV</sup>), 7.76 (s, 1H, H-1'). <sup>13</sup>C NMR (125 MHz, CDCl<sub>3</sub>):  $\delta$  51.5 (CHCO<sub>2</sub>CH<sub>3</sub>), 52.3 (CO<sub>2</sub>CH<sub>3</sub>), 52.5 (CO<sub>2</sub>CH<sub>3</sub>), 84.6 (C-3'''), 93.1 (C-1'''), 113.1 (C-4''), 115.5 (C-3''), 116.7 (C-2<sup>IV</sup>), 120.6 (C-2), 129.3 (C-1'), 129.9 (C-2''), 131.4 (C-1<sup>IV</sup>), 133.6 (C-5''), 164.5

(CO<sub>2</sub>CH<sub>3</sub>), 166.9 (CO<sub>2</sub>CH<sub>3</sub>), 167.1 (CHCO<sub>2</sub>CH<sub>3</sub>), 208.0 (C-2''). HRMS (EI): *m/z* [M<sup>+</sup>] calcd for C<sub>17</sub>H<sub>17</sub>NO<sub>6</sub>: 331.1056; found: 331.1040.

**Methyl 6-(4-acetylbenzyl)-3-formylindolizine-7-carboxylate (12a).** POCl<sub>3</sub> (0.017 g, 1.10 mmol) was added to anhydrous DMF (0.008 g, 1.10 mmol) at 0 °C, and the mixture was stirred for 10 min. Subsequently, a solution of **8e** (0.030 g, 0.10 mmol) in anhydrous CH<sub>2</sub>Cl<sub>2</sub> (3.0 mL) was added dropwise and stirred at 0 °C for 2 h. The reaction mixture was quenched with a 1 M aqueous solution of KOH until neutral, CH<sub>2</sub>Cl<sub>2</sub> (30 mL) was added, the organic layer dried (Na<sub>2</sub>SO<sub>4</sub>) and the solvent removed under vacuum. The residue was purified by column chromatography over silica gel (20 g/g crude, hexane/EtOAc, 98:2) to furnish **12a** (0.021 g, 64%) as a pale yellow solid. *R<sub>f</sub>* 0.29 (hexane/EtOAc, 8:2); mp 187–189 °C. IR (film):  $\bar{\nu}$  1717, 1678, 1639, 1604, 1454, 1392, 1373, 1334, 1261, 1206, 1026, 783 cm<sup>-1</sup>. <sup>1</sup>H NMR (600 MHz, CDCl<sub>3</sub>):  $\delta$  2.56 (s, 3H, COCH<sub>3</sub>), 3.78 (s, 3H, CO<sub>2</sub>CH<sub>3</sub>), 4.43 (s, 2H, CH<sub>2</sub>Ar), 6.76 (d, *J* = 4.5 Hz, 1H, H-1), 7.25 (d, *J* = 8.0 Hz, 2H, H-2'), 7.48 (d, *J* = 4.5 Hz, 1H, H-2), 7.86 (d, *J* = 8.0 Hz, 2H, H-3'), 8.26 (s, 1H, H-8), 9.58 (s, 1H, H-5), 9.79 (s, 1H, CHO). <sup>13</sup>C NMR (150 MHz, CDCl<sub>3</sub>):  $\delta$  26.5 (COCH<sub>3</sub>), 37.4 (CH<sub>2</sub>Ar), 52.3 (CO<sub>2</sub>CH<sub>3</sub>), 106.3 (C-1), 122.9 (C-8), 124.9 (C-6), 125.0 (C-3), 126.2 (C-7), 126.8 (C-2), 128.4 (C-5), 128.5 (C-3'), 128.7 (C-2'), 135.3 (C-4'), 137.2 (C-8a), 145.8 (C-1'), 165.7 (CO<sub>2</sub>CH<sub>3</sub>), 178.4 (CHO), 197.7 (COCH<sub>3</sub>). HRMS (EI): *m/z* [M<sup>+</sup>] calcd for C<sub>20</sub>H<sub>17</sub>NO<sub>4</sub>: 335.1158; found: 335.1152.

**Methyl 3-(4-acetylphenyl)-2-bromo-6-(3-nitrobenzyl)indolizine-7-carboxylate (13b).** **Methyl 3-(4-acetylphenyl)-6-(3-nitrobenzyl)indolizine-7-carboxylate (13c).** In a threaded ACE glass pressure tube equipped with a sealed Teflon screw cap and a magnetic stirring bar, a mixture of **13a** (0.050 g, 0.11 mmol), (4-acetylphenyl)boronic acid (0.026 g, 0.16 mmol), Pd(PPh<sub>3</sub>)<sub>4</sub> (0.006 g, 0.005 mmol), and K<sub>2</sub>CO<sub>3</sub> (0.022 g, 0.16 mmol) in dry DMF/EtOH (1:1, 2 mL) was heated at 70 °C for 8 h. A solution of brine was added (20 mL), the mixture extracted with EtOAc (40 mL), the organic layer dried (Na<sub>2</sub>SO<sub>4</sub>), and the solvent removed under vacuum. The residue was purified by column chromatography over silica gel (20 g/g crude, hexane/EtOAc, 1:1) to generate a mixture of **13b/13c** (6:1, 0.022 g, 66%) as a yellow solid. *R<sub>f</sub>* 0.69 (hexane/EtOAc, 8:2); mp 140–143 °C. IR (film):  $\bar{\nu}$  1715, 1676, 1600, 1526, 1440, 1350, 1254, 1196, 1187, 958, 820, 736 cm<sup>-1</sup>. <sup>1</sup>H NMR (600 MHz, CDCl<sub>3</sub>):  $\delta$  2.64 (s, 3H, COCH<sub>3</sub>), 3.80 (s, 3H, CO<sub>2</sub>CH<sub>3</sub>), 4.38 (s, 2H, CH<sub>2</sub>Ar), 7.07 (s, 1H, H-1), 7.43 (t, *J* = 7.9 Hz, 1H, H-5''), 7.49–7.52 (m, 1H, H-6''), 7.62 (d, *J* = 8.4 Hz, 2H, H-2'), 7.99 (s, 1H, H-2''), 8.02–8.09 (m, 4H, H-4'', H-3', H-5), 8.26 (s, 1H, H-8). Signals attributed to minor isomer **13c**: 2.65 (s, COCH<sub>3</sub>), 3.77 (s, CO<sub>2</sub>CH<sub>3</sub>), 6.85 (d, *J* = 4.2 Hz, H-1), 7.05 (d, *J* = 4.2 Hz, H-2), 7.42 (t, *J* = 7.9 Hz, H-5''), 7.53 (m, H-6''), 7.67 (d, *J* = 8.4 Hz, H-2'), 7.72 (d, *J* = 8.3 Hz, H-3'), 8.12 (s, 1H, H-5), 8.30 (s, 1H, H-8). <sup>13</sup>C NMR (150 MHz, CDCl<sub>3</sub>):  $\delta$

26.6 (COCH<sub>3</sub>), 37.2 (ArCH<sub>2</sub>), 52.0 (CO<sub>2</sub>CH<sub>3</sub>), 93.3 (C-2), 118.4 (C-1), 119.7 (C-6), 121.4 (C-4'), 122.5 (C-5), 123.2 (C-2'), 123.9 (C-8), 126.8 (C-3), 127.4 (C-1''), 127.6 (C-2'), 129.2 (C-5'), 129.3 (C-3'), 130.1 (C-8a), 134.8 (C-6'), 142.4 (C-1'), 148.3 (C-3'), 165.7 (CO<sub>2</sub>CH<sub>3</sub>), 197.1 (COCH<sub>3</sub>). Signals attributed to minor isomer **13c**: 26.8 (COCH<sub>3</sub>), 37.4 (ArCH<sub>2</sub>), 51.9 (CO<sub>2</sub>CH<sub>3</sub>), 106.1 (C-1), 117.2 (C-2), 122.3 (C-5), 125.6 (C-8), 127.4 (C-3'), 127.5 (C-2'), 129.0 (C-5'), 166.1 (CO<sub>2</sub>CH<sub>3</sub>), 197.6 (COCH<sub>3</sub>). HRMS (EI): *m/z* [M<sup>+</sup>] calcd for C<sub>25</sub>H<sub>19</sub>N<sub>2</sub>O<sub>5</sub>Br: 506.0477; found: 506.0489.

**3-(4-Methylbenzyl)pyrrolo[1,2-*a*]pyrazine (14c)**. Following the method of preparation for **14a**, a mixture of **2c** (0.050 g, 0.22 mmol), DBU (0.038 g, 0.25 mmol), and NH<sub>4</sub>OAc (0.022 g, 0.29 mmol) in dry DMF (1.0 mL) was heated at 140 °C for 12 h to give **14c** (0.023 g, 46%) as a brown solid. *R<sub>f</sub>* 0.29 (hexane/EtOAc, 7:3); mp 42–44 °C. IR (film):  $\bar{\nu}$  1616, 1513, 1442, 1425, 1345, 1302, 1245, 1030, 937, 797, 760, 731, 721 cm<sup>-1</sup>. <sup>1</sup>H NMR (500 MHz, CDCl<sub>3</sub>):  $\delta$  2.33 (s, 3H, CH<sub>3</sub>Ar), 3.98 (s, 2H, CH<sub>2</sub>Ar), 6.72 (dm, *J* = 4.0 Hz, 1H, H-8), 6.80 (dd, *J* = 4.0, 2.5 Hz, 1H, H-7), 7.13 (d, *J* = 8.0 Hz, 2H, H-3'), 7.19 (d, *J* = 8.0 Hz, 2H, H-2'), 7.27–7.29 (m, 1H, H-6), 7.49 (br s, 1H, H-4), 8.75 (s, 1H, H-1). <sup>13</sup>C NMR (125 MHz, CDCl<sub>3</sub>):  $\delta$  21.0 (CH<sub>3</sub>Ar), 40.5 (CH<sub>2</sub>Ar), 103.2 (C-8), 114.6 (C-6), 114.7 (C-7), 115.6 (C-4), 127.3 (C-8a), 129.0 (C-2'), 129.3 (C-3'), 135.8 (C-1'), 136.0 (C-4'), 138.9 (C-3), 144.6 (C-1). HRMS (EI): *m/z* [M<sup>+</sup>] calcd for C<sub>15</sub>H<sub>14</sub>N<sub>2</sub>: 222.1157; found: 222.1158.

**3-(4-Methoxybenzyl)pyrrolo[1,2-*a*]pyrazine (14d)**. Following the method of preparation for **14a**, a mixture of **2d** (0.050 g, 0.21 mmol), DBU (0.038 g, 0.25 mmol), and NH<sub>4</sub>OAc (0.032 g, 0.42 mmol) in dry DMF (1.0 mL) was heated at 140 °C for 24 h to furnish **14d** (0.021 g, 43%) as a brown solid. *R<sub>f</sub>* 0.31 (hexane/EtOAc, 7:3); mp 127–129 °C. IR (film):  $\bar{\nu}$  2921, 1601, 1583, 1486, 1439, 1344, 1305, 1260, 1151, 1038, 942, 771, 721, 698 cm<sup>-1</sup>. <sup>1</sup>H NMR (500 MHz, CDCl<sub>3</sub>):  $\delta$  3.79 (s, 3H, OCH<sub>3</sub>), 3.97 (s, 2H, CH<sub>2</sub>Ar), 6.72 (d, *J* = 3.7 Hz, 1H, H-8), 6.78–6.81 (m, 1H, H-7), 6.87 (d, *J* = 8.5 Hz, 2H, H-3'), 7.22 (d, *J* = 8.5 Hz, 2H, H-2'), 7.29 (br s, 1H, H-6), 7.49 (s, 1H, H-4), 8.75 (s, 1H, H-1). <sup>13</sup>C NMR (125 MHz, CDCl<sub>3</sub>):  $\delta$  40.2 (CH<sub>2</sub>Ar), 55.2 (CH<sub>3</sub>O), 103.0 (C-8), 114.0 (C-3'), 114.6 (C-6), 114.7 (C-7), 115.6 (C-4), 127.4 (C-8a), 130.1 (C-2'), 131.1 (C-1'), 139.2 (C-3), 144.7 (C-1), 158.3 (C-4'). HRMS (EI): *m/z* [M<sup>+</sup>] calcd for C<sub>15</sub>H<sub>14</sub>N<sub>2</sub>O: 238.1106; found: 238.1105.

**4-(Pyrrolo[1,2-*a*]pyrazin-3-ylmethyl)benzaldehyde (14e)**. Following the method of preparation for **14a**, a mixture of **2e** (0.060 g, 0.25 mmol), DBU (0.046 g, 0.30 mmol), and NH<sub>4</sub>OAc (0.023 g, 0.30 mmol) in dry DMF (1.5 mL) was heated at 60 °C for 1 h to produce **14e** (0.010 g, 17%) as a brown oil. *R<sub>f</sub>* 0.21 (hexane/EtOAc, 7:3). IR (film):  $\bar{\nu}$  2922, 2835, 1599, 1584, 1489, 1445, 1303, 1258, 1153, 1073, 1048, 889, 770, 721, 696 cm<sup>-1</sup>. <sup>1</sup>H NMR (750 MHz, CDCl<sub>3</sub>):  $\delta$  4.09 (s, 2H, CH<sub>2</sub>Ar), 6.77 (br d, *J*

= 3.5 Hz, 1H, H-8), 6.83–6.86 (m, 1H, H-7), 7.36 (br s, 1H, H-6), 7.48 (d,  $J = 8.0$  Hz, 2H, H-2'), 7.63 (s, 1H, H-4), 7.84 (d,  $J = 8.0$  Hz, 2H, H-3'), 8.76 (s, 1H, H-1), 9.99 (s, 1H, CHO).  $^{13}\text{C}$  NMR (187.5 MHz,  $\text{CDCl}_3$ ):  $\delta$  41.1 ( $\text{CH}_2\text{Ar}$ ), 103.5 (C-8), 114.8 (C-6), 115.0 (C-7), 115.9 (C-4), 127.4 (C-8a), 129.7 (C-2'), 130.1 (C-3'), 134.9 (C-4'), 137.4 (C-3), 145.0 (C-1), 146.5 (C-1'), 192.0 (CHO). HRMS (EI):  $m/z$  [ $\text{M}^+$ ] calcd for  $\text{C}_{15}\text{H}_{12}\text{N}_2\text{O}$ : 236.0950; found: 236.0953.

**1-(4-(Pyrrolo[1,2-*a*]pyrazin-3-ylmethyl)phenyl)ethanone (14f).** Following the method of preparation for **14a**, a mixture of **2f** (0.050 g, 0.20 mmol), DBU (0.036 g, 0.24 mmol), and  $\text{NH}_4\text{OAc}$  (0.031 g, 0.40 mmol) in dry DMF (1.0 mL) was heated at 60 °C for 1 h to afford **14f** (0.035 g, 70%) as a brown solid.  $R_f$  0.19 (hexane/EtOAc, 7:3); mp 95–97 °C. IR (film):  $\bar{\nu}$  2920, 1681, 1606, 1427, 1356, 1303, 1270, 1073, 960, 797, 721  $\text{cm}^{-1}$ .  $^1\text{H}$  NMR (300 MHz,  $\text{CDCl}_3$ ):  $\delta$  2.59 (s, 3H,  $\text{COCH}_3$ ), 4.07 (s, 2H,  $\text{CH}_2\text{Ar}$ ), 6.75 (dm,  $J = 4.1$  Hz, 1H, H-8), 6.84 (dd,  $J = 4.1, 2.4$  Hz, 1H, H-7), 7.32–7.36 (m, 1H, H-6), 7.37–7.43 (m, 2H, H-2'), 7.60 (s, 1H, H-4), 7.88–7.95 (m, 2H, H-3'), 8.76 (s, 1H, H-1).  $^{13}\text{C}$  NMR (75.4 MHz,  $\text{CDCl}_3$ ):  $\delta$  26.6 ( $\text{COCH}_3$ ), 40.9 ( $\text{CH}_2\text{Ar}$ ), 103.4 (C-8), 114.8 (C-6), 114.9 (C-7), 115.9 (C-4), 127.3 (C-8a), 128.7 (C-3'), 129.3 (C-2'), 135.5 (C-4'), 137.6 (C-3), 144.8 (C-1'), 144.9 (C-1), 197.8 ( $\text{COCH}_3$ ). HRMS (EI):  $m/z$  [ $\text{M}^+$ ] calcd for  $\text{C}_{16}\text{H}_{14}\text{N}_2\text{O}$ : 250.1106; found: 250.1107.

**3-(3-Methoxybenzyl)pyrrolo[1,2-*a*]pyrazine (14g).** Following the method of preparation for **14a**, a mixture of **2g** (0.050 g, 0.21 mmol), DBU (0.038 g, 0.25 mmol), and  $\text{NH}_4\text{OAc}$  (0.032 g, 0.42 mmol) in dry DMF (1.0 mL) was heated at 120 °C for 12 h to yield **14g** (0.016 g, 33%) as a brown solid.  $R_f$  0.29 (hexane/EtOAc, 7:3); mp 43–45 °C. IR (film):  $\bar{\nu}$  2922, 1599, 1584, 1489, 1445, 1348, 1303, 1258, 1153, 1048, 770, 721, 696  $\text{cm}^{-1}$ .  $^1\text{H}$  NMR (500 MHz,  $\text{CDCl}_3$ ):  $\delta$  3.79 (s, 3H,  $\text{CH}_3\text{O}$ ), 4.00 (s, 2H,  $\text{CH}_2\text{Ar}$ ), 6.73 (dm,  $J = 4.0$  Hz, 1H, H-8), 6.79 (dd,  $J = 8.0, 2.5$  Hz, 1H, H-4'), 6.81 (dd,  $J = 4.0, 2.5$  Hz, 1H, H-7), 6.85 (br s, 1H, H-2'), 6.89 (d,  $J = 8.0$  Hz, 1H, H-6'), 7.24 (t,  $J = 8.0$  Hz, 1H, H-5'), 7.30 (br s, 1H, H-6), 7.53 (s, 1H, H-4), 8.76 (s, 1H, H-1).  $^{13}\text{C}$  NMR (125 MHz,  $\text{CDCl}_3$ ):  $\delta$  41.1 ( $\text{CH}_2\text{Ar}$ ), 55.2 ( $\text{CH}_3\text{O}$ ), 103.2 (C-8), 111.9 (C-4'), 114.6 (C-6), 114.7 (C-7), 114.9 (C-2'), 115.8 (C-4), 121.5 (C-6'), 127.4 (C-8a), 129.6 (C-5'), 138.6 (C-3), 140.6 (C-1'), 144.7 (C-1), 159.8 (C-3'). HRMS (EI):  $m/z$  [ $\text{M}^+$ ] calcd for  $\text{C}_{15}\text{H}_{14}\text{N}_2\text{O}$ : 238.1106; found: 238.1109.

**3-(3-Fluorobenzyl)pyrrolo[1,2-*a*]pyrazine (14i).** Following the method of preparation for **14a**, a mixture of **2j** (0.050 g, 0.22 mmol), DBU (0.040 g, 0.26 mmol), and  $\text{NH}_4\text{OAc}$  (0.034 g, 0.44 mmol) in dry DMF (1.0 mL) was heated at 80 °C for 2 h to provide **14i** (0.025 g, 51%) as a brown oil.  $R_f$  0.21 (hexane/EtOAc, 7:3). IR (film):  $\bar{\nu}$  3079, 2924, 1715, 1615, 1589, 1488, 1447, 1349, 1304, 1246, 1134, 1074, 963, 787, 754, 722, 693  $\text{cm}^{-1}$ .  $^1\text{H}$  NMR (500 MHz,  $\text{CDCl}_3$ ):  $\delta$  4.01 (s, 2H,  $\text{CH}_2\text{Ar}$ ), 6.75 (d,  $J =$

4.0 Hz, 1H, H-8), 6.83 (dd,  $J = 4.0, 2.5$  Hz, 1H, H-7), 6.92 (td,  $J = 8.5, 2.5$  Hz, 1H, H-4'), 7.00 (br d,  $J = 9.5$  Hz, 1H, H-2'), 7.08 (d,  $J = 7.5$  Hz, 1H, H-6'), 7.24–7.30 (m, 1H, H-5'), 7.32–7.34 (m, 1H, H-6), 7.57 (s, 1H, H-4), 8.77 (s, 1H, H-1).  $^{13}\text{C}$  NMR (125 MHz,  $\text{CDCl}_3$ ):  $\delta$  40.7 (d,  $J_{\text{C,F}} = 1.75$  Hz,  $\text{CH}_2\text{Ar}$ ), 103.5 (C-8), 113.4 (d,  $J_{\text{C,F}} = 21.0$  Hz, C-4'), 114.8 (C-6), 115.0 (C-7), 115.9 (C-4), 116.0 (d,  $J_{\text{C,F}} = 21.1$  Hz, C-2'), 124.7 (d,  $J_{\text{C,F}} = 2.8$  Hz, C-6'), 127.4 (C-8a), 130.0 (d,  $J_{\text{C,F}} = 8.4$  Hz, C-5'), 137.9 (C-3), 141.7 (d,  $J_{\text{C,F}} = 7.3$  Hz, C-1'), 144.8 (C-1), 162.9 (d,  $J_{\text{C,F}} = 244.5$  Hz, C-3'). HRMS (EI):  $m/z$  [ $\text{M}^+$ ] calcd for  $\text{C}_{15}\text{H}_{11}\text{N}_2\text{F}$ : 226.0906; found: 226.0907.

**6-Bromo-3-(4-methoxybenzyl)pyrrolo[1,2-*a*]pyrazine (15c).** Following the method of preparation for **15a**, a mixture of **14d** (0.030 g, 0.13 mmol) and NBS (0.023 g, 0.13 mmol) in dry  $\text{CH}_2\text{Cl}_2$  (15 mL) furnished **15c** (0.03 g, 76%) as a dark brown oil.  $R_f$  0.31 (hexane/EtOAc, 7:3). IR (film):  $\bar{\nu}$  1616, 1508, 1439, 1296, 1248, 1239, 1178, 1032, 927, 820, 778, 745, 709  $\text{cm}^{-1}$ .  $^1\text{H}$  NMR (500 MHz,  $\text{CDCl}_3$ ):  $\delta$  3.79 (s, 3H,  $\text{CH}_3\text{O}$ ), 4.02 (s, 2H,  $\text{CH}_2\text{Ar}$ ), 6.79 (dd,  $J = 4.3, 0.5$  Hz, 1H, H-8), 6.84 (d,  $J = 4.3$  Hz, 1H, H-7), 6.85–6.89 (m, 2H, H-3'), 7.22–7.25 (m, 2H, H-2'), 7.62 (s, 1H, H-4), 8.69 (s, 1H, H-1).  $^{13}\text{C}$  NMR (125 MHz,  $\text{CDCl}_3$ ):  $\delta$  40.4 ( $\text{CH}_2\text{Ar}$ ), 55.3 ( $\text{CH}_3\text{O}$ ), 96.5 (C-6), 104.3 (C-8), 113.0 (C-4), 114.0 (C-3'), 116.9 (C-7), 128.4 (C-8a), 130.0 (C-2'), 131.0 (C-1'), 140.4 (C-3), 144.2 (C-1), 158.3 (C-4'). HRMS (EI):  $m/z$  [ $\text{M}^+$ ] calcd for  $\text{C}_{15}\text{H}_{13}\text{BrN}_2\text{O}$ : 316.0211; found: 316.0206.

**6-Bromo-3-(3-nitrobenzyl)pyrrolo[1,2-*a*]pyrazine (15d).** Following the method of preparation for **15a**, a mixture of **14h** (0.050 g, 0.20 mmol) and NBS (0.037 mg, 0.20 mmol) in dry  $\text{CH}_2\text{Cl}_2$  (15 mL) produced **15d** (0.048 g, 73%) as a pale yellow solid.  $R_f$  0.32 (hexane/EtOAc, 7:3); mp 153–155 °C. IR (film):  $\bar{\nu}$  1617, 1515, 1420, 1342, 1304, 1299, 1242, 1195, 1042, 912, 798, 737, 719, 690  $\text{cm}^{-1}$ .  $^1\text{H}$  NMR (500 MHz,  $\text{CDCl}_3$ ):  $\delta$  4.16 (s, 2H,  $\text{CH}_2\text{Ar}$ ), 6.85 (d,  $J = 4.3$  Hz, 1H, H-8), 6.90 (d,  $J = 4.3$  Hz, 1H, H-7), 7.50 (t,  $J = 7.8$  Hz, 1H, H-5'), 7.69 (br d,  $J = 7.8$  Hz, 1H, H-6'), 7.78 (s, 1H, H-4), 8.02–8.14 (br d,  $J = 7.8$  Hz, 1H, H-4'), 8.17 (br s, 1H, H-2'), 8.70 (s, 1H, H-1).  $^{13}\text{C}$  NMR (125 MHz,  $\text{CDCl}_3$ ):  $\delta$  40.7 ( $\text{CH}_2\text{Ar}$ ), 97.0 (C-6), 104.9 (C-8), 113.5 (C-4), 117.3 (C-7), 121.7 (C-4'), 123.9 (C-2'), 128.4 (C-8a), 129.4 (C-5'), 135.3 (C-6'), 138.2 (C-3), 141.3 (C-1'), 144.6 (C-1), 148.4 (C-3'). HRMS (EI):  $m/z$  [ $\text{M}^+$ ] calcd for  $\text{C}_{14}\text{H}_{10}\text{BrN}_3\text{O}_2$ : 330.9956; found: 330.9920.

**6,7-Dibromo-3-(4-methoxybenzyl)pyrrolo[1,2-*a*]pyrazine (16b).** Following the method of preparation for **16a**, a mixture of **14d** (0.040 g, 0.17 mmol) and NBS (0.060 mg, 0.34 mmol) in dry  $\text{CH}_2\text{Cl}_2$  (15 mL) yielded **16b** (0.04 g, 61%) as a dark brown solid.  $R_f$  0.61 (hexane/EtOAc, 7:3); mp 115–117 °C. IR (film):  $\bar{\nu}$  1608, 1508, 1430, 1316, 1293, 1240, 1177, 1033, 819, 810, 760  $\text{cm}^{-1}$ .  $^1\text{H}$  NMR (600 MHz,  $\text{CDCl}_3$ ):  $\delta$  3.79 (s, 3H,  $\text{OCH}_3$ ), 4.02 (s, 2H,  $\text{CH}_2\text{Ar}$ ), 6.85 (s, 1H, H-8), 6.87 (br d,  $J =$



8.7 Hz, 2H, H-3'), 7.22 (d,  $J = 8.7$  Hz, 2H, H-2'), 7.55 (s, 1H, H-4), 8.67 (s, 1H, H-1).  $^{13}\text{C}$  NMR (150 MHz,  $\text{CDCl}_3$ ):  $\delta$  40.4 ( $\text{CH}_2\text{Ar}$ ), 55.3 ( $\text{OCH}_3$ ), 90.7 (C-7), 96.4 (C-6), 112.9 (C-4), 114.1 (C-3'), 118.3 (C-8), 126.2 (C-8a), 130.0 (C-2'), 130.6 (C-1'), 141.1 (C-3), 143.1 (C-1), 158.4 (C-4'). HRMS (EI):  $m/z$  [ $\text{M}^+$ ] calcd for  $\text{C}_{15}\text{H}_{12}\text{Br}_2\text{N}_2\text{O}$ : 393.9316; found: 393.9313.

**3-Methyl-6-(*p*-tolyl)pyrrolo[1,2-*a*]pyrazine (17a).** In a threaded ACE glass pressure tube equipped with a sealed Teflon screw cap and a magnetic stirring bar, a mixture of **14a** (0.040 g, 0.30 mmol), 4-iodotoluene (0.098 g, 0.45 mmol),  $\text{Pd}(\text{PPh}_3)_4$  (0.023 g, 0.02 mmol), and KOAc (0.060 g, 0.61 mmol) in dry DMAc (2 mL) was heated at 150 °C for 24 h. A 5% aqueous solution of HCl (2 mL) was then added and stirred for 5 min. The mixture was extracted with EtOAc (30 mL) and washed with water (20 mL). The organic layer was dried ( $\text{Na}_2\text{SO}_4$ ) and the solvent removed under vacuum. The residue was purified by column chromatography over silica gel (20 g/g crude, hexane/EtOAc, 1:1) to obtain **17a** (0.02 g, 30%) as a dark brown solid.  $R_f$  0.17 (hexane/EtOAc, 7:3); mp 103–105 °C. IR (film):  $\bar{\nu}$  1621, 1473, 1448, 1385, 1323, 1241, 1194, 1038, 915, 801, 780, 767, 715  $\text{cm}^{-1}$ .  $^1\text{H}$  NMR (500 MHz,  $\text{CDCl}_3$ ):  $\delta$  2.38 (d,  $J = 1.0$  Hz, 3H,  $\text{CH}_3$ -3), 2.43 (s, 3H,  $\text{CH}_3\text{Ar}$ ), 6.82 (d,  $J = 4.2$  Hz, 1H, H-8), 6.86 (d,  $J = 4.2$  Hz, 1H, H-7), 7.31 (d,  $J = 8.0$  Hz, 2H, H-3'), 7.45 (d,  $J = 8.0$  Hz, 2H, H-2'), 7.90 (s, 1H, H-4), 8.76 (s, 1H, H-1).  $^{13}\text{C}$  NMR (125 MHz,  $\text{CDCl}_3$ ):  $\delta$  21.1 ( $\text{CH}_3$ -3), 21.3 ( $\text{CH}_3\text{Ar}$ ), 104.1 (C-8), 111.7 (C-4), 114.8 (C-7), 127.9 (C-6), 128.0 (C-2'), 128.3 (C-8a), 129.1 (C-1'), 129.8 (C-3'), 135.7 (C-3), 137.9 (C-4'), 144.7 (C-1). HRMS (EI):  $m/z$  [ $\text{M}^+$ ] calcd for  $\text{C}_{15}\text{H}_{14}\text{N}_2$ : 222.1157; found: 222.1157.

**3-Methyl-6-(3-nitrophenyl)pyrrolo[1,2-*a*]pyrazine (17b).** Following the method of preparation for **17a**, a mixture of **14a** (0.040 g, 0.30 mmol), 1-iodo-3-nitrobenzene (0.112 g, 0.45 mmol),  $\text{Pd}(\text{PPh}_3)_4$  (0.023 g, 0.02 mmol), and KOAc (0.060 g, 0.61 mmol) in dry DMAc (2 mL) provided **17b** (0.05 g, 65%) as a pale yellow solid.  $R_f$  0.16 (hexane/EtOAc, 7:3); mp 169–171 °C. IR (film):  $\bar{\nu}$  1621, 1542, 1526, 1506, 1343, 1325, 1241, 1197, 919, 797, 736, 728, 685  $\text{cm}^{-1}$ .  $^1\text{H}$  NMR (500 MHz,  $\text{CDCl}_3$ ):  $\delta$  2.44 (s, 3H,  $\text{CH}_3$ ), 6.88 (dd,  $J = 4.3, 0.7$  Hz, 1H, H-8), 6.99 (d,  $J = 4.3$  Hz, 1H, H-7), 7.70 (t,  $J = 8.0$  Hz, 1H, H-5'), 7.89–7.92 (m, 2H, H-4, H-6'), 8.22 (br d,  $J = 8.0$  Hz, 1H, H-4'), 8.43 (t,  $J = 2.0$  Hz, 1H, H-2'), 8.83 (s, 1H, H-1).  $^{13}\text{C}$  NMR (125 MHz,  $\text{CDCl}_3$ ):  $\delta$  21.2 ( $\text{CH}_3$ ), 104.7 (C-8), 111.2 (C-4), 115.9 (C-7), 122.4 (C-4'), 122.5 (C-2'), 124.4 (C-6), 128.7 (C-8a), 130.2 (C-5'), 133.0 (C-1'), 133.5 (C-6'), 137.0 (C-3), 145.1 (C-1), 148.9 (C-3'). HRMS (EI):  $m/z$  [ $\text{M}^+$ ] calcd for  $\text{C}_{14}\text{H}_{11}\text{N}_3\text{O}_2$ : 253.0851; found: 253.0849.

**3-Methyl-6-phenylpyrrolo[1,2-*a*]pyrazine (17d).** In a threaded ACE glass pressure tube equipped with a sealed Teflon screw cap and a magnetic stirring bar, a mixture of **15a** (0.051 g, 0.24 mmol), phenylboronic acid (0.044 g, 0.36 mmol),  $\text{Pd}(\text{OAc})_2$  (0.002 g, 0.01 mmol), and  $\text{K}_2\text{CO}_3$  (0.050 g, 0.36

mmol) in a solution of DMF/EtOH (1:1, 1.0 mL) was heated at 70 °C for 8 h. A solution of brine (20 mL) was added and the mixture extracted with EtOAc (40 mL), the organic layer dried (Na<sub>2</sub>SO<sub>4</sub>), and the solvent removed under vacuum. The residue was purified by column chromatography over silica gel (20 g/g crude, hexane/EtOAc, 1:1) to furnish **17d** (0.021 g, 41%) as a yellow solid. *R<sub>f</sub>* 0.17 (hexane/EtOAc, 7:3); mp 97–99 °C. IR (film):  $\bar{\nu}$  1620, 1601, 1441, 1407, 1385, 1323, 1275, 1195, 915, 751, 697 cm<sup>-1</sup>. <sup>1</sup>H NMR (500 MHz, CDCl<sub>3</sub>):  $\delta$  2.42 (s, 3H, CH<sub>3</sub>), 6.92–6.96 (m, 2H, H-7, H-8), 7.38–7.45 (m, 2H, H-2'), 7.50–7.60 (m, 3H, H-3', H-4'), 7.92 (s, 1H, H-4), 8.93 (s, 1H, H-1). <sup>13</sup>C NMR (125 MHz, CDCl<sub>3</sub>):  $\delta$  20.7 (CH<sub>3</sub>), 105.5 (C-8), 112.2 (C-4), 115.7 (C-7), 127.5 (C-6), 127.9 (C-8a), 128.1 (C-2'), 128.2 (C-4'), 129.2 (C-3'), 131.0 (C-1'), 135.3 (C-3), 144.0 (C-1). HRMS (EI): *m/z* [M<sup>+</sup>] calcd for C<sub>14</sub>H<sub>12</sub>N<sub>2</sub>: 208.1001; found: 208.1001.

**6-(4-Methoxyphenyl)-3-(3-nitrobenzyl)pyrrolo[1,2-*a*]pyrazine (17f).** Following the method of preparation for **17d**, a mixture of **15d** (0.050 g, 0.15 mmol), (4-methoxyphenyl)boronic acid (0.035 g, 0.23 mmol), Pd(OAc)<sub>2</sub> (0.0016 g, 0.007 mmol), and K<sub>2</sub>CO<sub>3</sub> (0.043 g, 0.31 mmol) produced **17f** (0.04 g, 74%) as a dark yellow solid. *R<sub>f</sub>* 0.21 (hexane/EtOAc, 7:3); mp 185–187 °C. IR (film):  $\bar{\nu}$  1611, 1520, 1475, 1348, 1242, 1180, 1035, 922, 837, 804, 768, 699 cm<sup>-1</sup>. <sup>1</sup>H NMR (500 MHz, CDCl<sub>3</sub>):  $\delta$  3.89 (s, 3H, CH<sub>3</sub>O), 4.06 (s, 2H, CH<sub>2</sub>Ar), 6.85–6.89 (m, 2H, H-7, H-8), 7.03–7.07 (m, 2H, H-3''), 7.43–7.49 (m, 3H, H-5', H-2''), 7.65 (br d, *J* = 7.5 Hz, 1H, H-6'), 7.96 (s, 1H, H-4), 8.07 (br d, *J* = 7.5 Hz, 1H, H-4'), 8.13 (br s, 1H, H-2'), 8.77 (s, 1H, H-1). <sup>13</sup>C NMR (125 MHz, CDCl<sub>3</sub>):  $\delta$  40.7 (CH<sub>2</sub>Ar), 55.4 (CH<sub>3</sub>O), 104.7 (C-8), 112.8 (C-4), 114.7 (C-3''), 115.3 (C-7), 121.6 (C-4'), 123.2 (C-1''), 123.7 (C-2'), 127.8 (C-8a), 128.0 (C-6), 129.3 (C-5'), 129.5 (C-2''), 135.2 (C-6'), 137.2 (C-3), 141.7 (C-1'), 145.5 (C-1), 148.4 (C-3'), 159.6 (C-4''). HRMS (EI): *m/z* [M<sup>+</sup>] calcd for C<sub>21</sub>H<sub>17</sub>N<sub>3</sub>O<sub>3</sub>: 359.1270; found: 359.1270.

## References

- 1 N. Menges, O. Sari, Y. Abdullayev, S. S. Erdem and M. Balci, *J. Org. Chem.*, 2013, **78**, 5184–5195.
- 2 S. Guven, M. S. Ozer, S. Kaya, N. Menges and M. Balci, *Org. Lett.*, 2015, **17**, 2660–2663.
- 3 O. Sari, A. F. Seybek, S. Kaya, N. Menges, S. S. Erdem and M. Balci, *Eur. J. Org. Chem.*, 2019, 5261–5274.

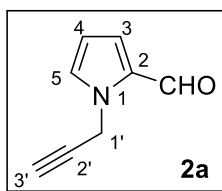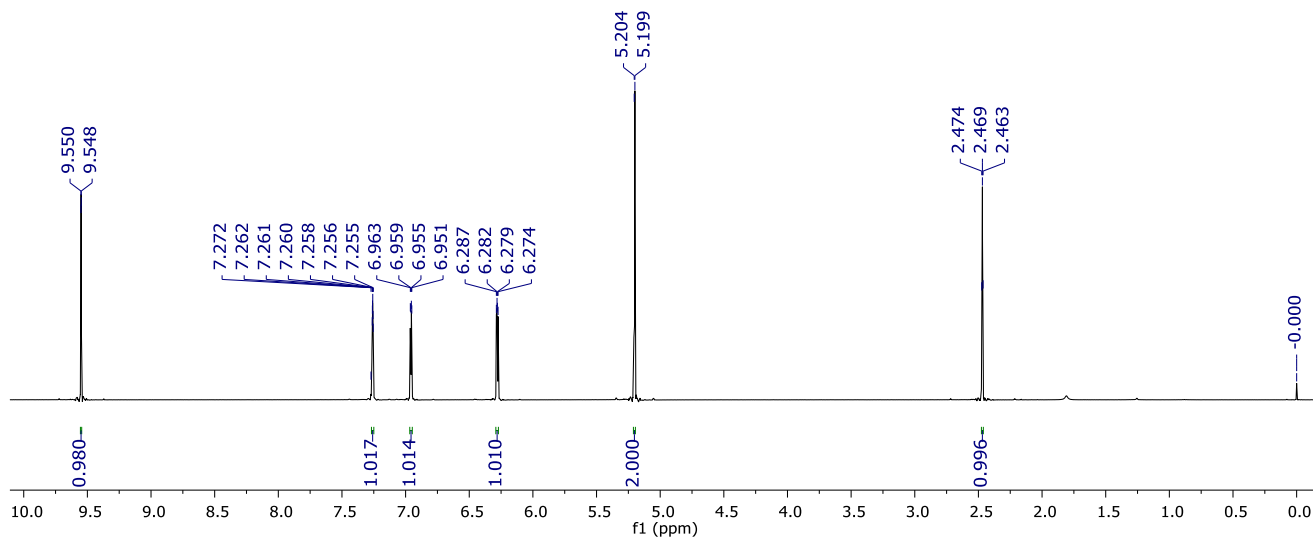

<sup>1</sup>H NMR (500 MHz, CDCl<sub>3</sub>) of compound **2a**.

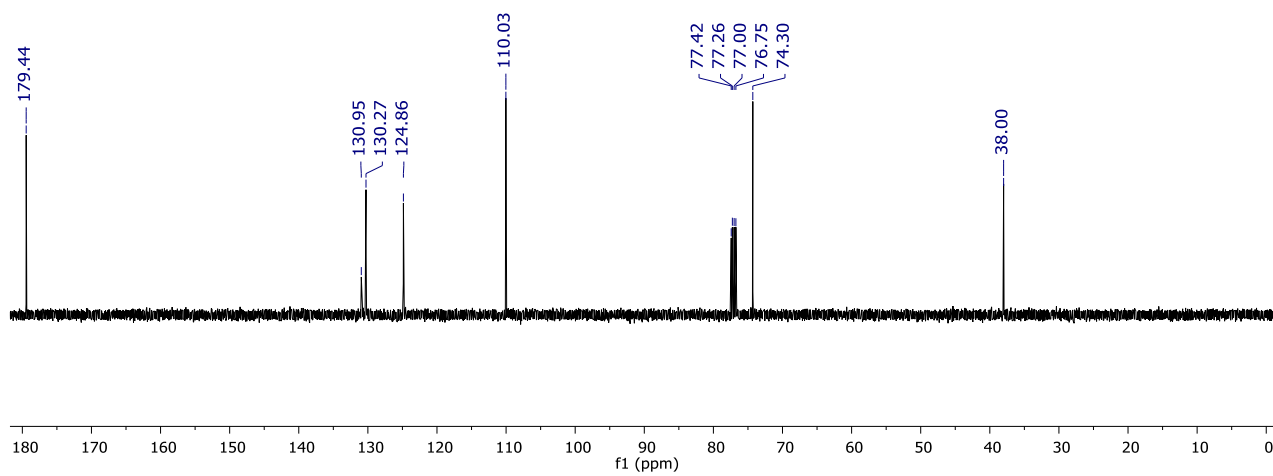

<sup>13</sup>C NMR (125 MHz, CDCl<sub>3</sub>) of compound **2a**.

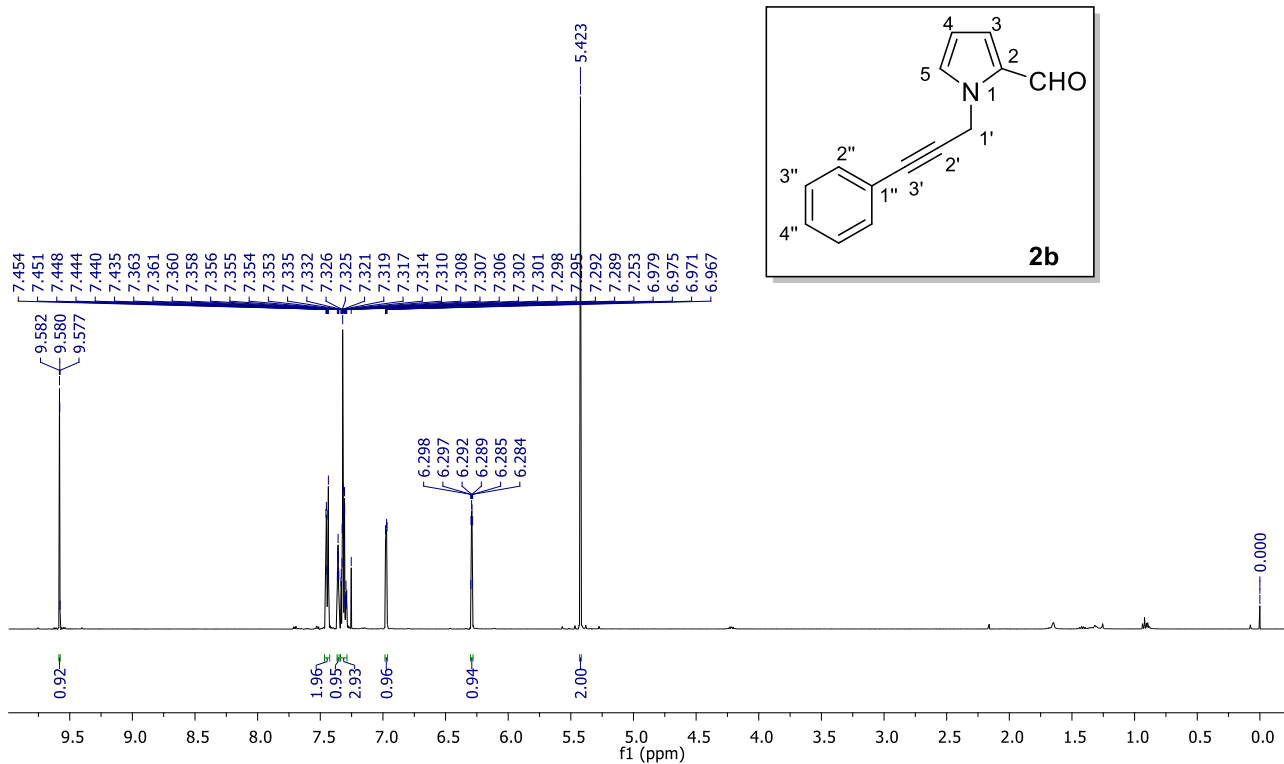

**1H NMR (500 MHz, CDCl<sub>3</sub>) of compound **2b**.**

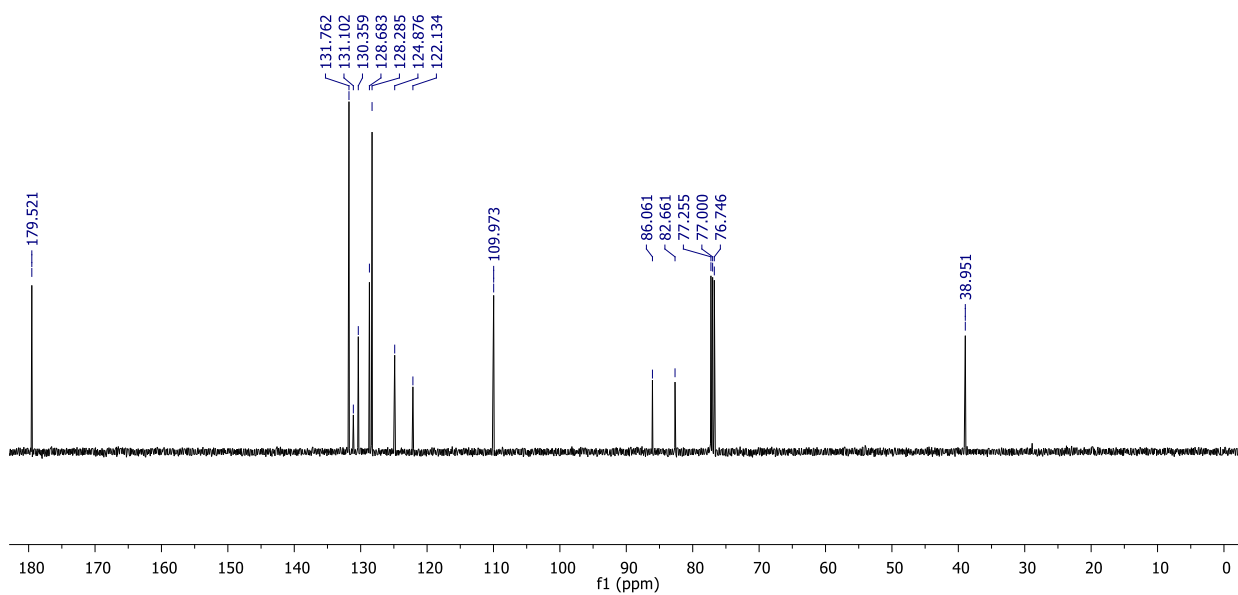

**13C NMR (125 MHz, CDCl<sub>3</sub>) of compound **2b**.**

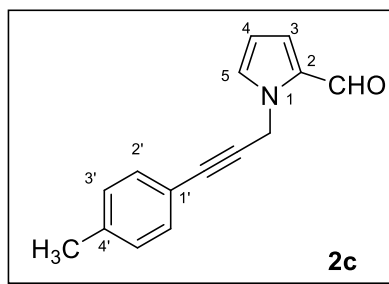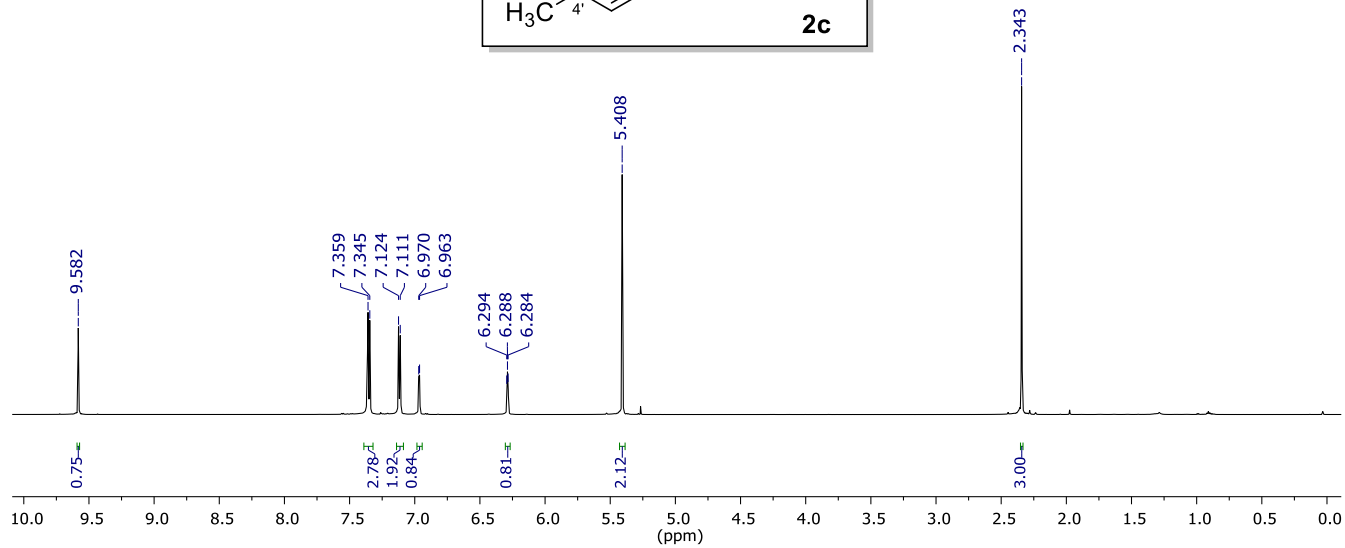

$^1\text{H}$  NMR (500 MHz,  $\text{CDCl}_3$ ) of compound **2c**.

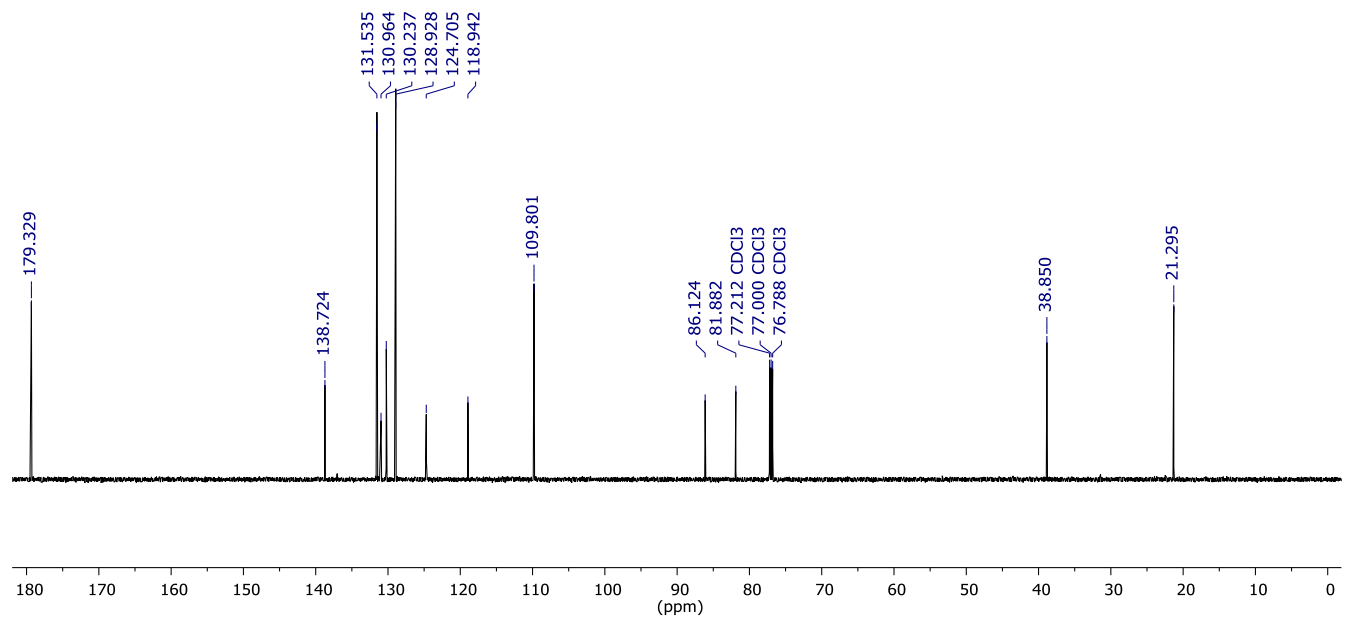

$^{13}\text{C}$  NMR (125 MHz,  $\text{CDCl}_3$ ) of compound **2c**.

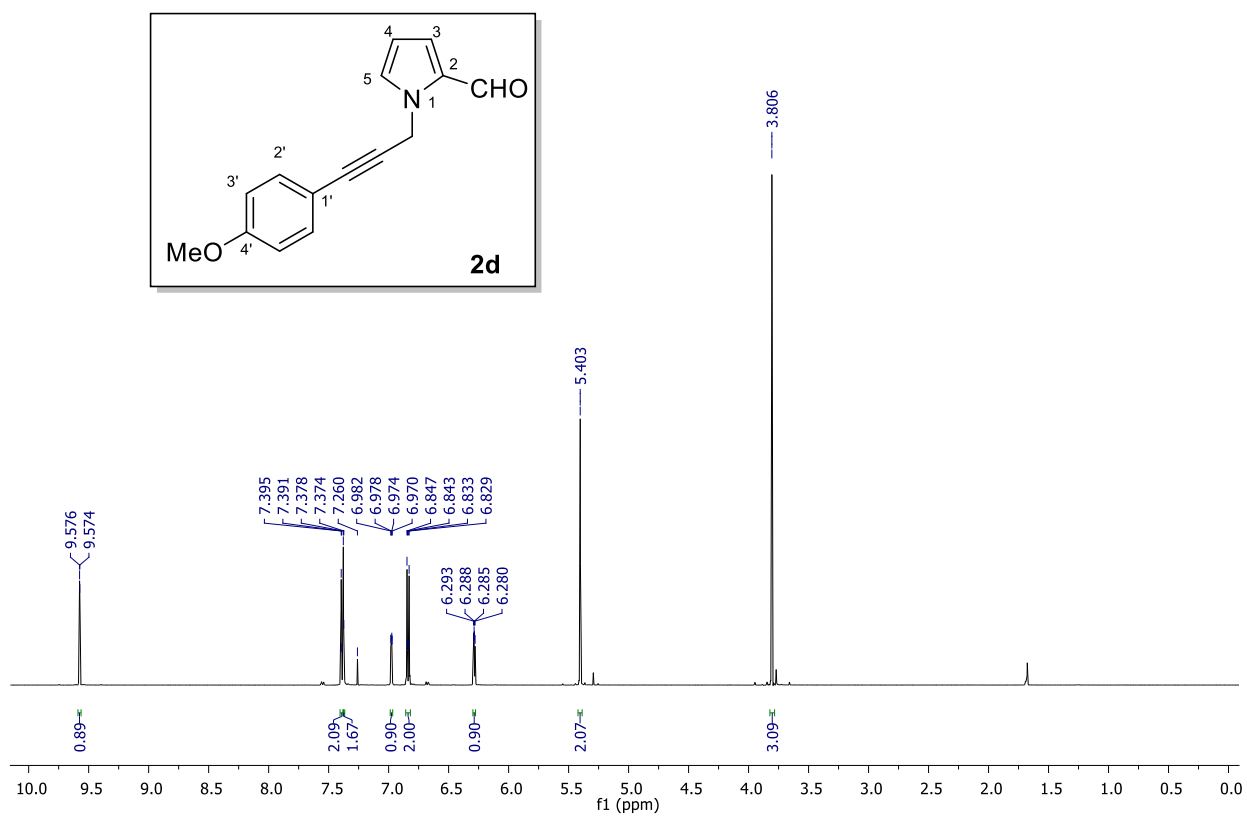

<sup>1</sup>H NMR (500 MHz, CDCl<sub>3</sub>) of compound **2d**.

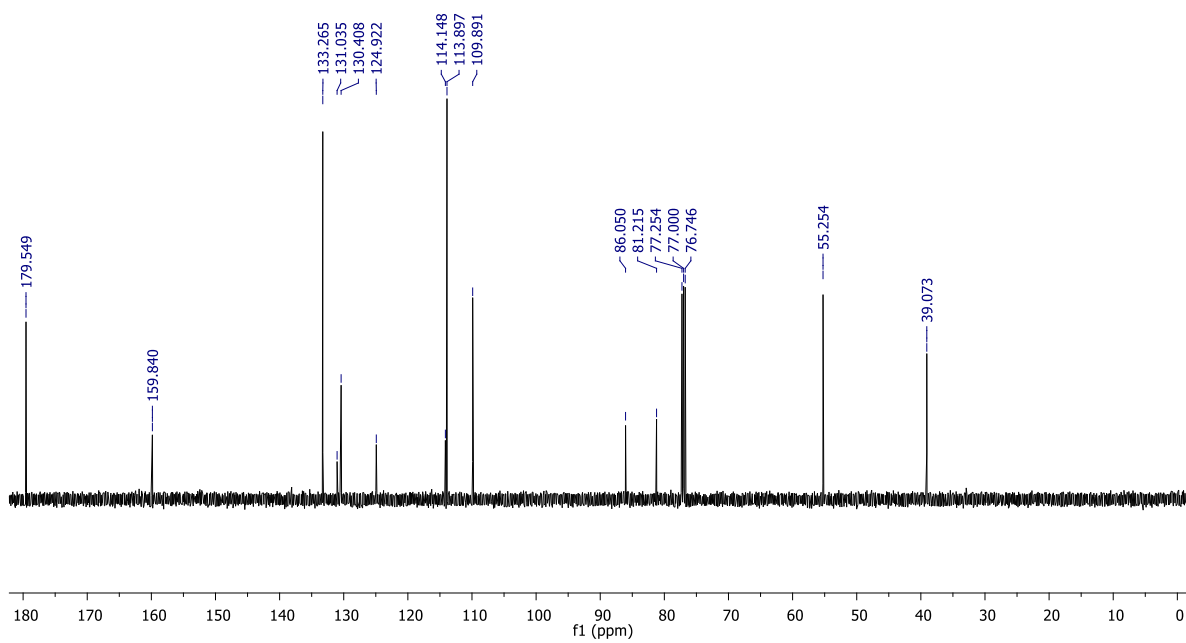

<sup>13</sup>C NMR (125 MHz, CDCl<sub>3</sub>) of compound **2d**.

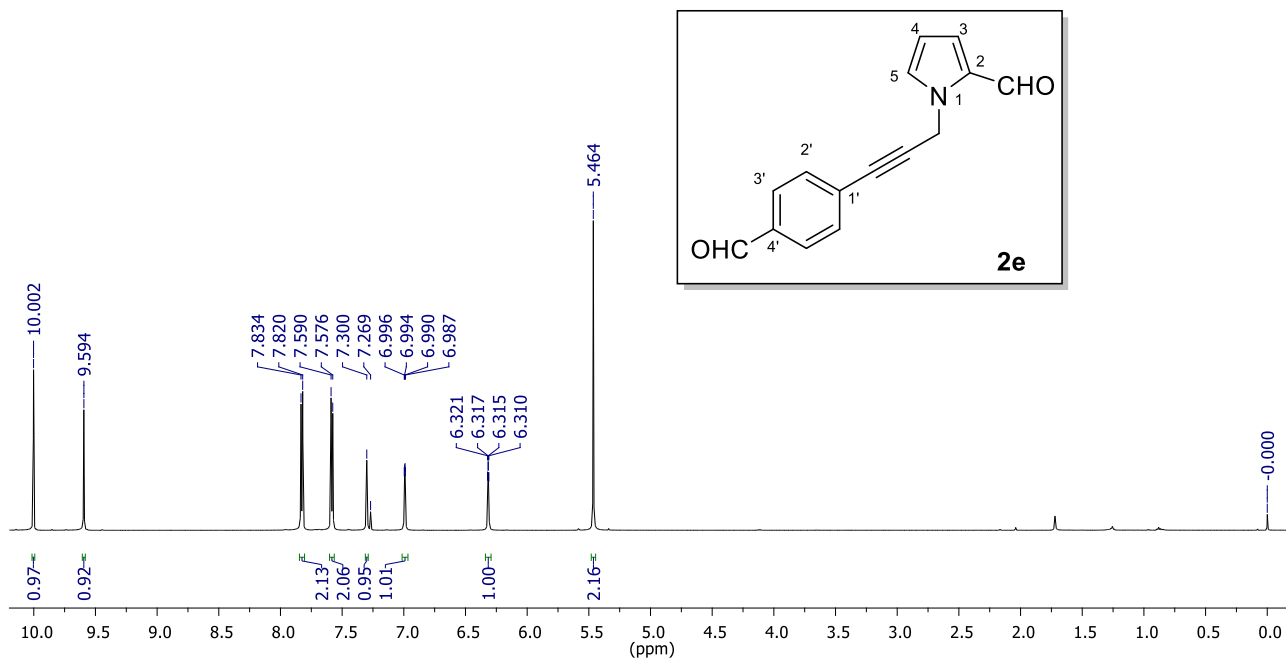

**<sup>1</sup>H NMR (500 MHz, CDCl<sub>3</sub>) of compound **2e**.**

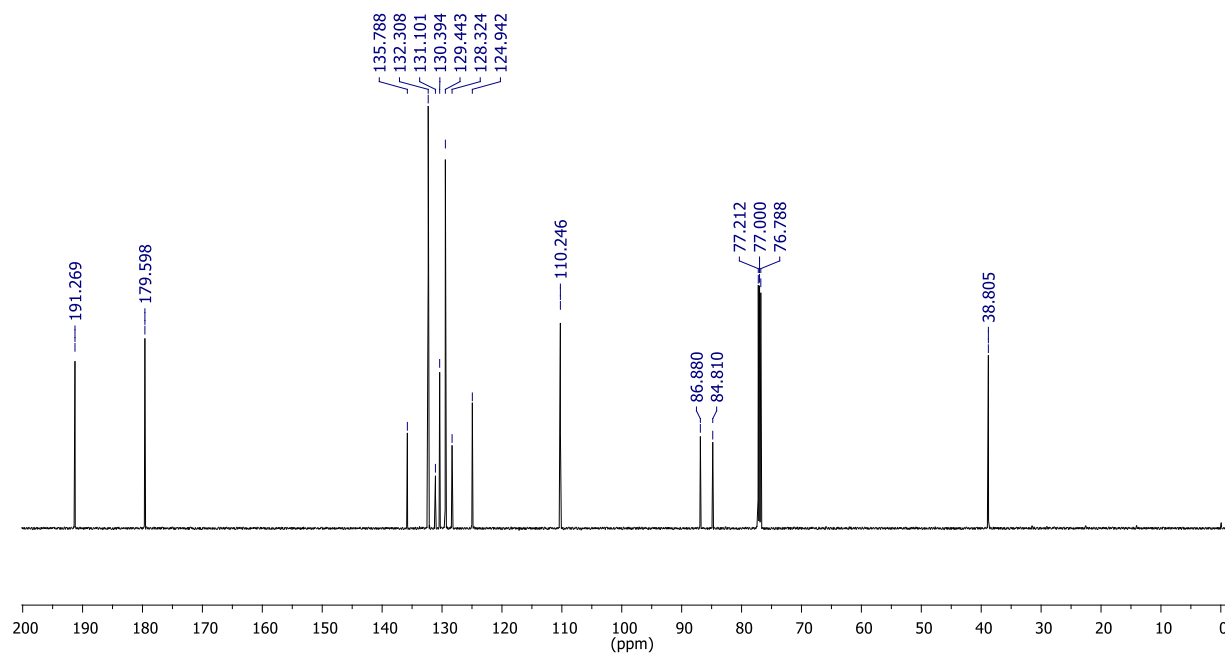

**<sup>13</sup>C NMR (125 MHz, CDCl<sub>3</sub>) of compound **2e**.**

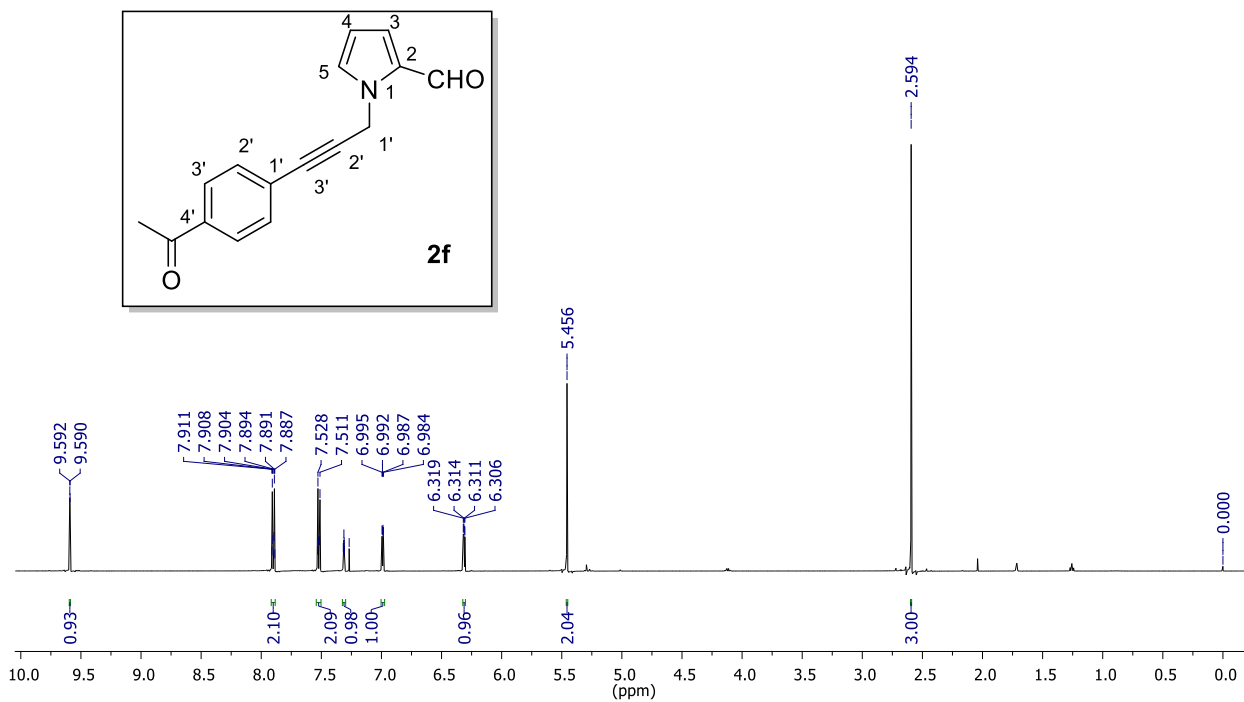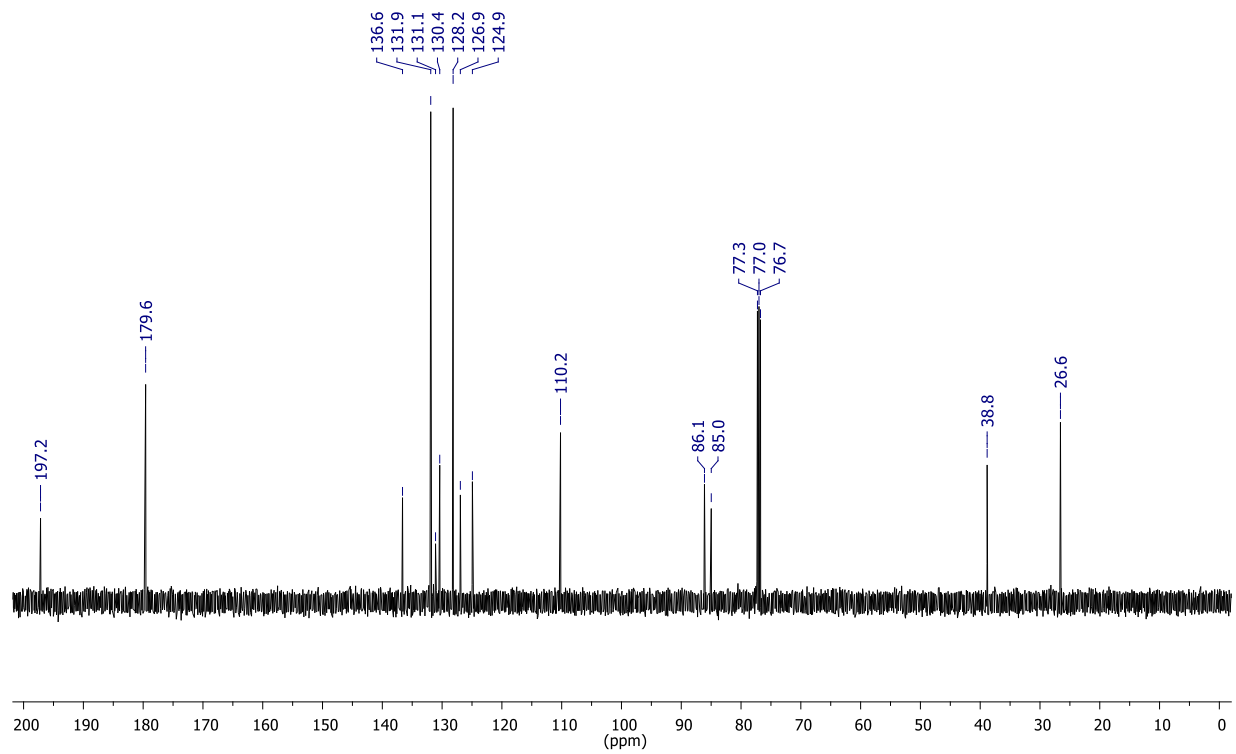



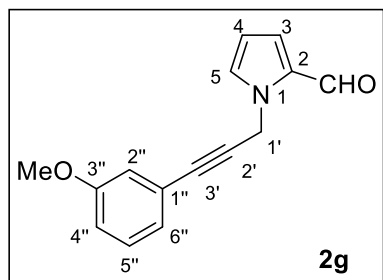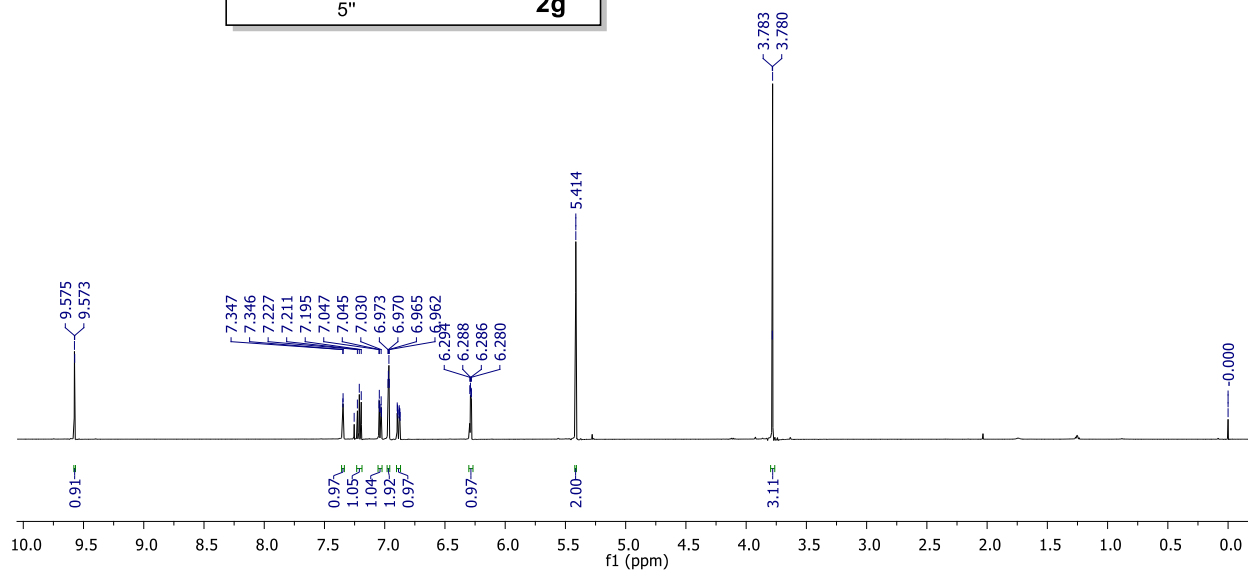

<sup>1</sup>H NMR (500 MHz, CDCl<sub>3</sub>) of compound **2g**.

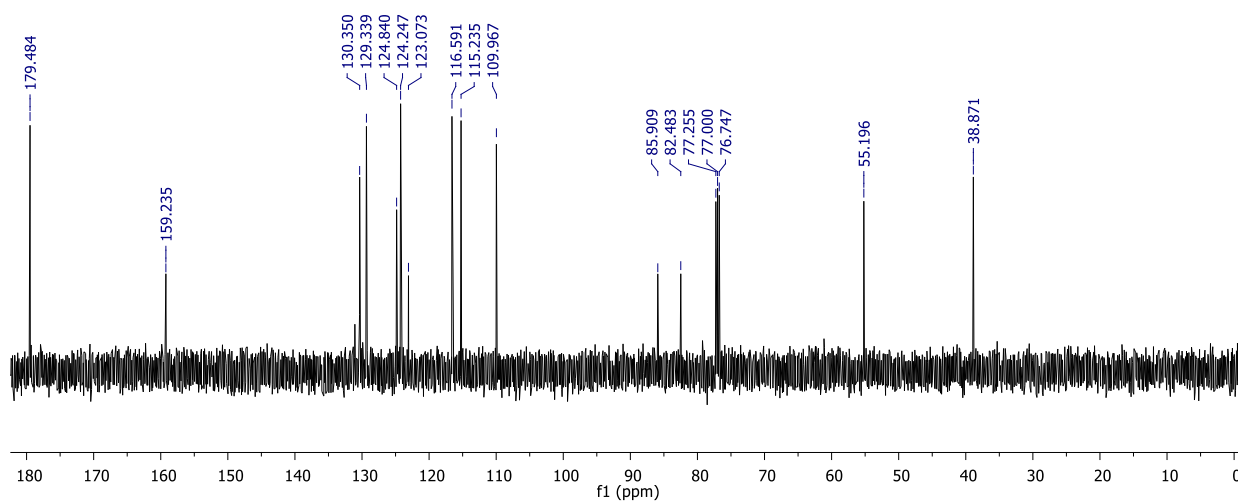

<sup>13</sup>C NMR (125 MHz, CDCl<sub>3</sub>) of compound **2g**.

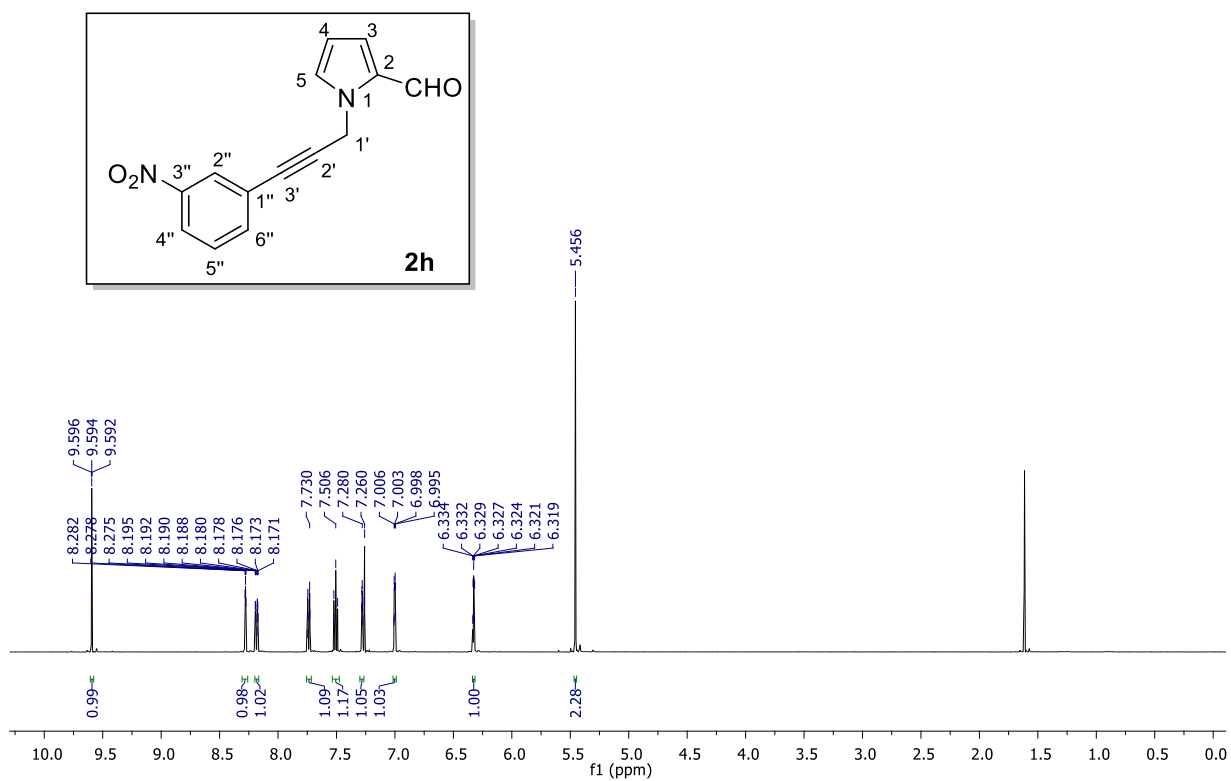

<sup>1</sup>H NMR (500 MHz, CDCl<sub>3</sub>) of compound **2h**.

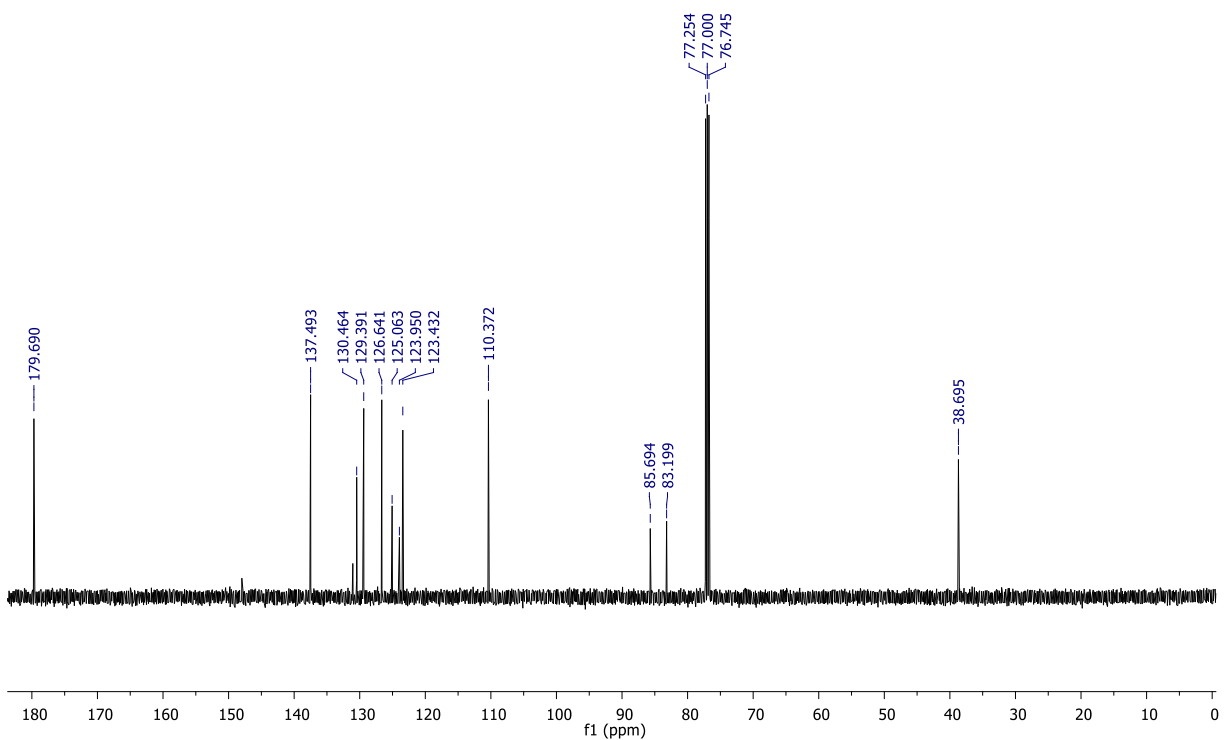

<sup>13</sup>C NMR (125 MHz, CDCl<sub>3</sub>) of compound **2h**.

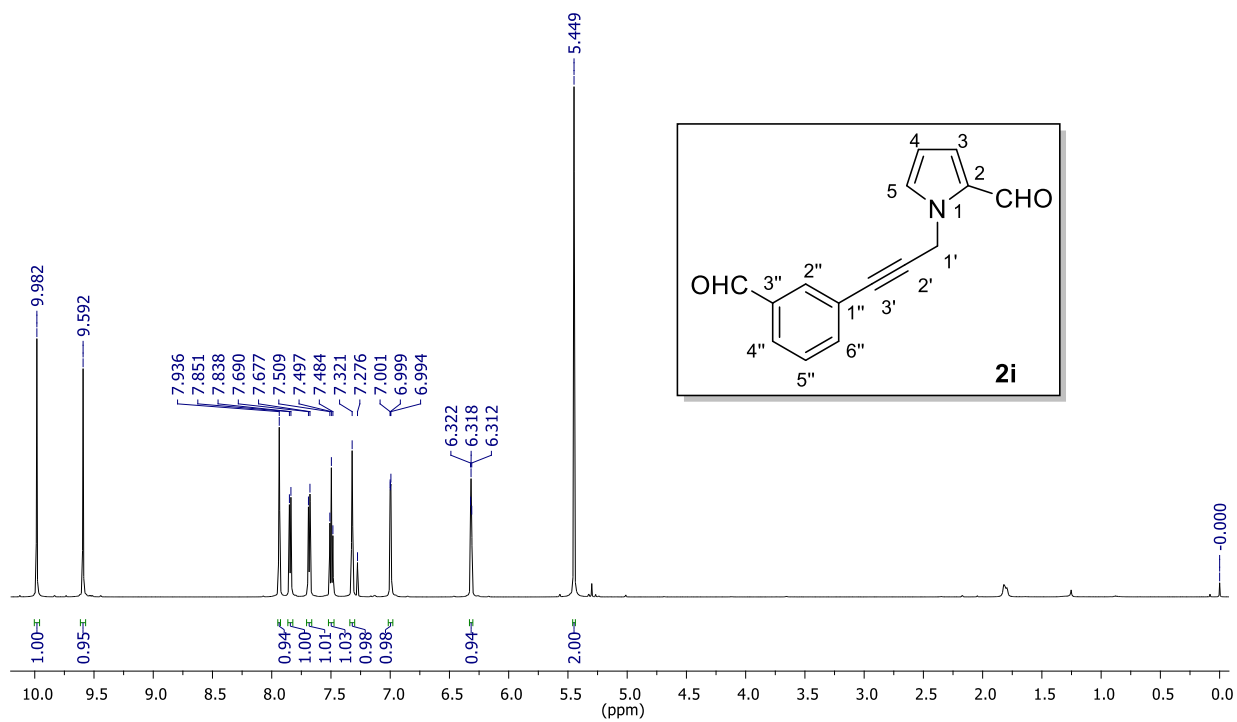

**<sup>1</sup>H NMR (600 MHz, CDCl<sub>3</sub>) of compound **2i**.**

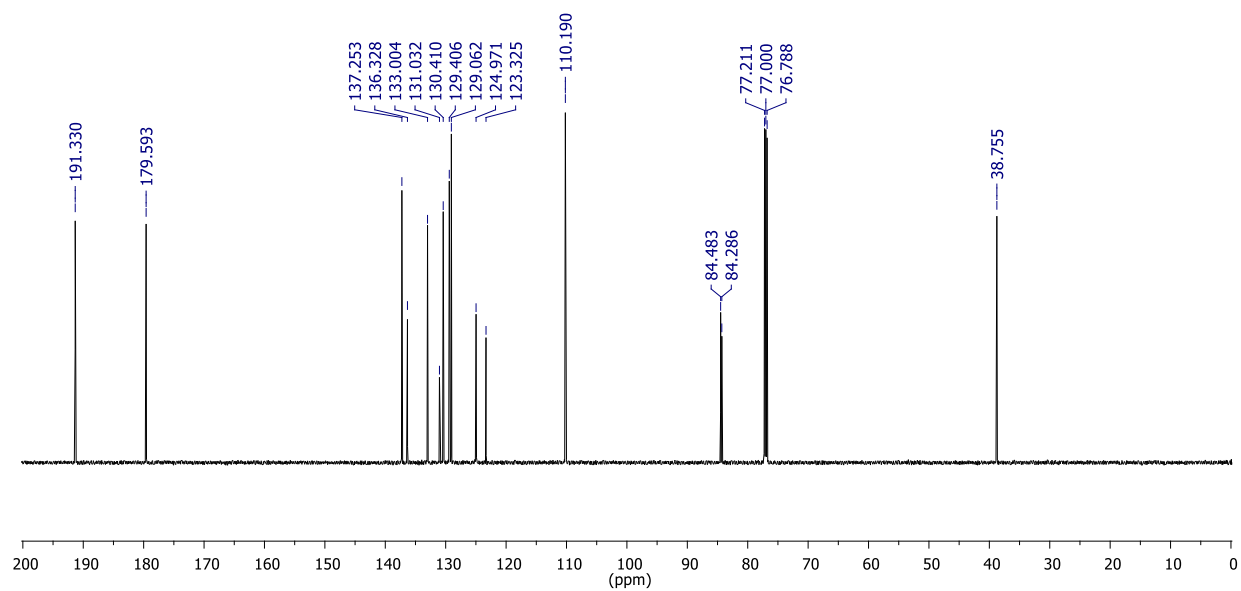

**<sup>13</sup>C NMR (150 MHz, CDCl<sub>3</sub>) of compound **2i**.**

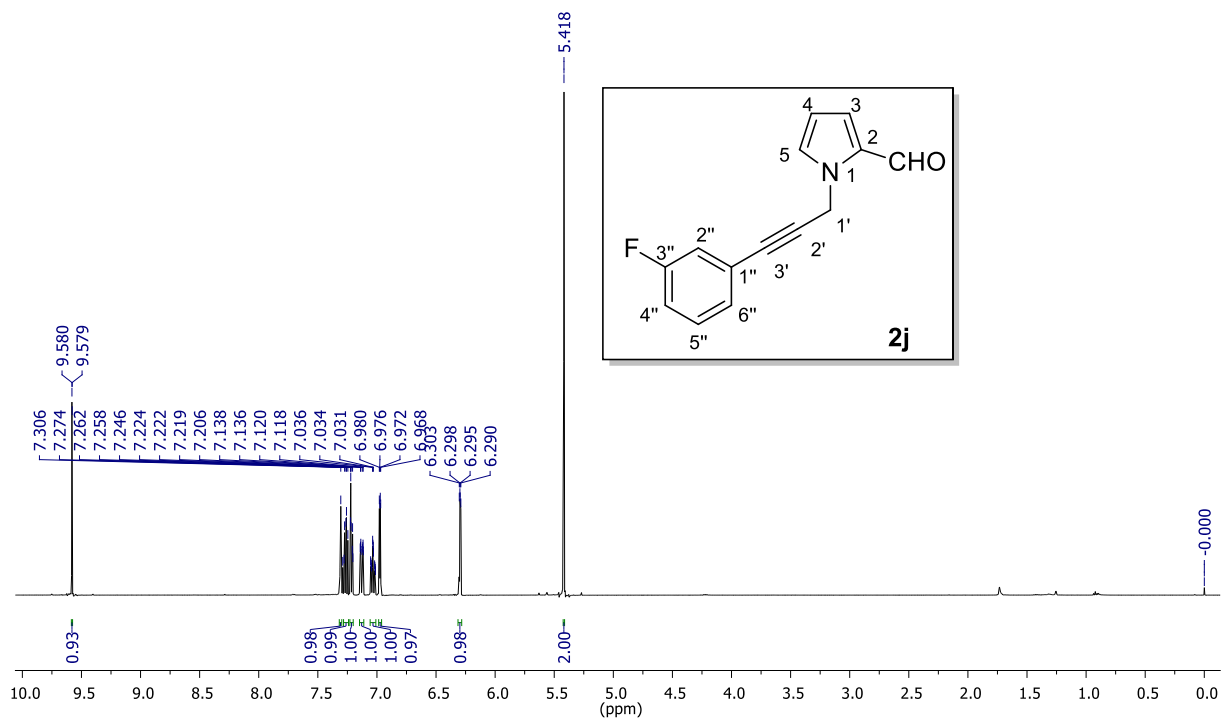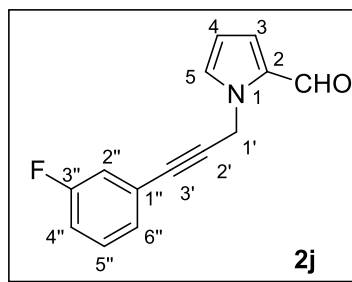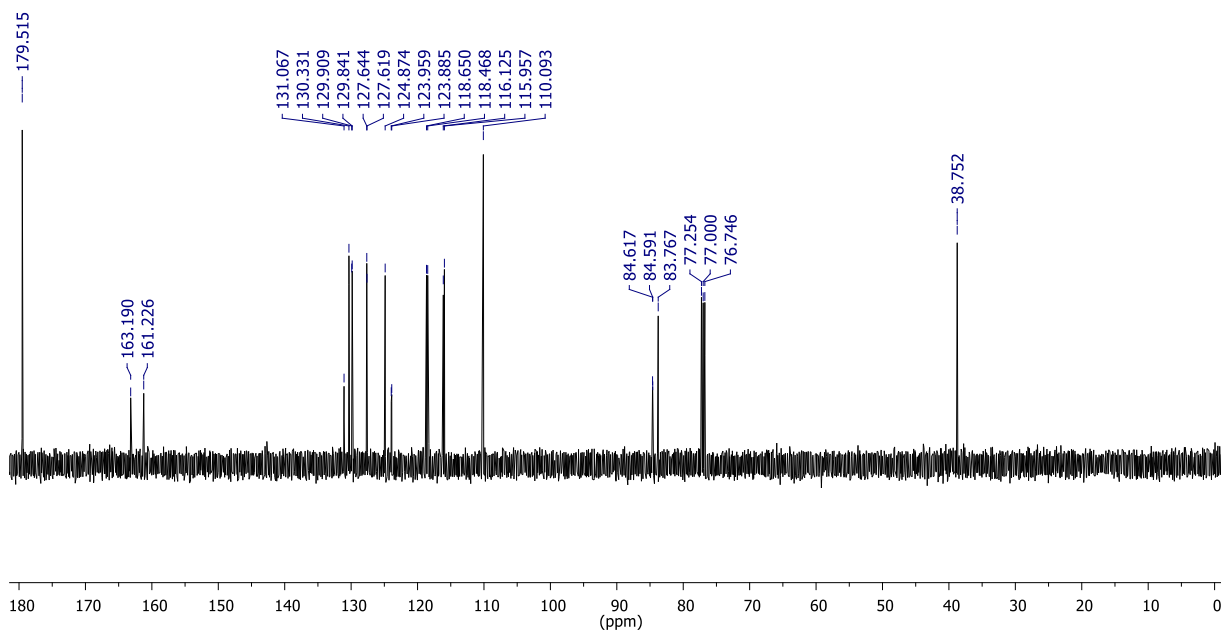

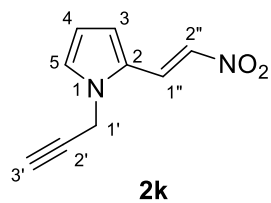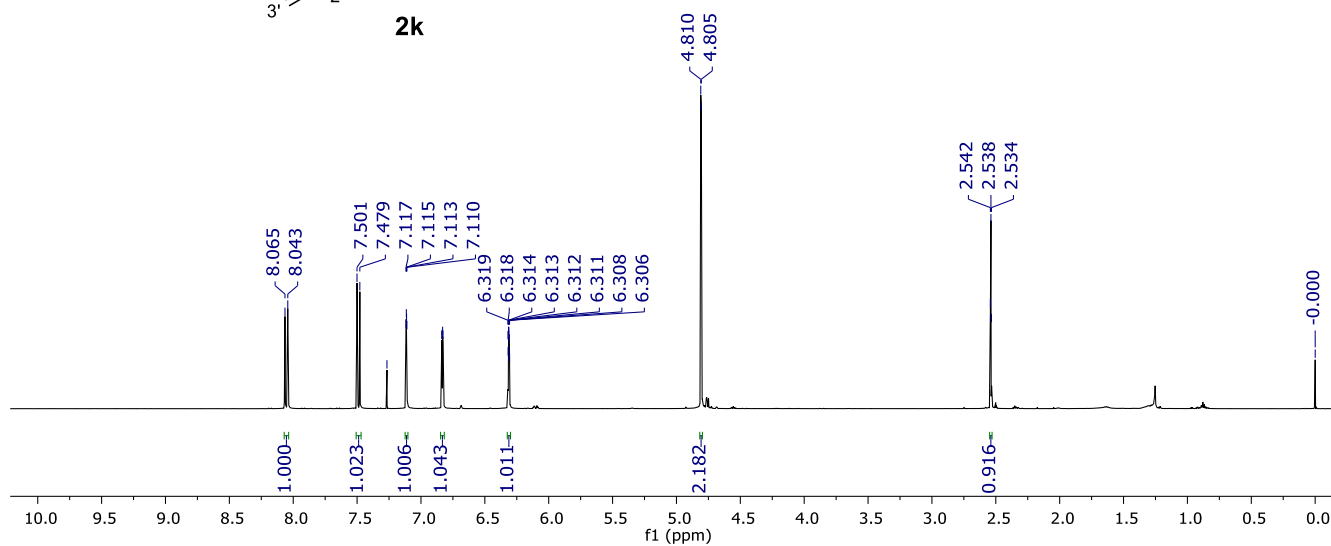

<sup>1</sup>H NMR (600 MHz, CDCl<sub>3</sub>) of compound **2k**.

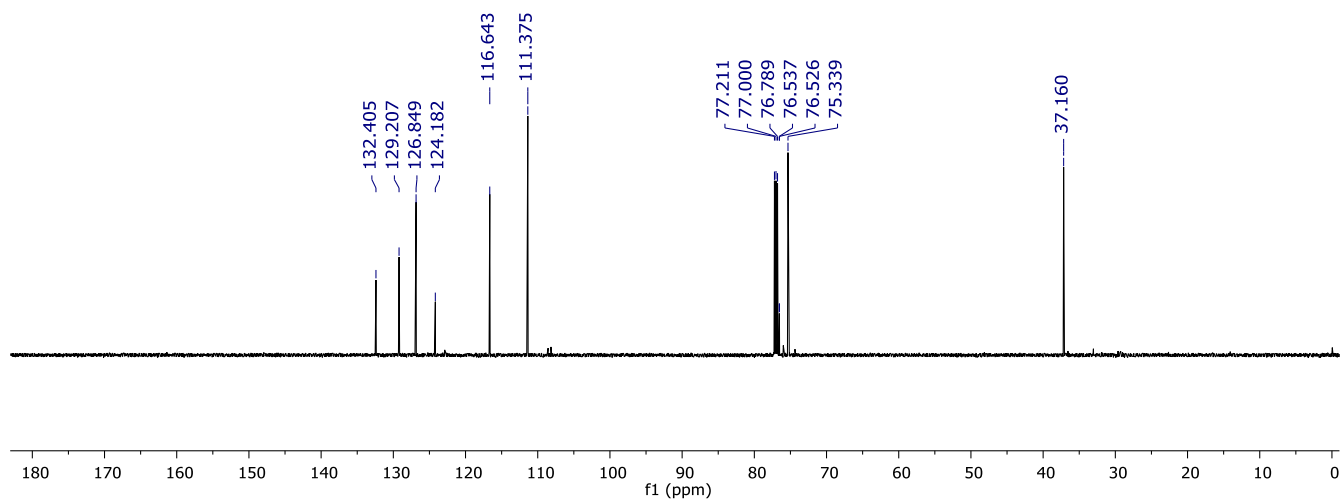

<sup>13</sup>C NMR (150 MHz, CDCl<sub>3</sub>) of compound **2k**.

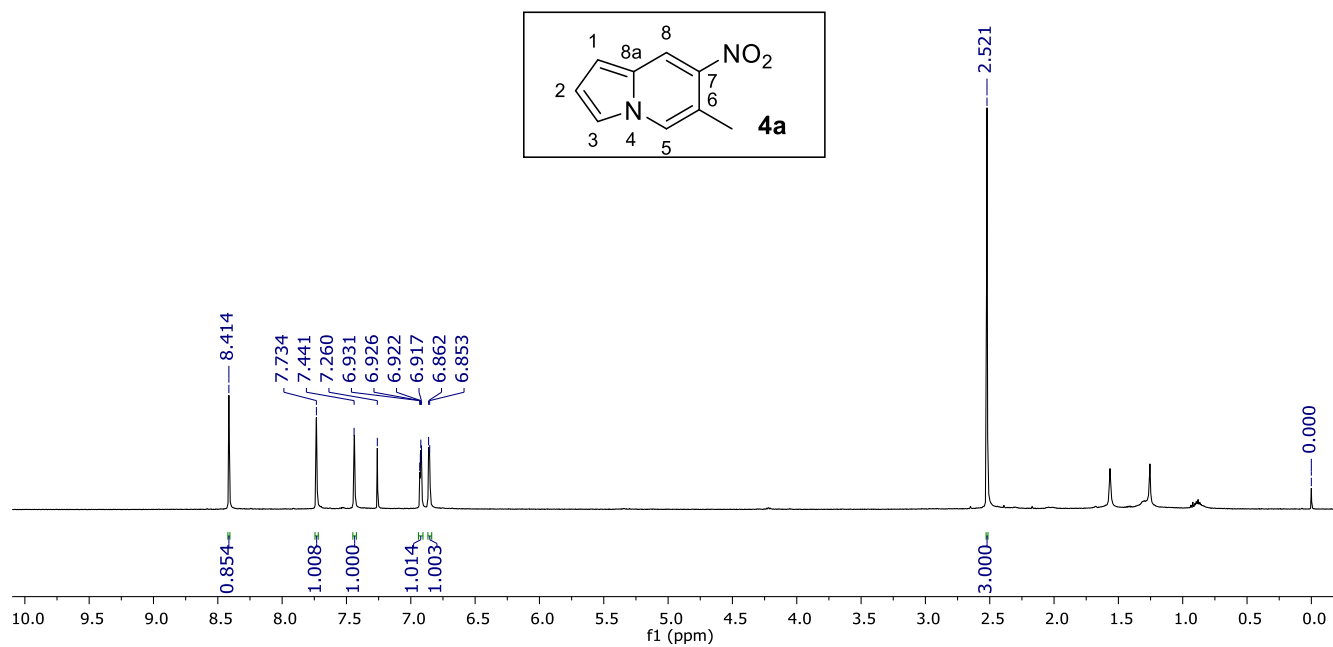

$^1\text{H}$  NMR (500 MHz,  $\text{CDCl}_3$ ) of compound **4a**.

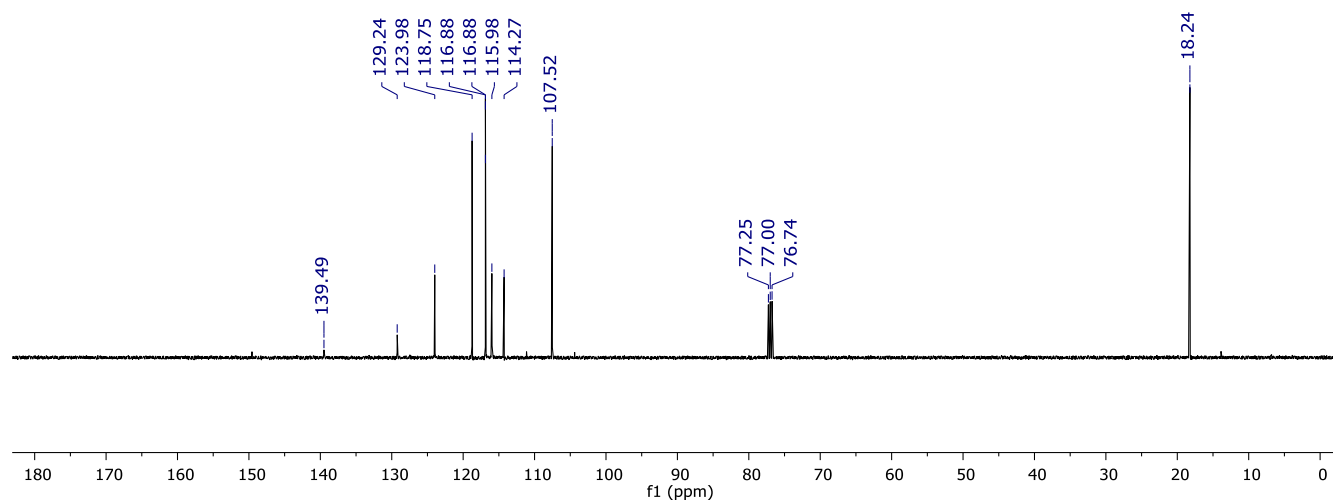

$^{13}\text{C}$  NMR (125 MHz,  $\text{CDCl}_3$ ) of compound **4a**.

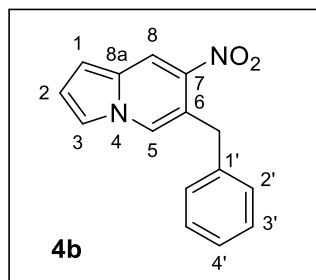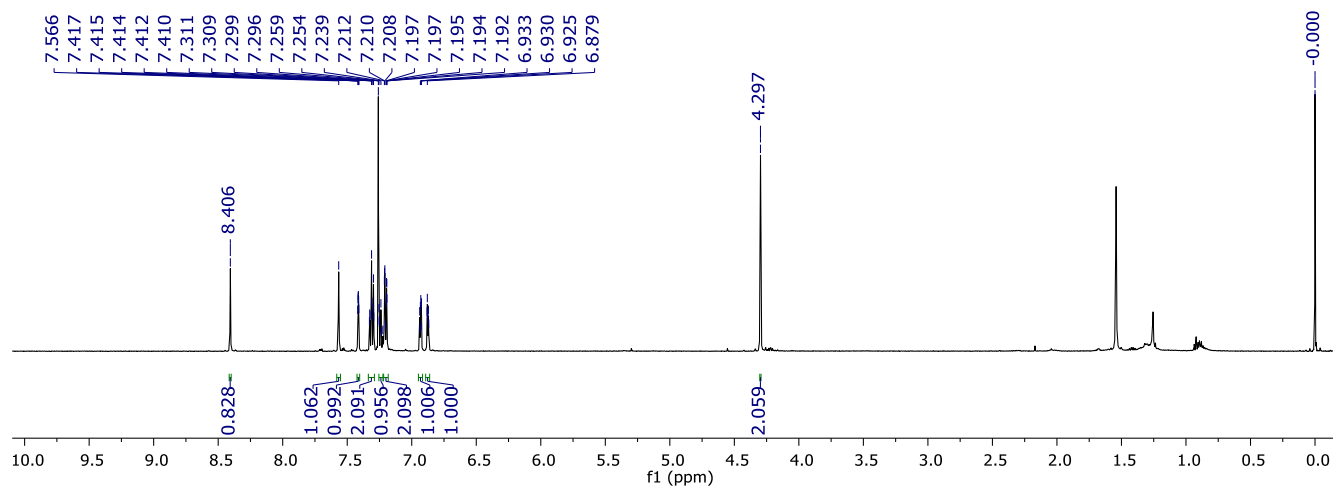

<sup>1</sup>H NMR (500 MHz, CDCl<sub>3</sub>) of compound **4b**.

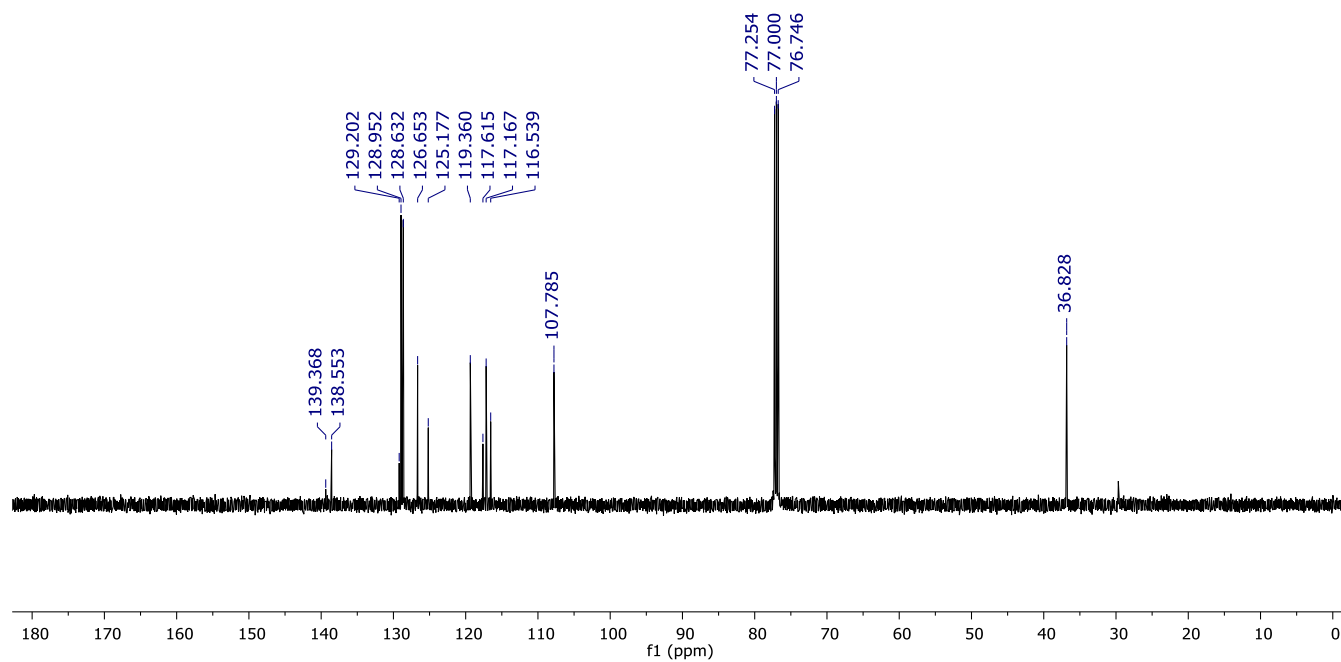

<sup>13</sup>C NMR (125 MHz, CDCl<sub>3</sub>) of compound **4b**.

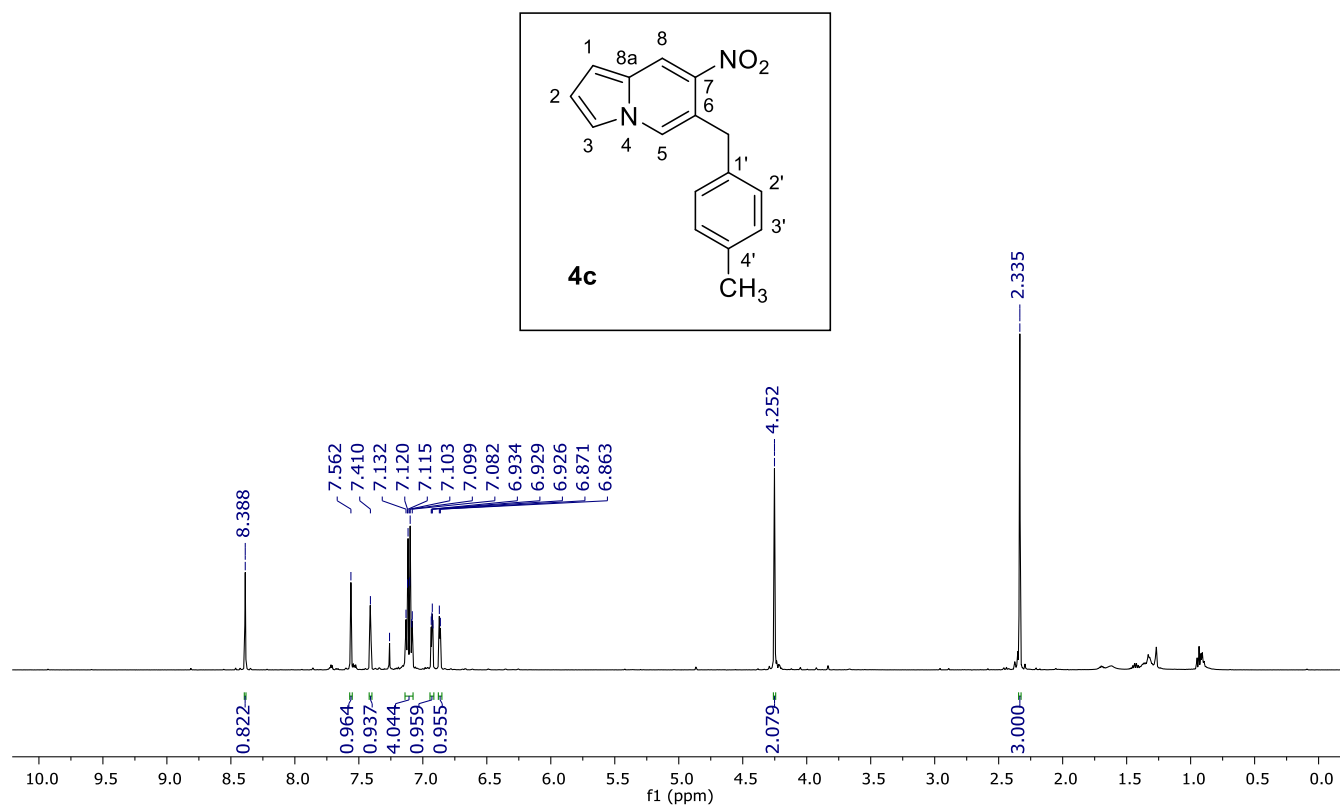

<sup>1</sup>H NMR (500 MHz, CDCl<sub>3</sub>) of compound **4c**.

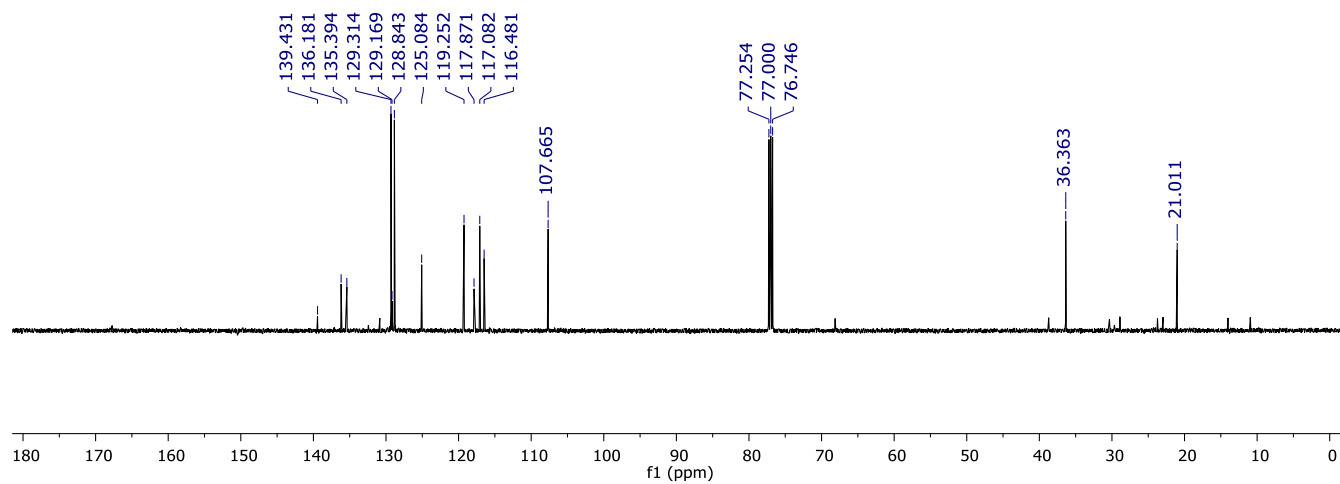

<sup>13</sup>C NMR (125 MHz, CDCl<sub>3</sub>) of compound **4c**.



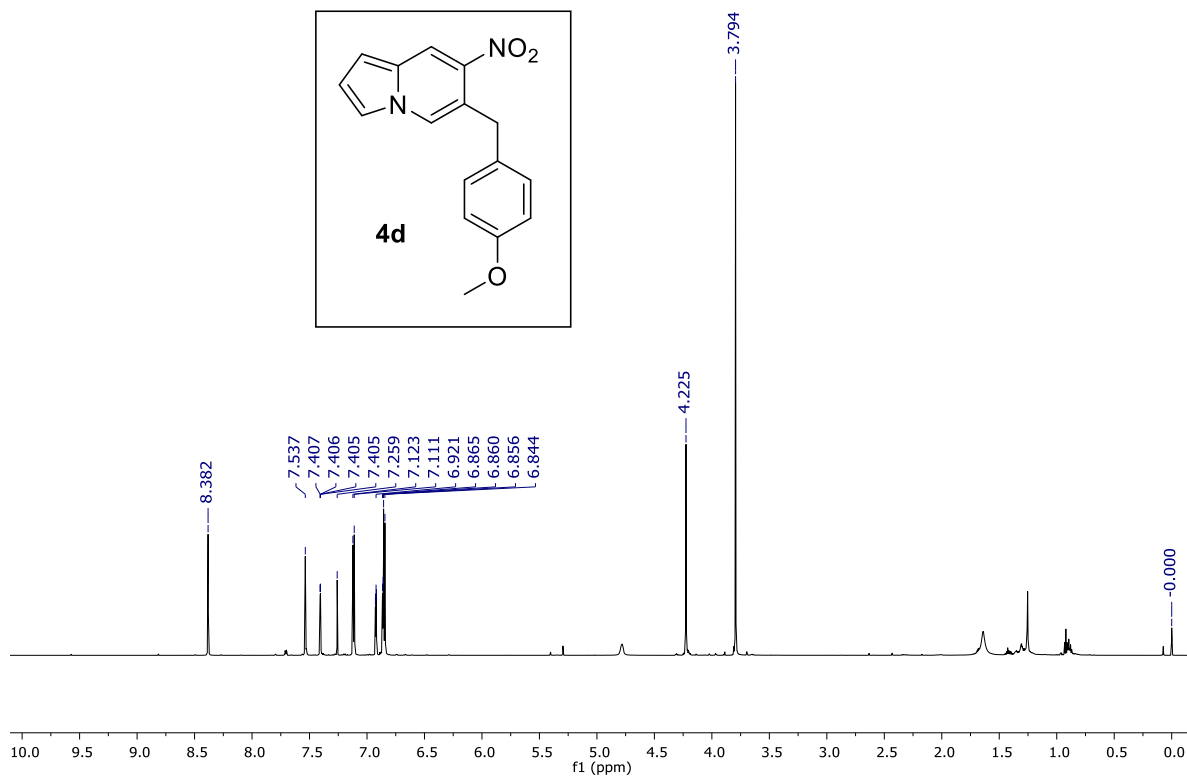

$^1\text{H NMR}$  (750 MHz,  $\text{CDCl}_3$ ) of compound **4d**.

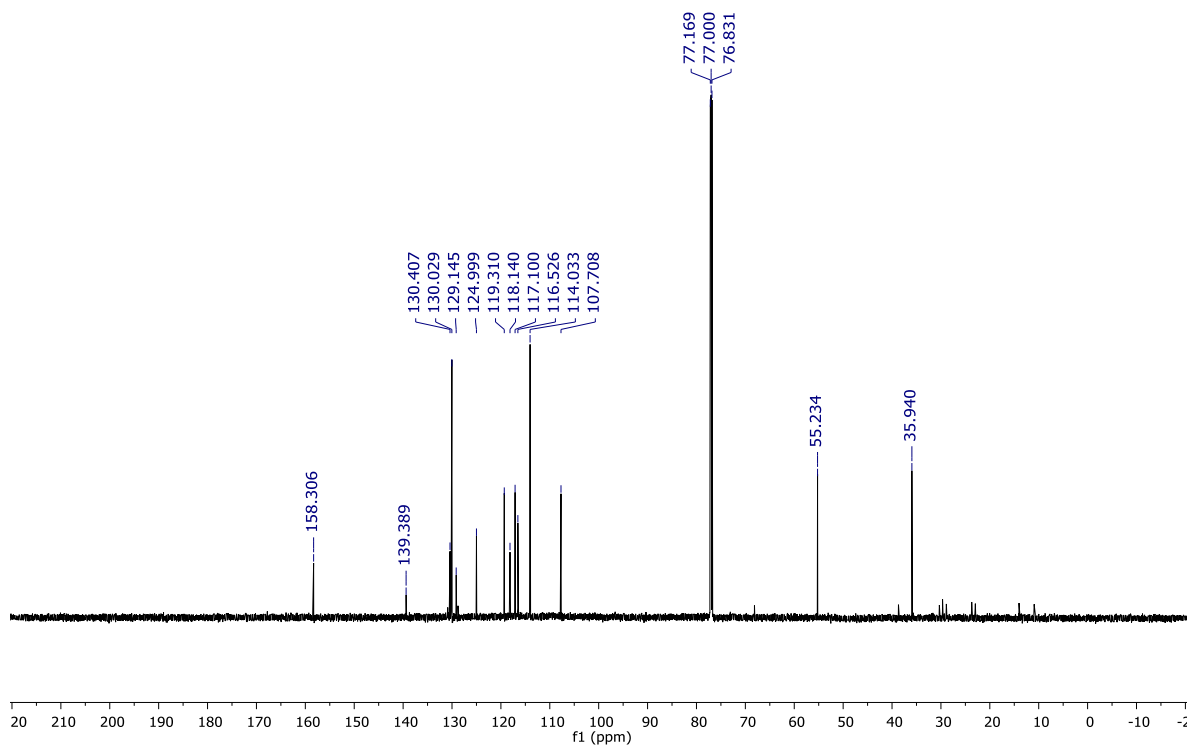

$^{13}\text{C NMR}$  (187.5 MHz,  $\text{CDCl}_3$ ) of compound **4d**.

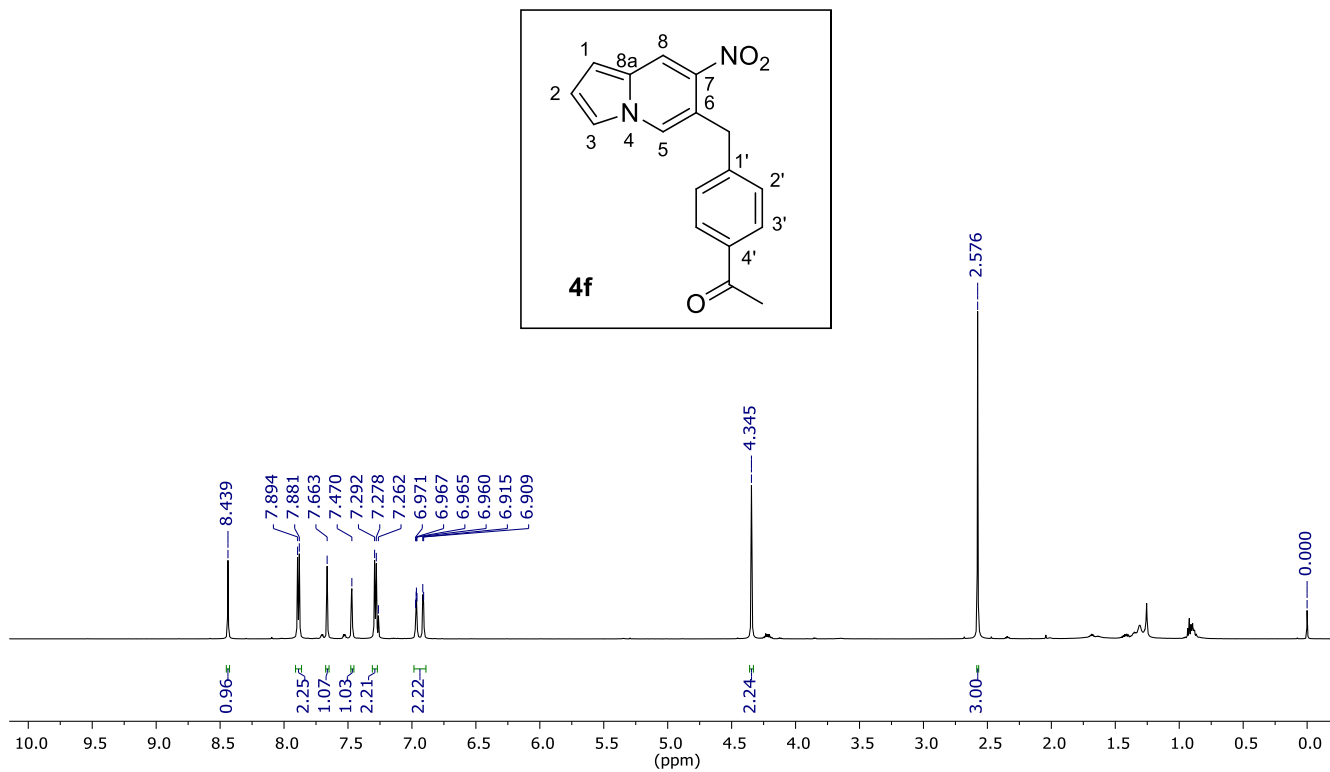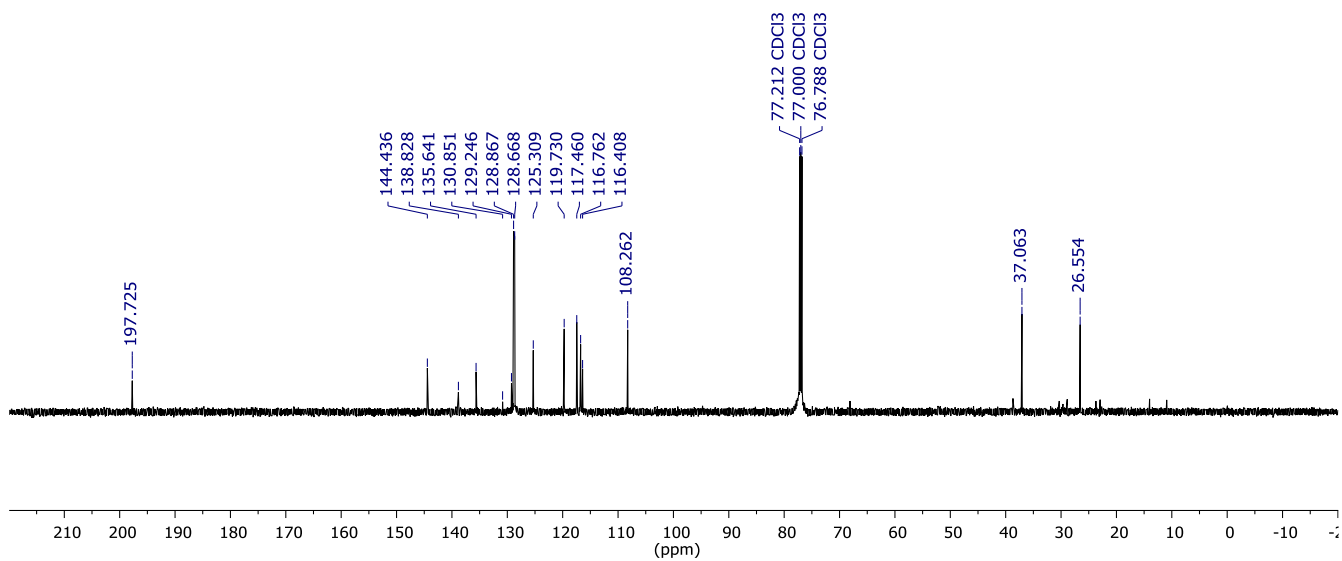

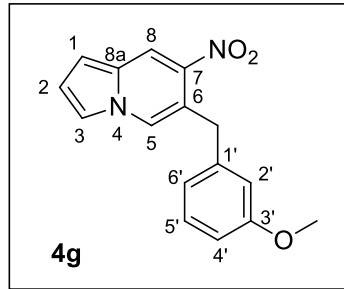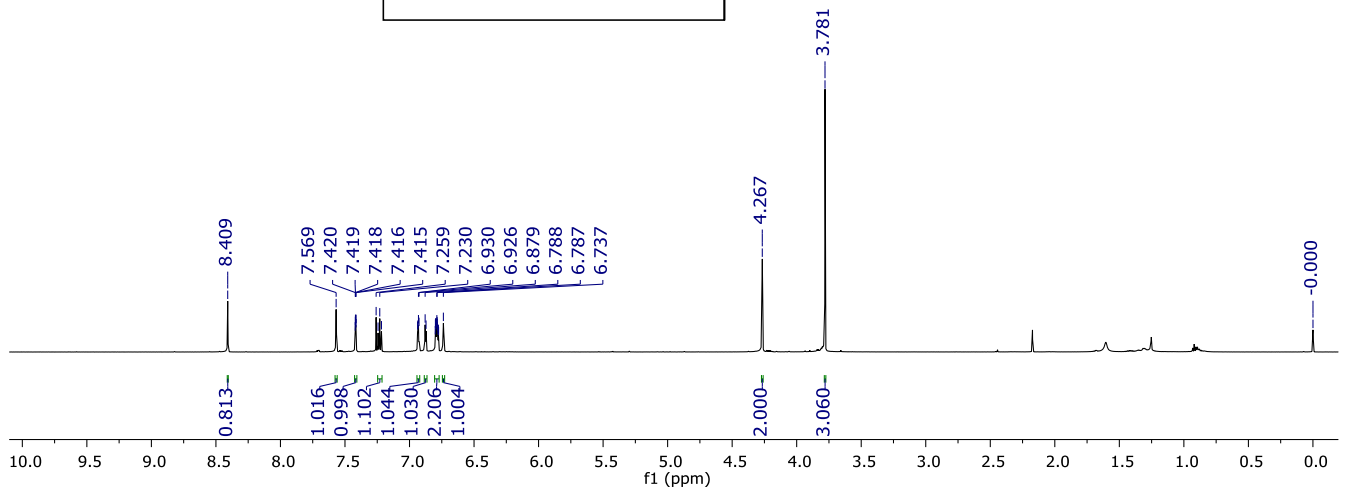

<sup>1</sup>H NMR (600 MHz, CDCl<sub>3</sub>) of compound **4g**.

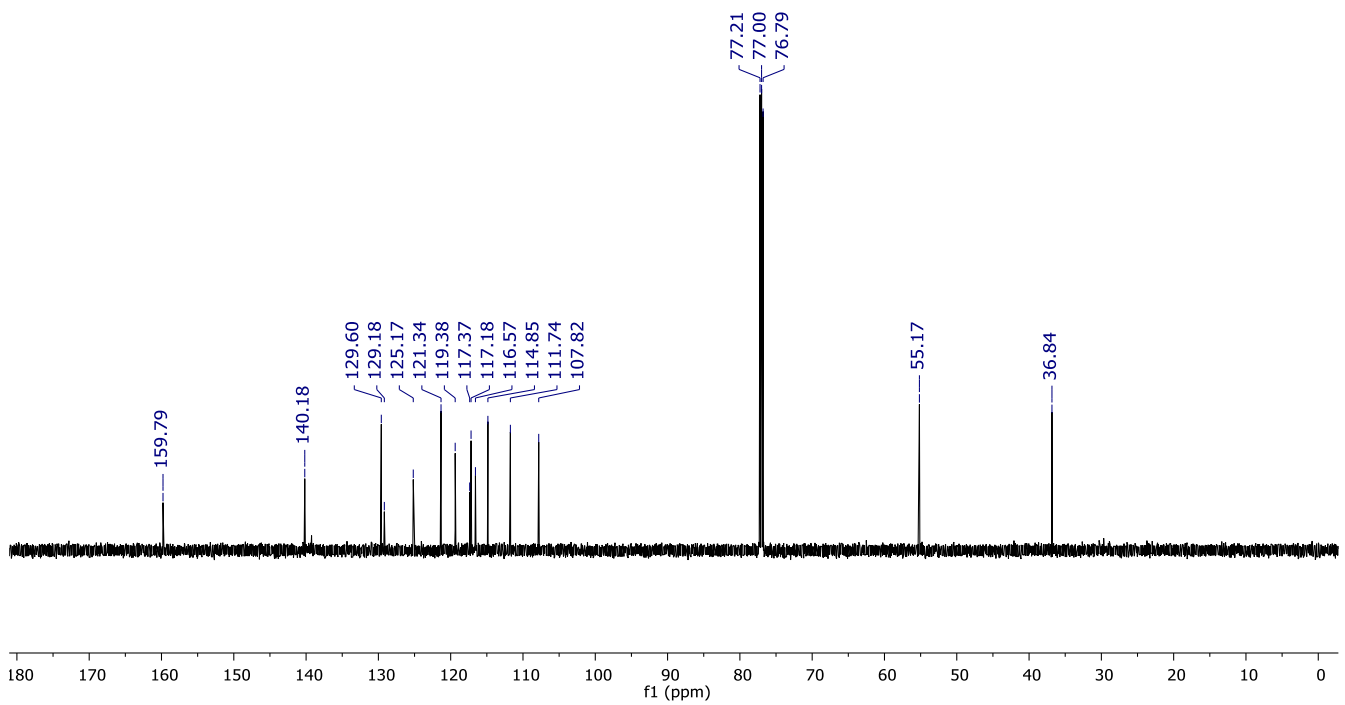

<sup>13</sup>C NMR (150 MHz, CDCl<sub>3</sub>) of compound **4g**.

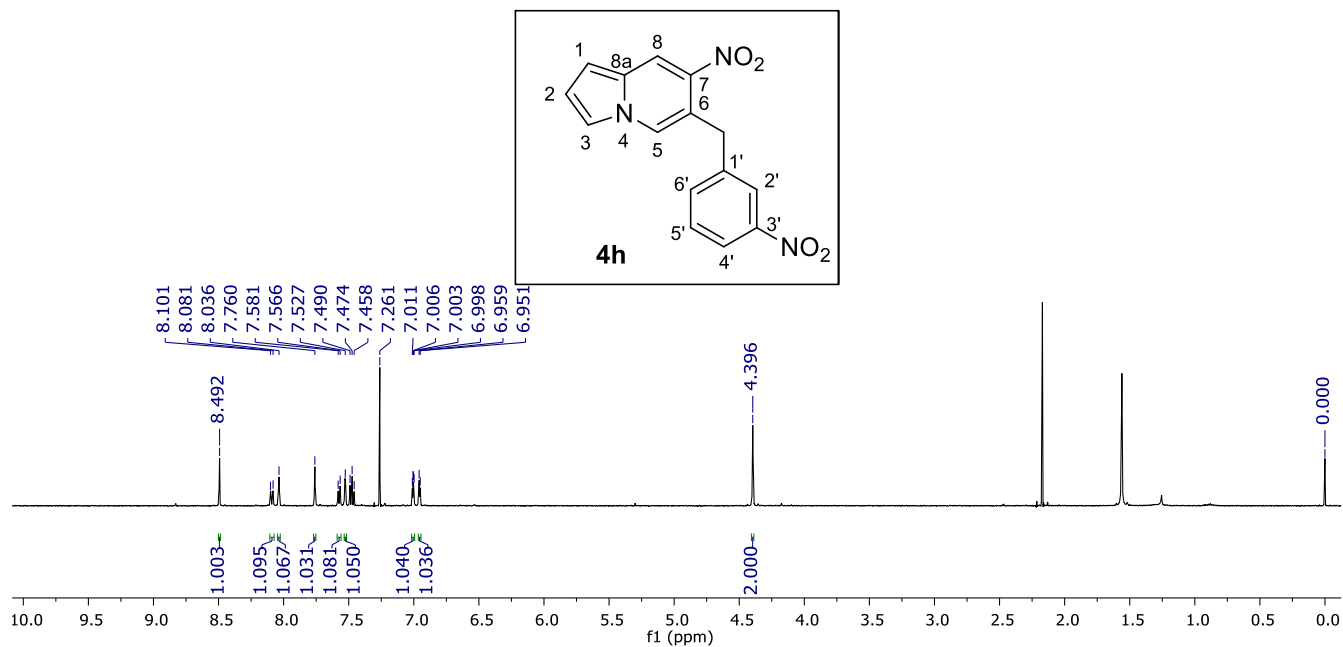

<sup>1</sup>H NMR (500 MHz, CDCl<sub>3</sub>) of compound **4h**.

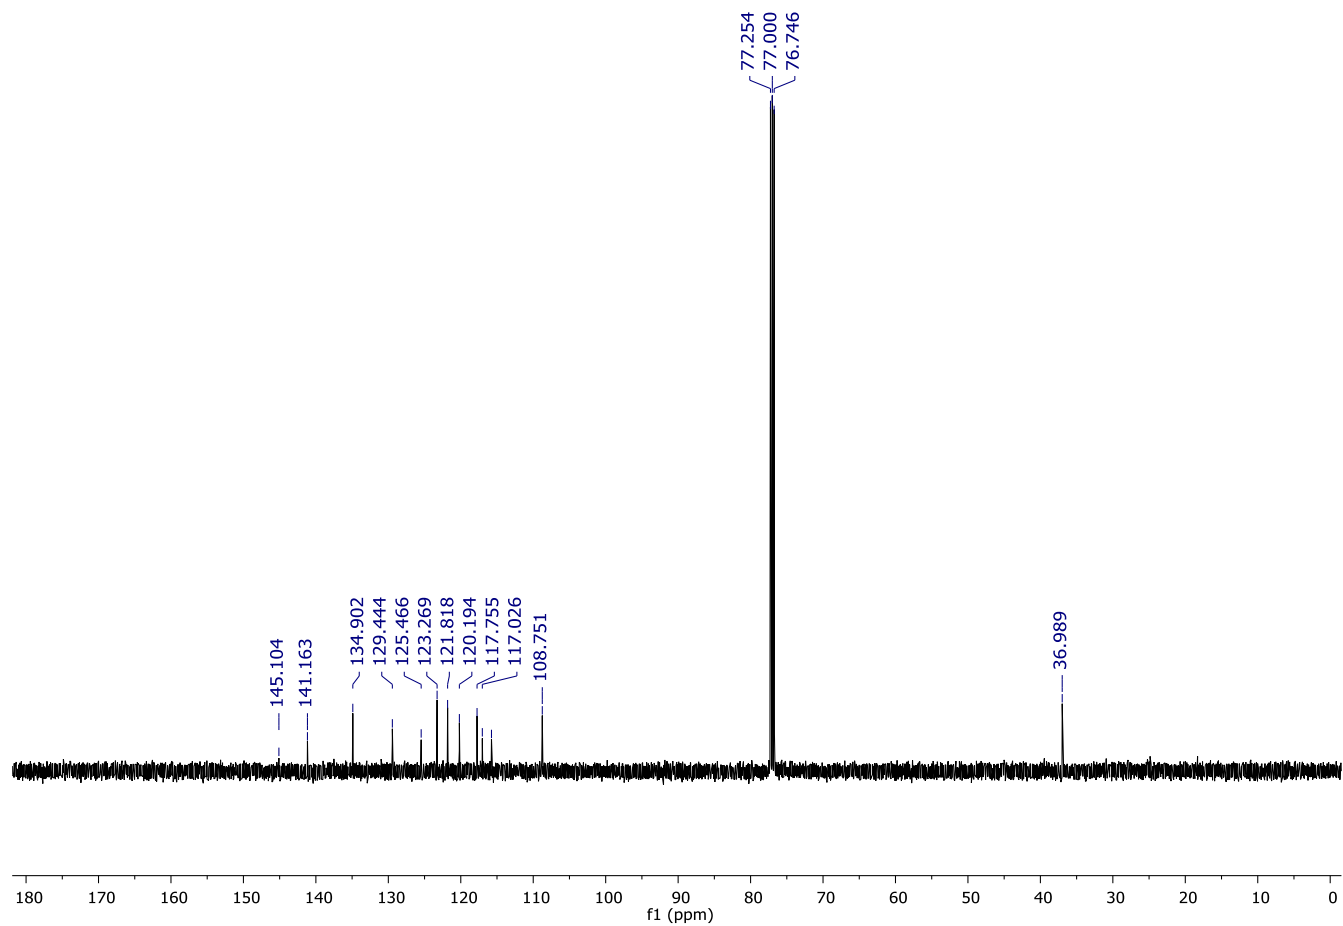

<sup>13</sup>C NMR (125 MHz, CDCl<sub>3</sub>) of compound **4h**.

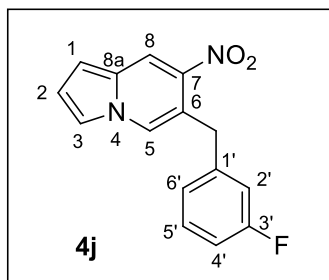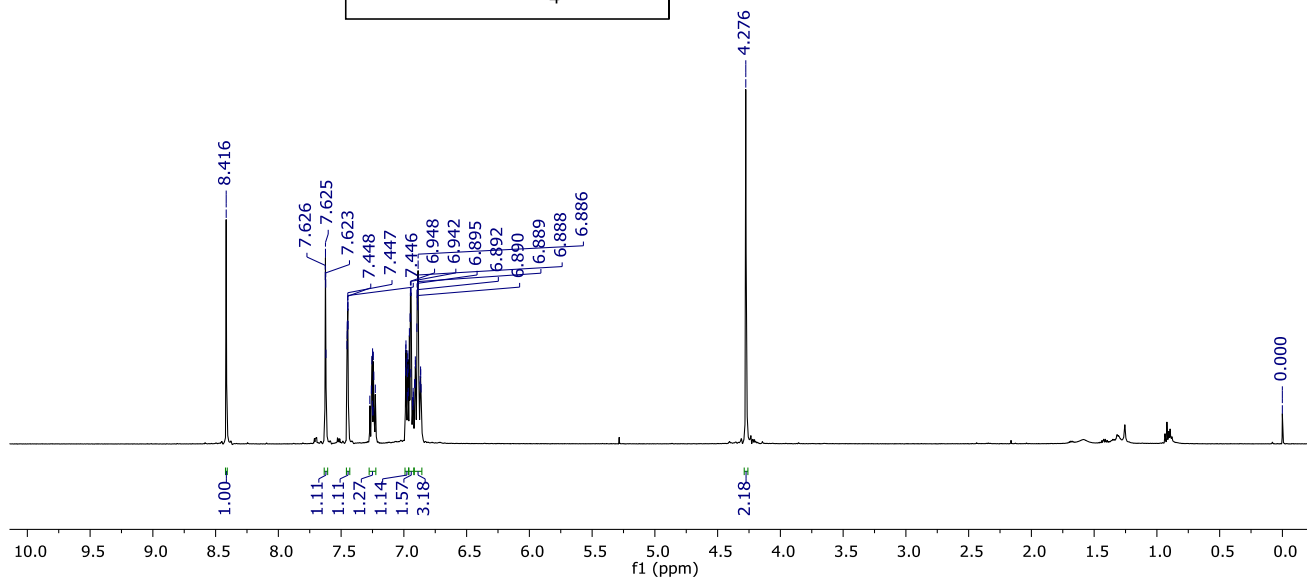

<sup>1</sup>H NMR (500 MHz, CDCl<sub>3</sub>) of compound **4j**.

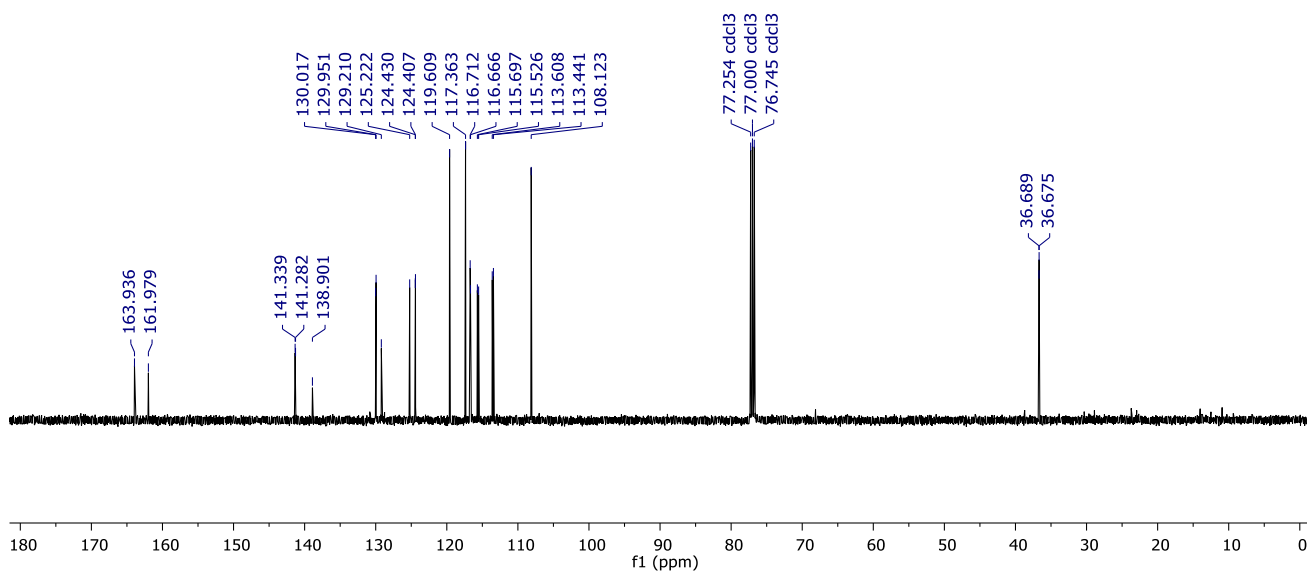

<sup>13</sup>C NMR (125 MHz, CDCl<sub>3</sub>) of compound **4j**.

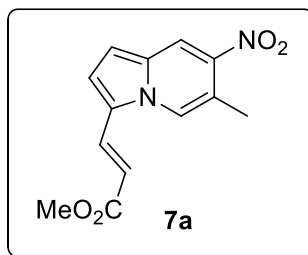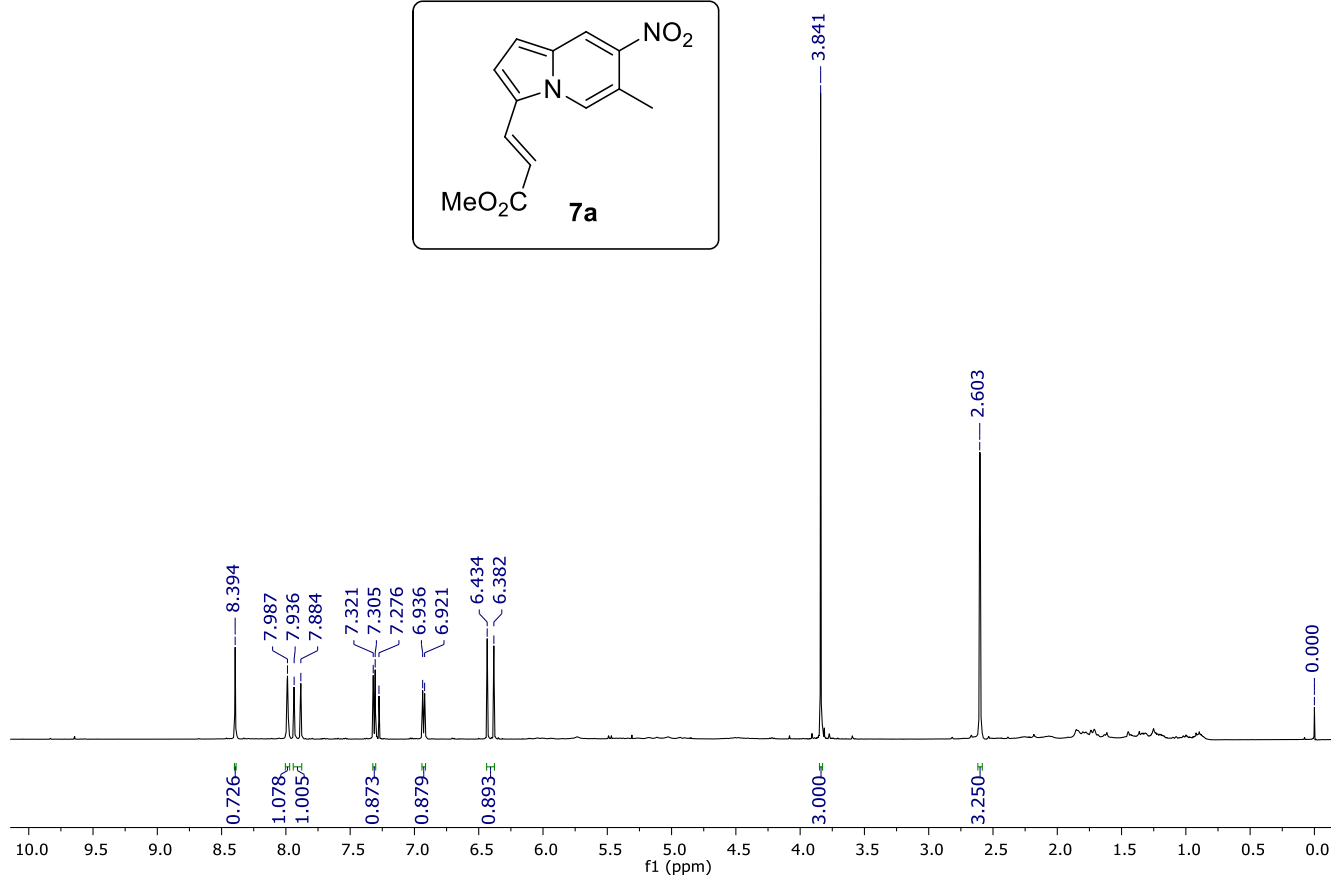

<sup>1</sup>H NMR (300 MHz, CDCl<sub>3</sub>) of compound **7a**.

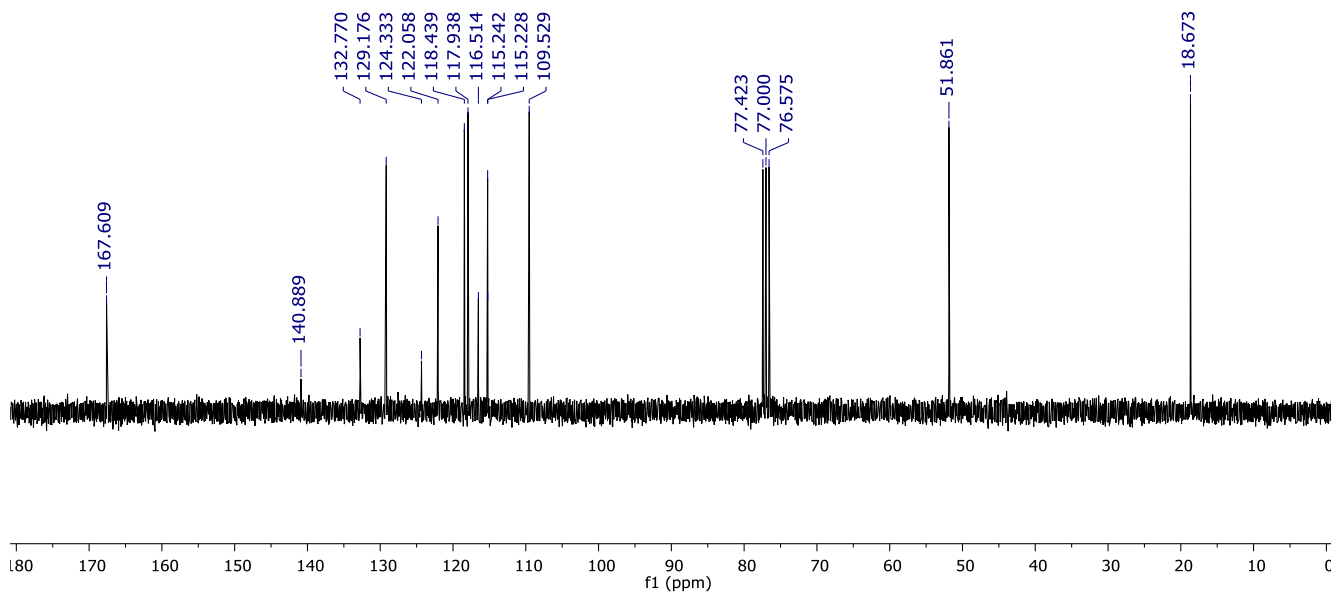

<sup>13</sup>C NMR (75.4 MHz, CDCl<sub>3</sub>) of compound **7a**.

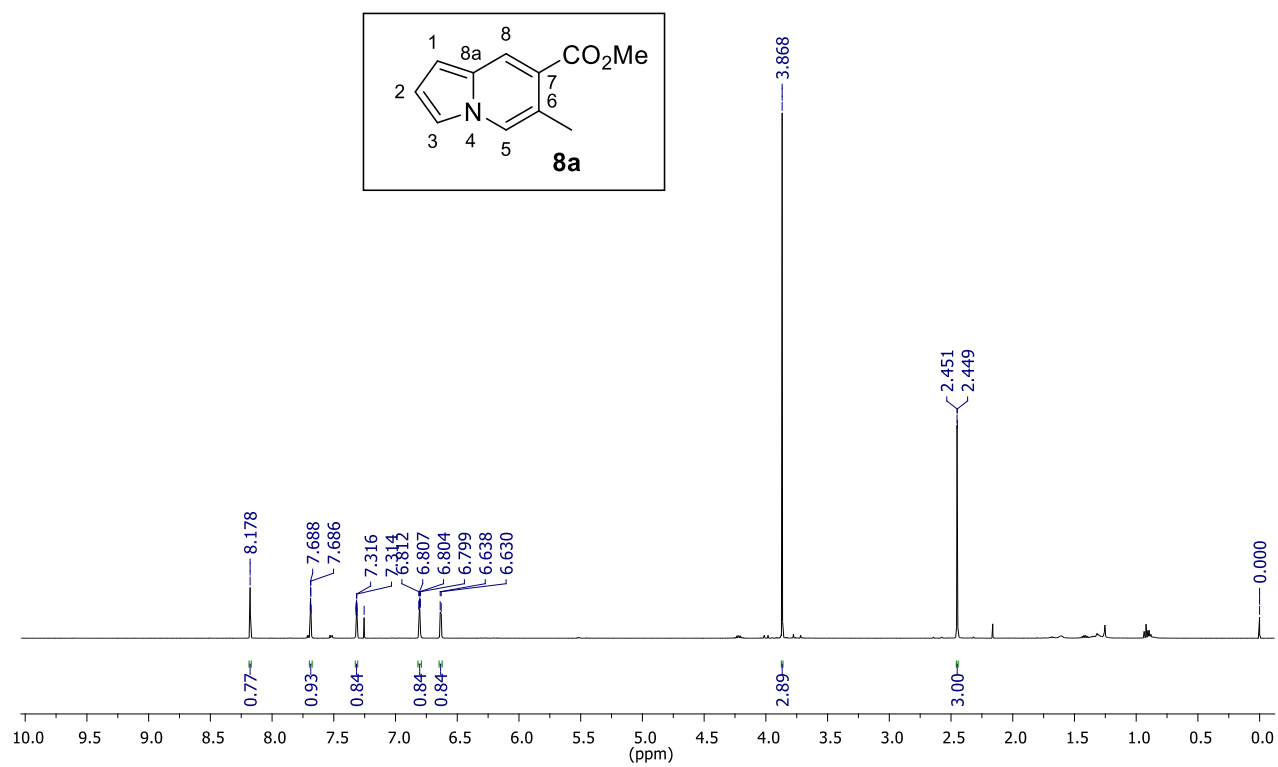

<sup>1</sup>H NMR (500 MHz, CDCl<sub>3</sub>) of compound **8a**.

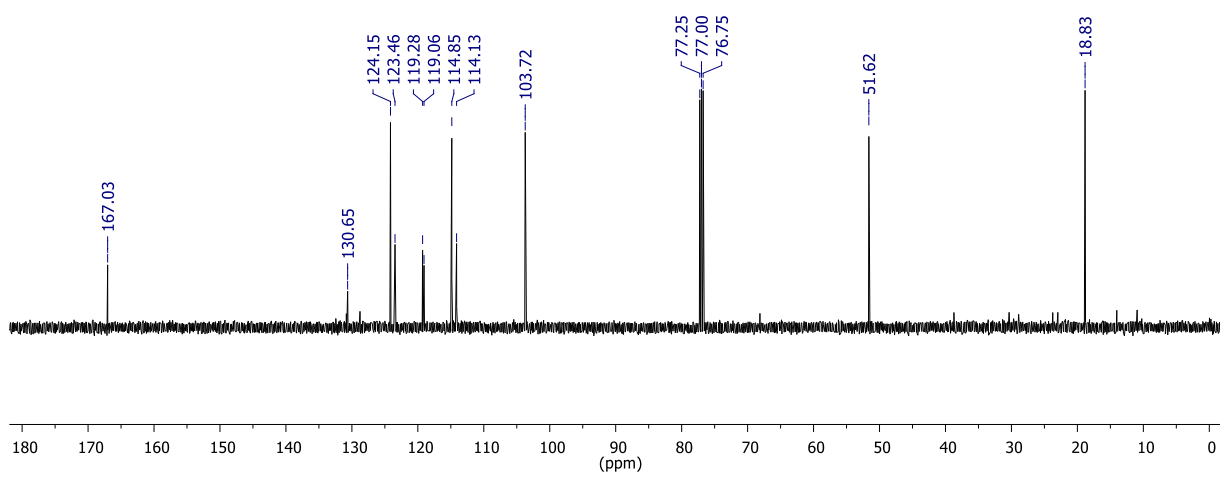

<sup>13</sup>C NMR (125 MHz, CDCl<sub>3</sub>) of compound **8a**.

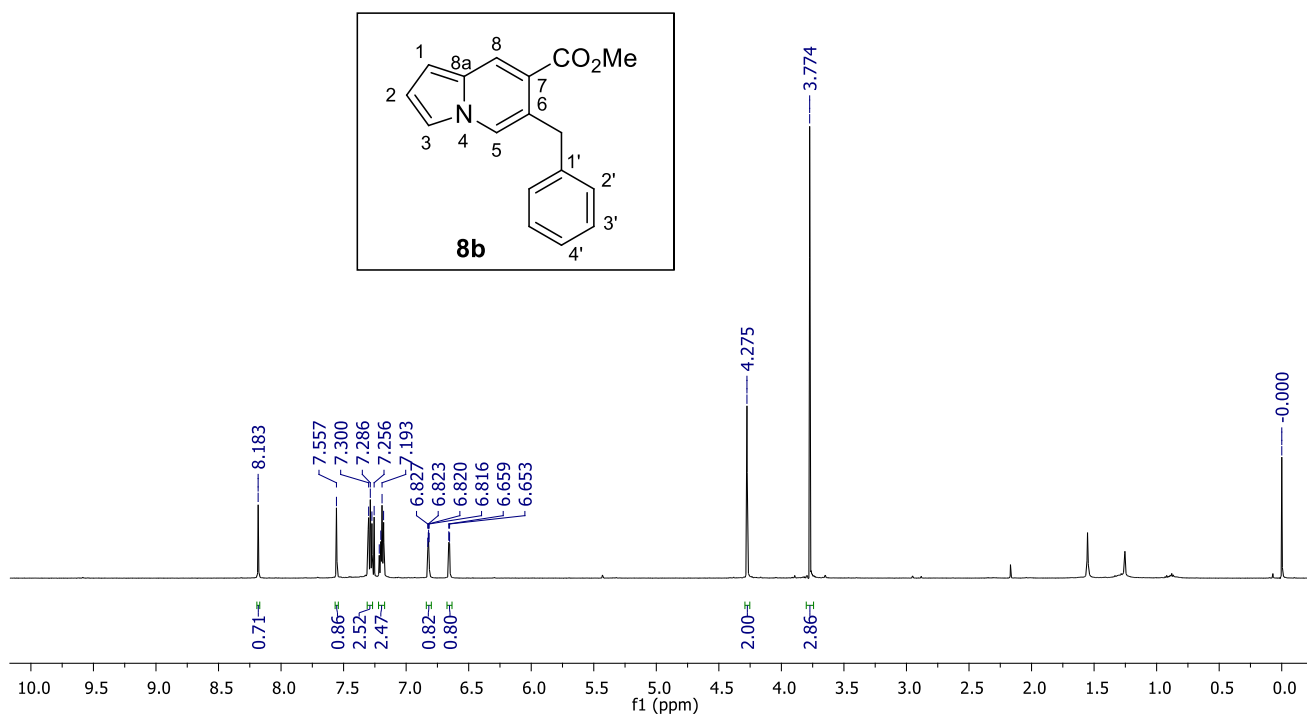

<sup>1</sup>H NMR (600 MHz, CDCl<sub>3</sub>) of compound **8b**.

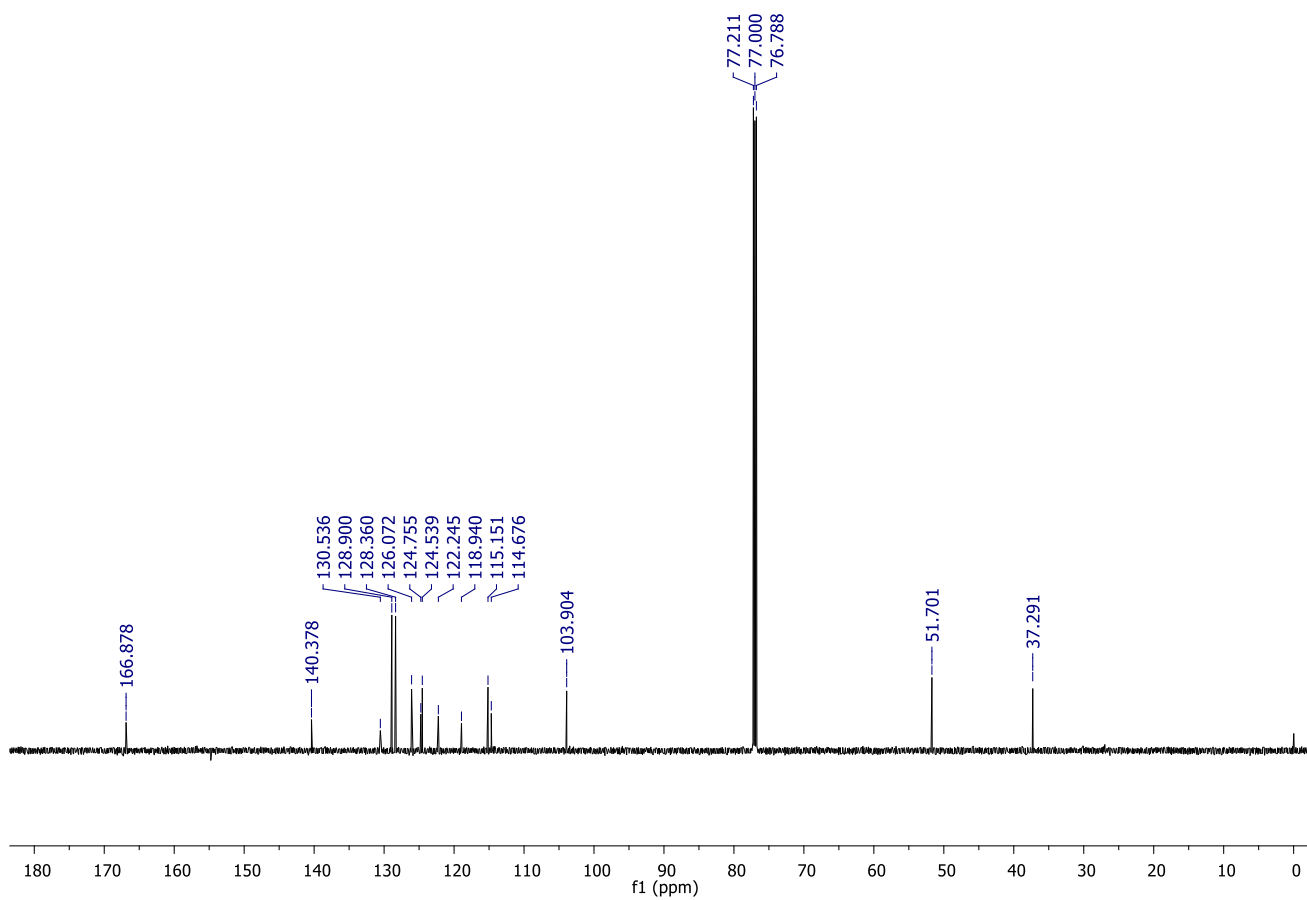

<sup>13</sup>C NMR (150 MHz, CDCl<sub>3</sub>) of compound **8b**.



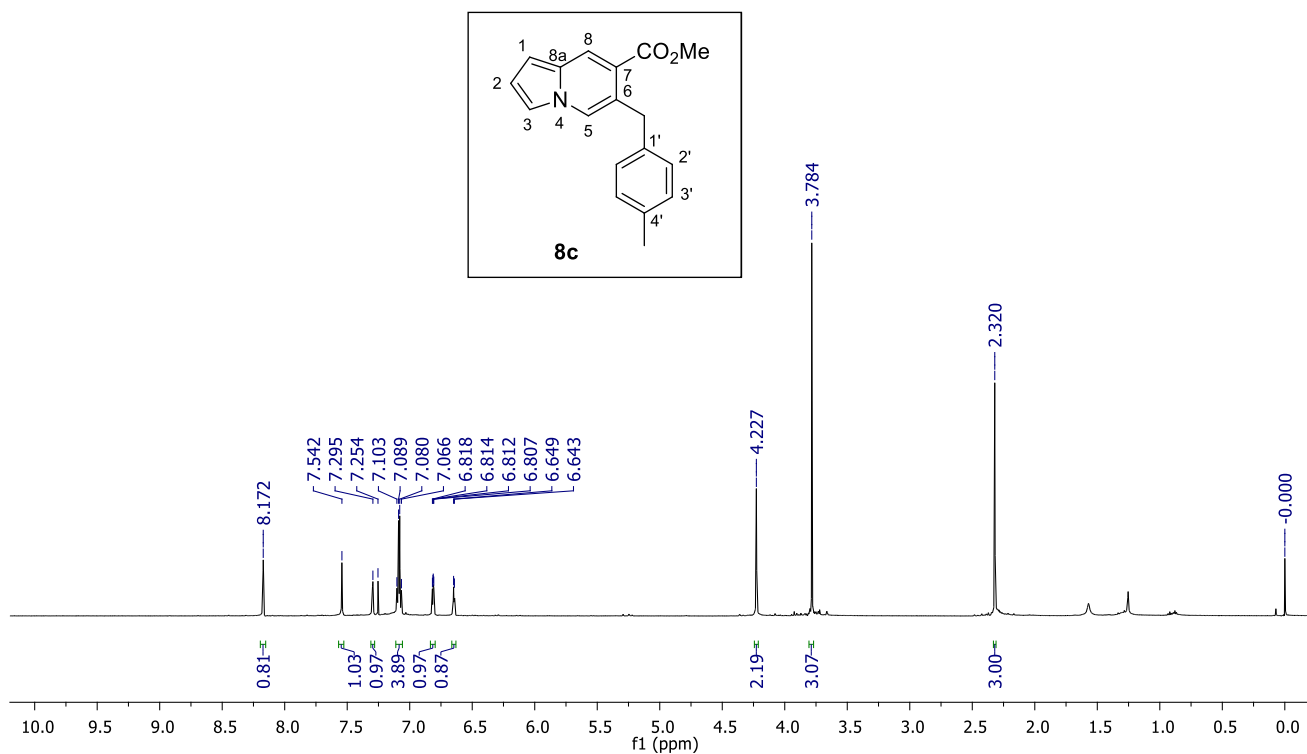

<sup>1</sup>H NMR (600 MHz, CDCl<sub>3</sub>) of compound **8c**.

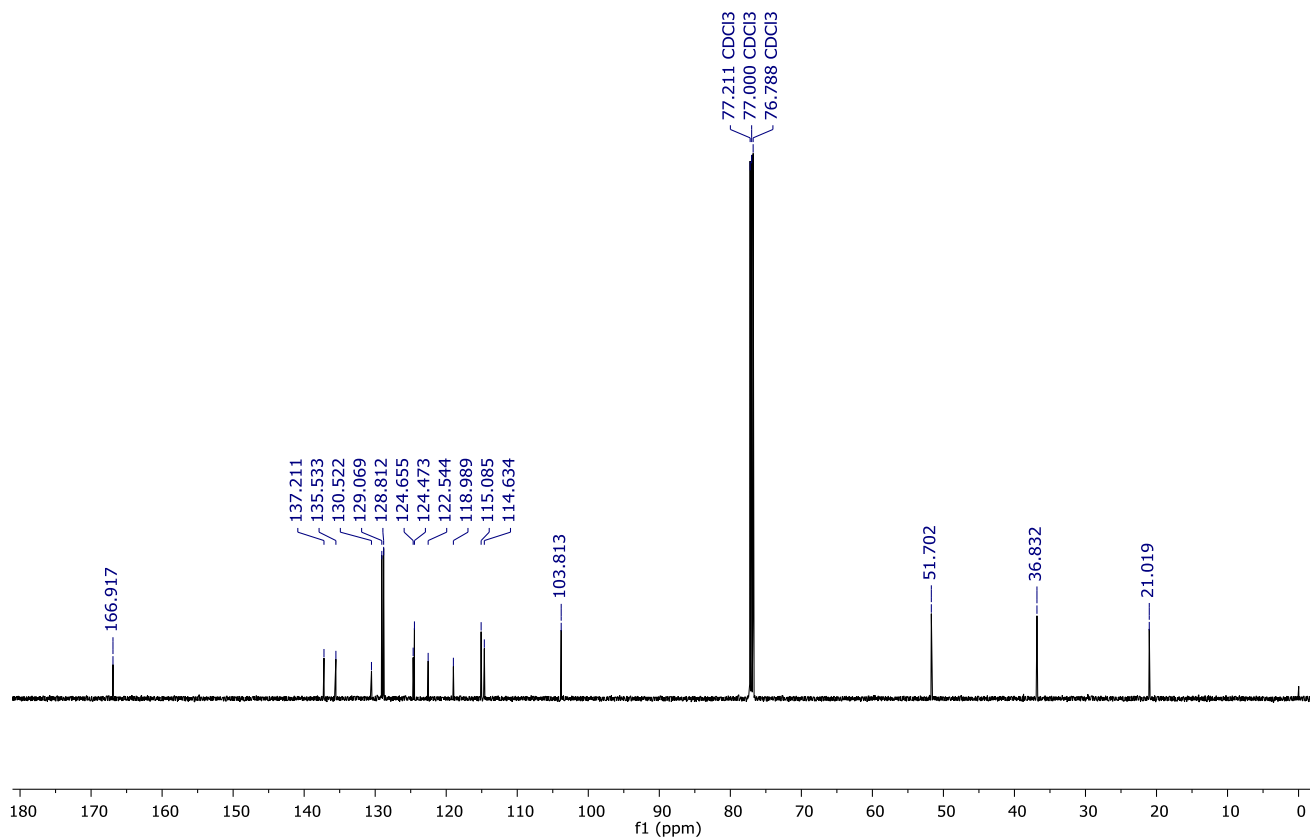

<sup>13</sup>C NMR (150 MHz, CDCl<sub>3</sub>) of compound **8c**.

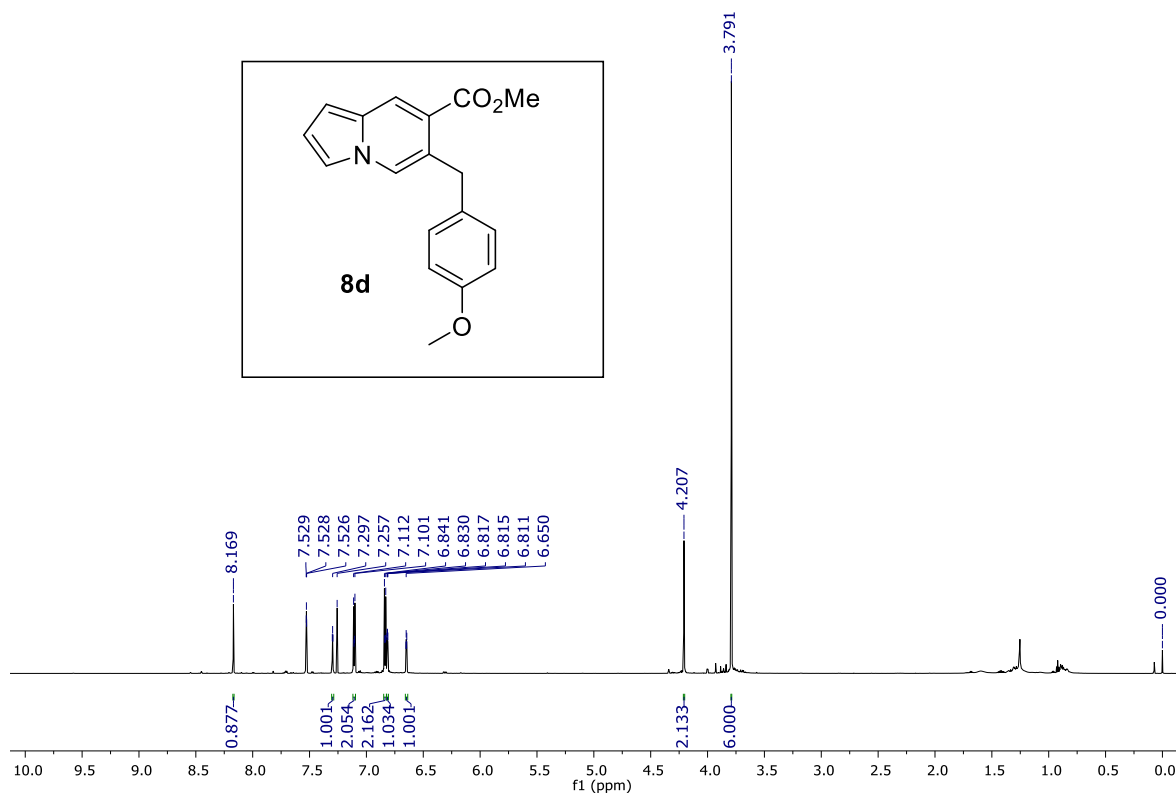

<sup>1</sup>H NMR (750 MHz, CDCl<sub>3</sub>) of compound **8d**.

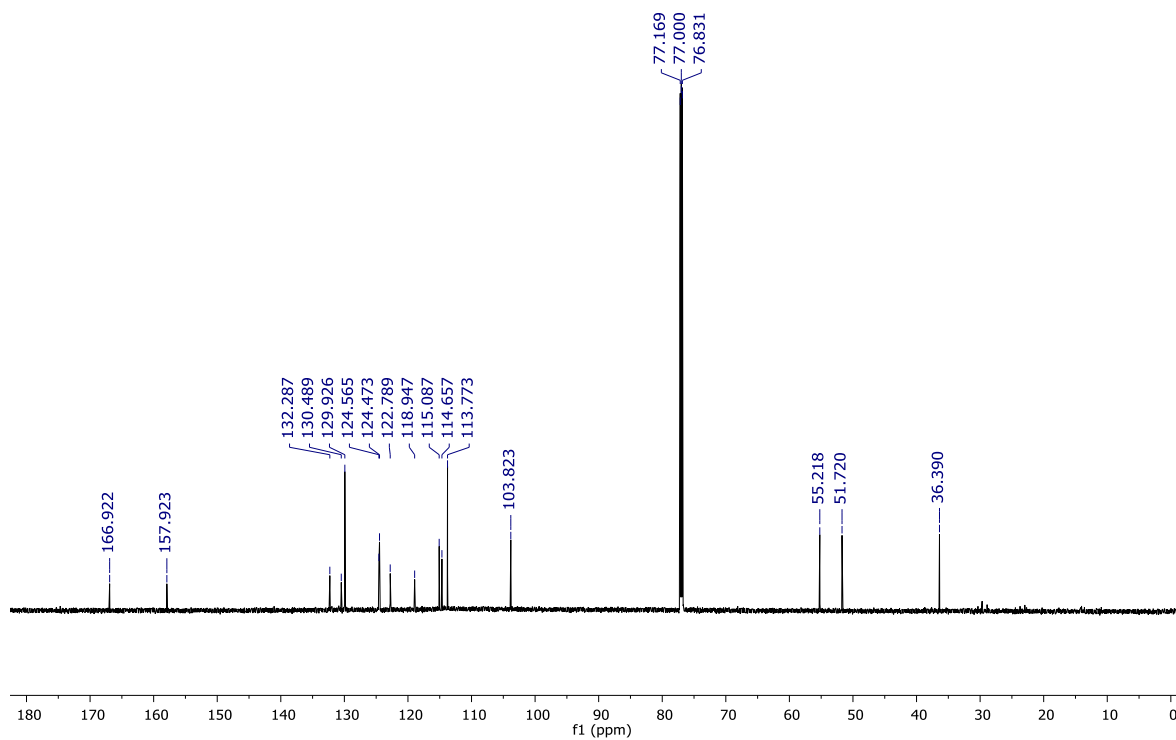

<sup>13</sup>C NMR (187.5 MHz, CDCl<sub>3</sub>) of compound **8d**.

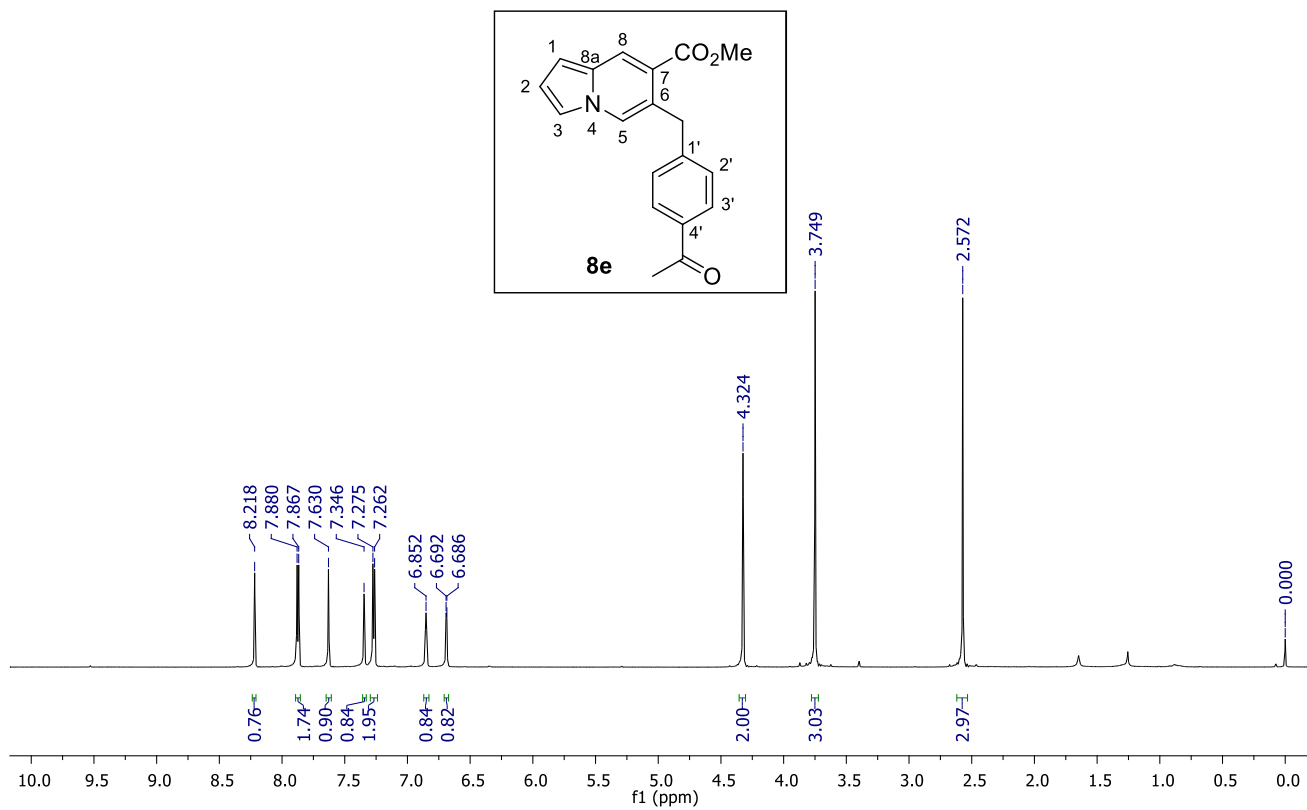

<sup>1</sup>H NMR (600 MHz, CDCl<sub>3</sub>) of compound **8e**.

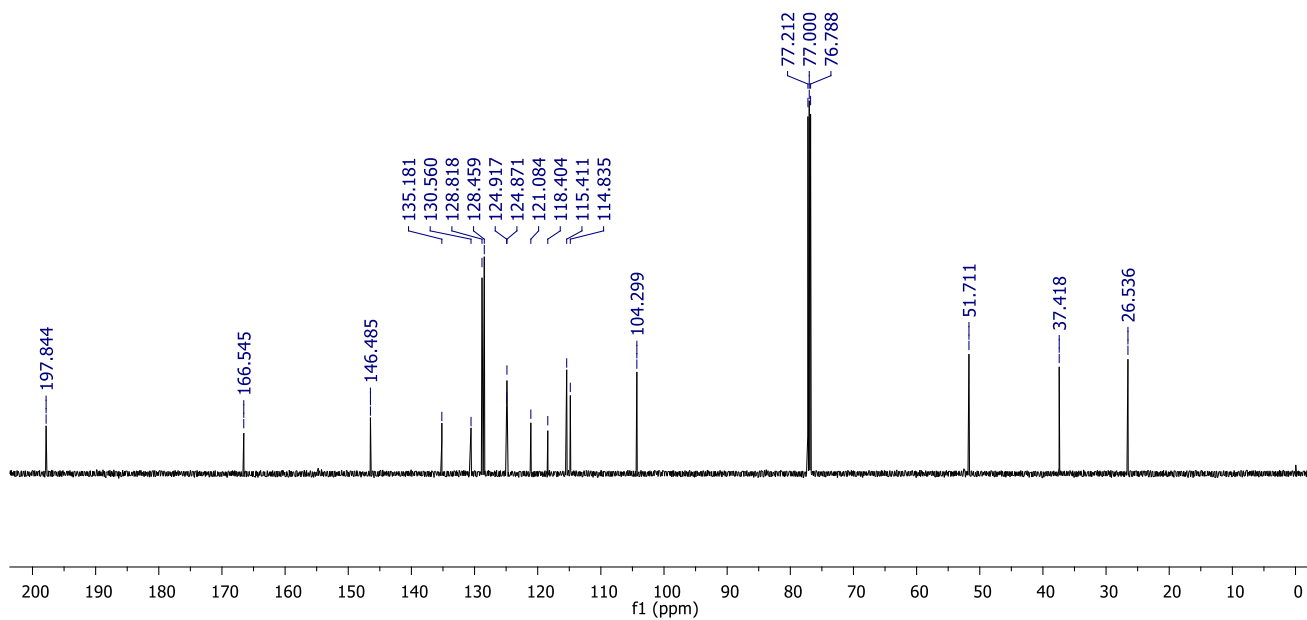

<sup>13</sup>C NMR (150 MHz, CDCl<sub>3</sub>) of compound **8e**.

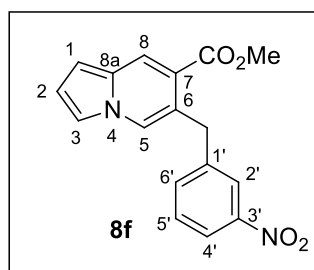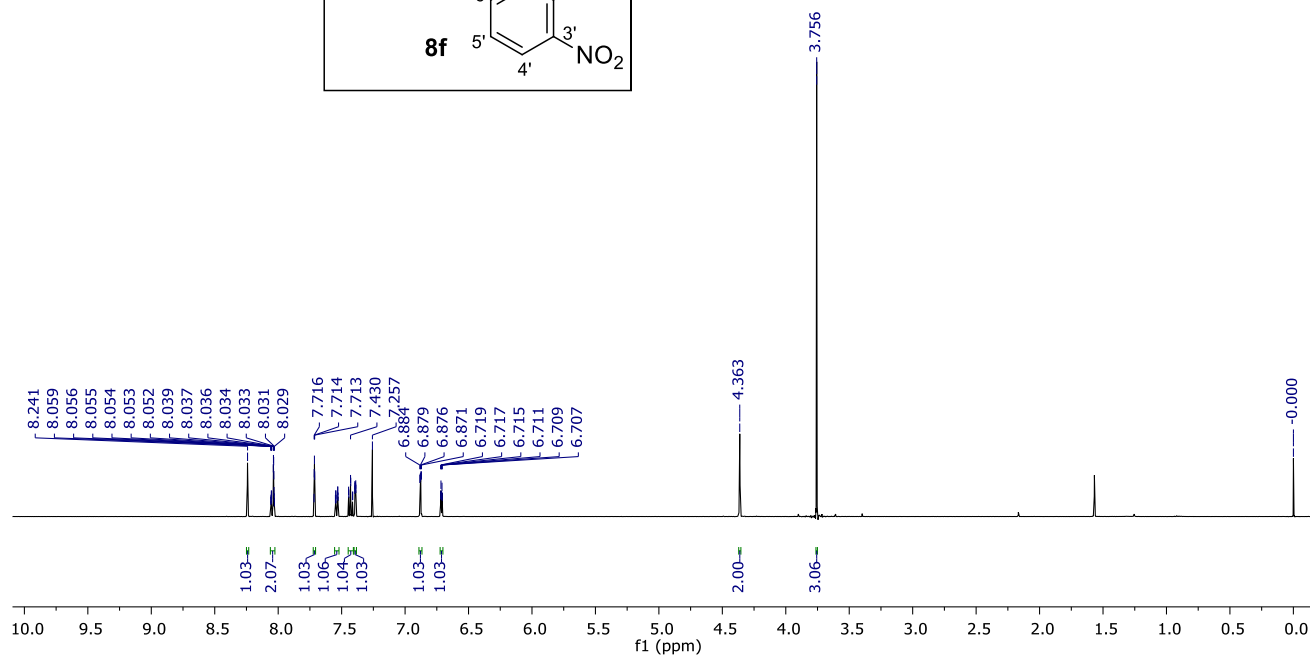

<sup>1</sup>H NMR (500 MHz, CDCl<sub>3</sub>) of compound **8f**.

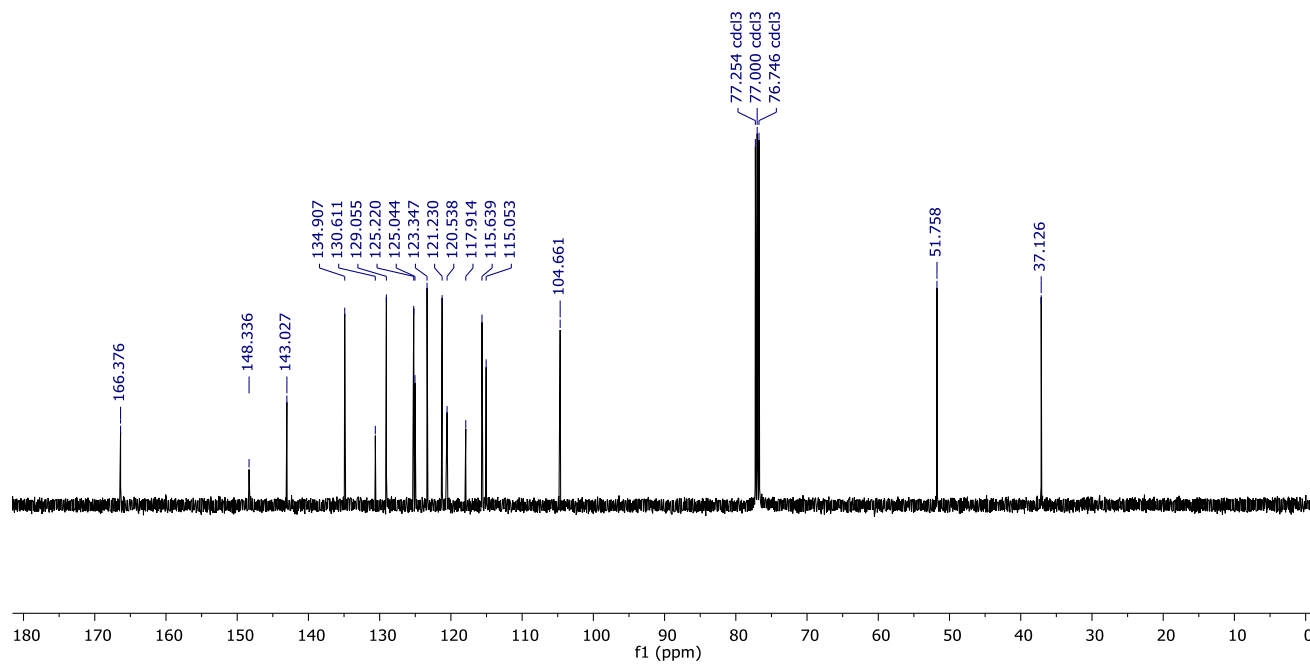

<sup>13</sup>C NMR (125 MHz, CDCl<sub>3</sub>) of compound **8f**.

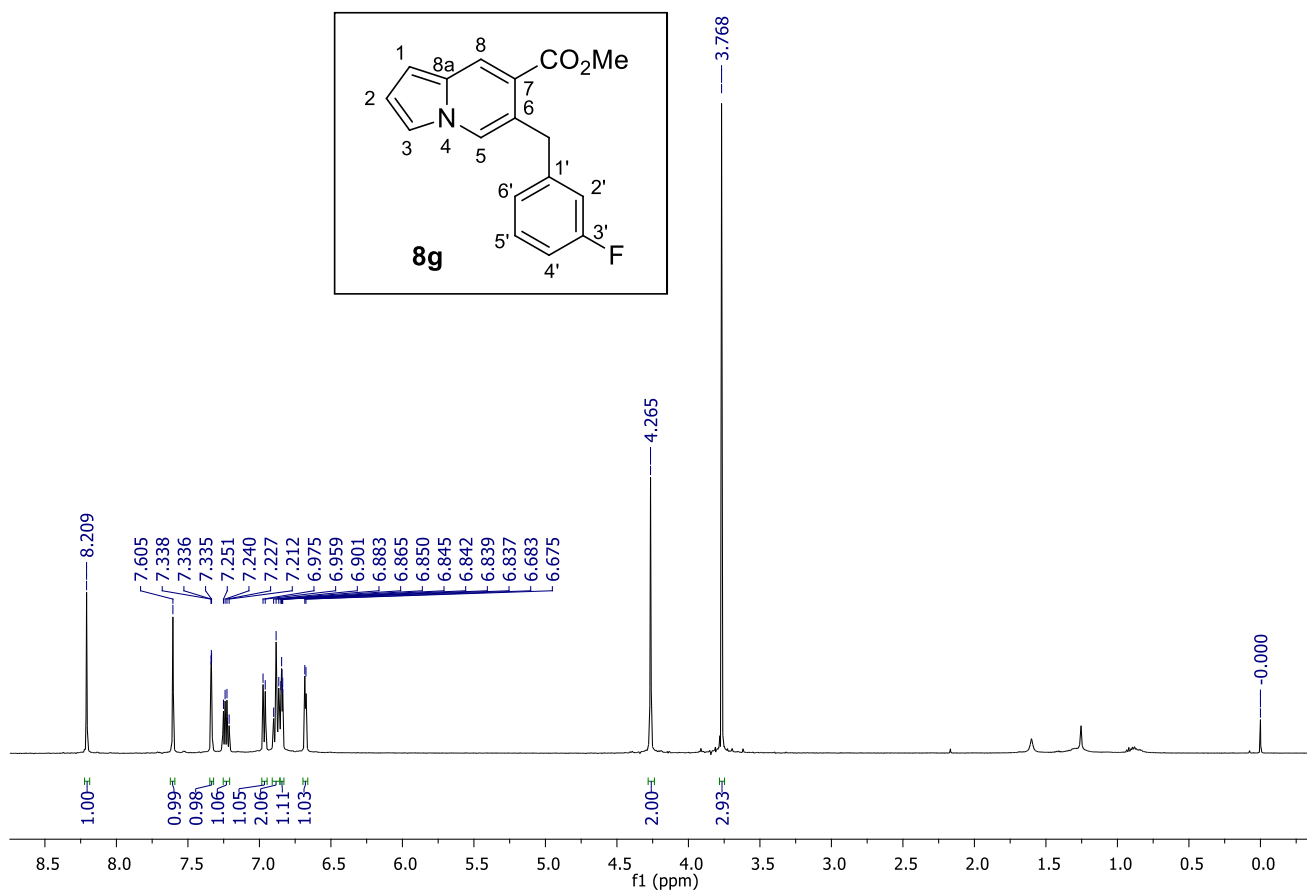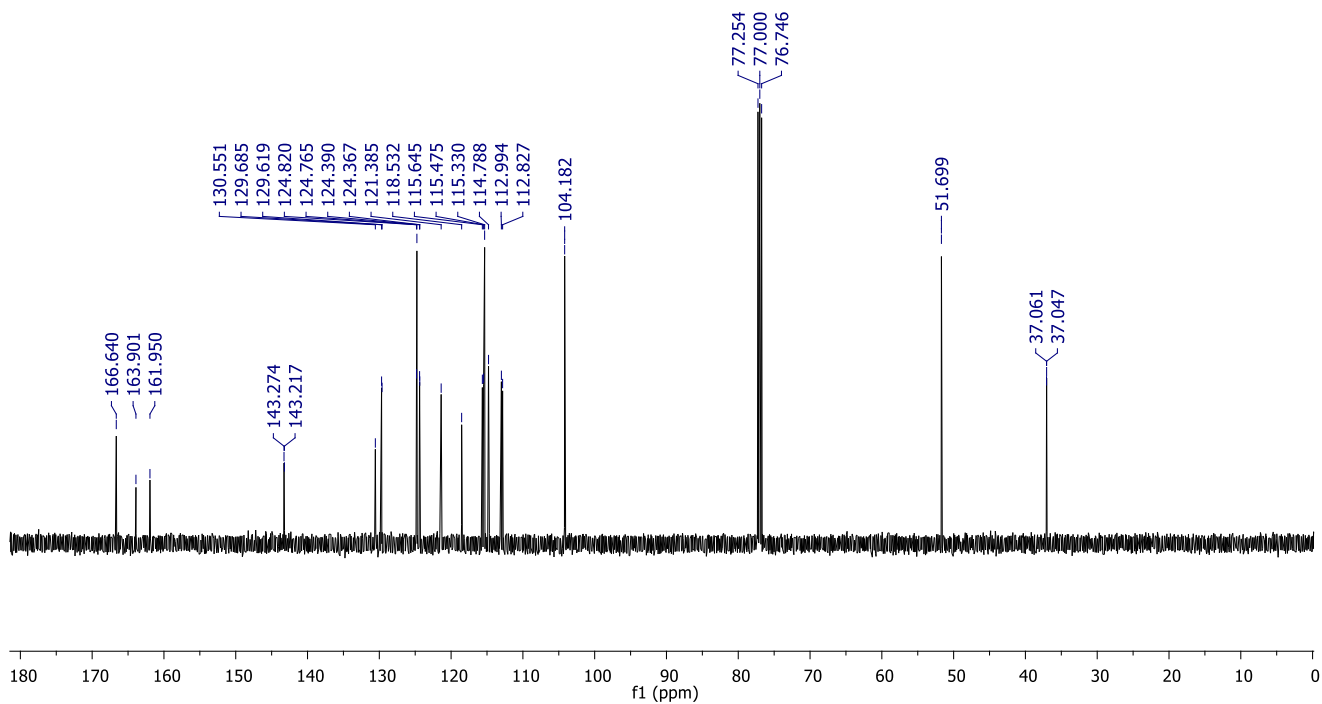

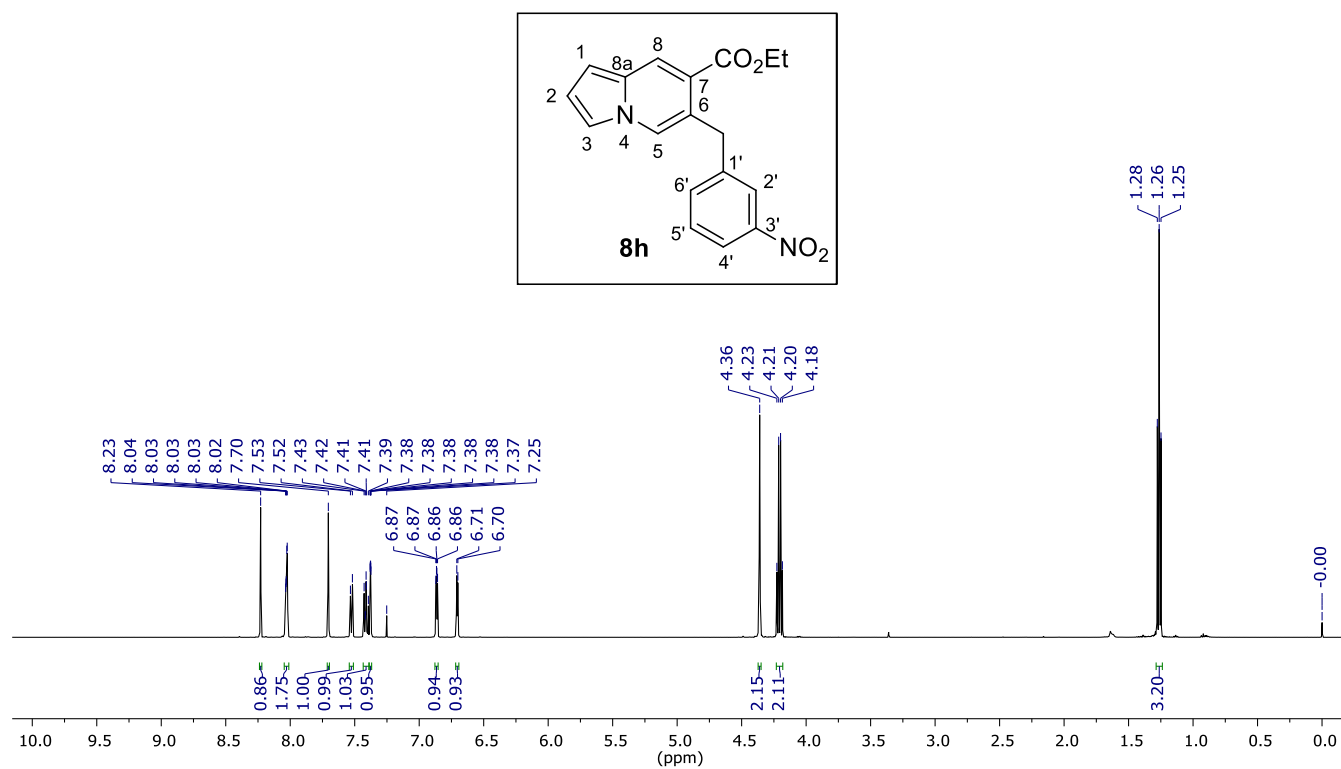

<sup>1</sup>H NMR (500 MHz, CDCl<sub>3</sub>) of compound **8h**.

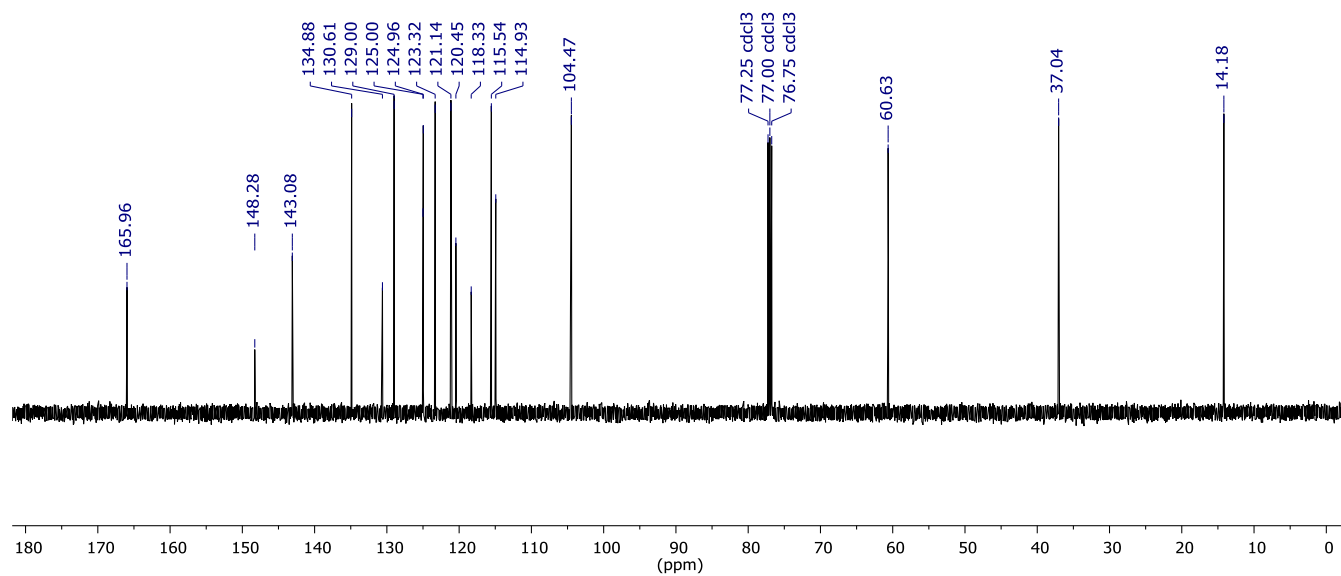

<sup>13</sup>C NMR (125 MHz, CDCl<sub>3</sub>) of compound **8h**.

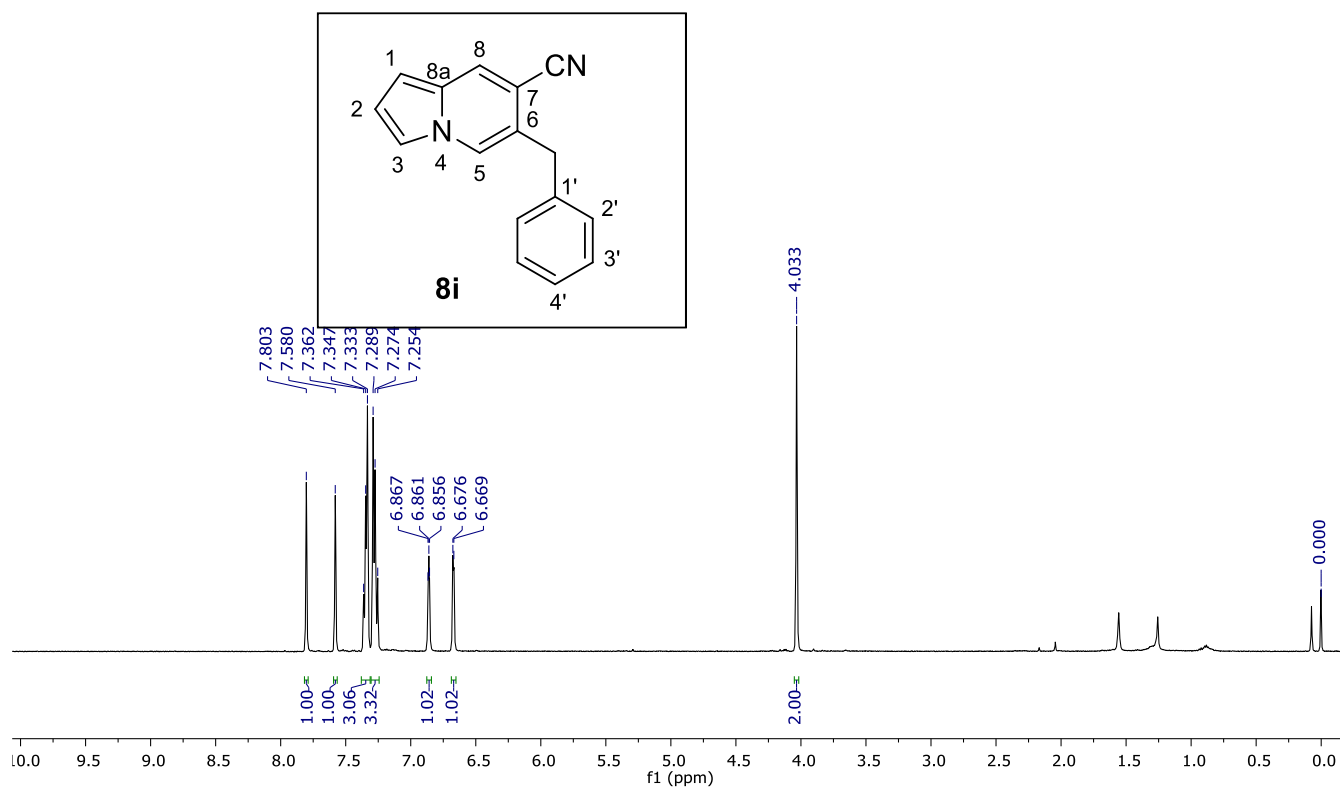

<sup>1</sup>H NMR (500 MHz, CDCl<sub>3</sub>) of compound **8i**.

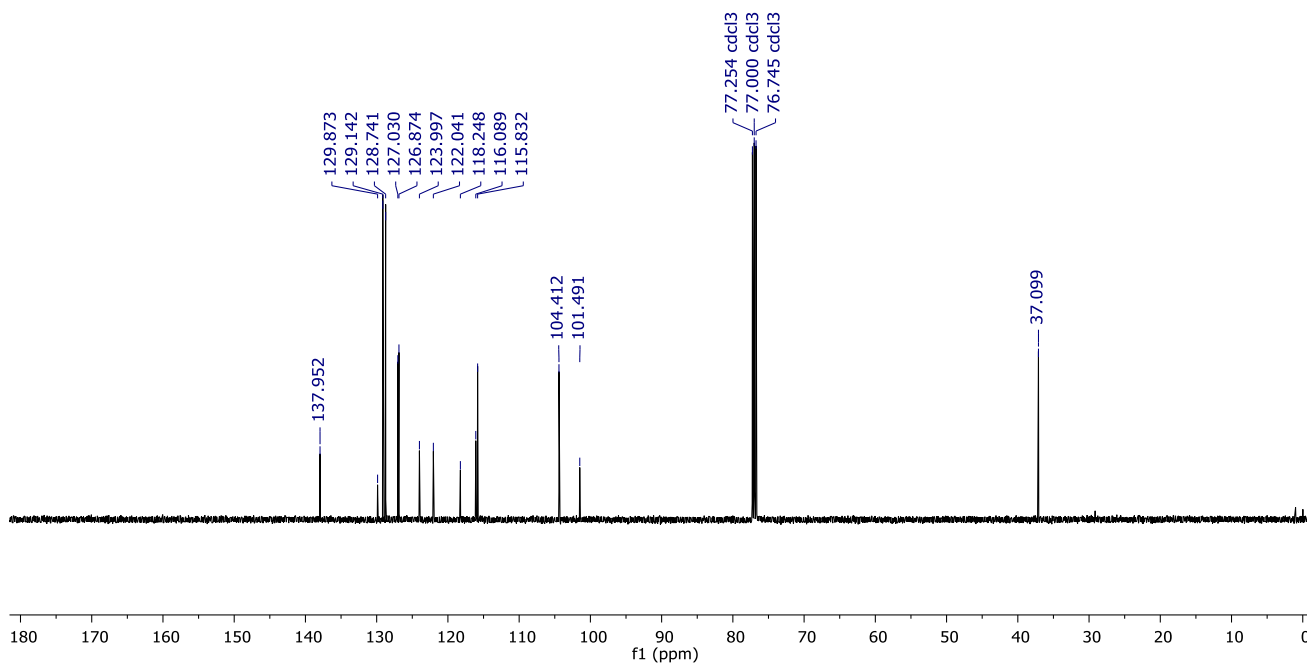

<sup>13</sup>C NMR (125 MHz, CDCl<sub>3</sub>) of compound **8i**.

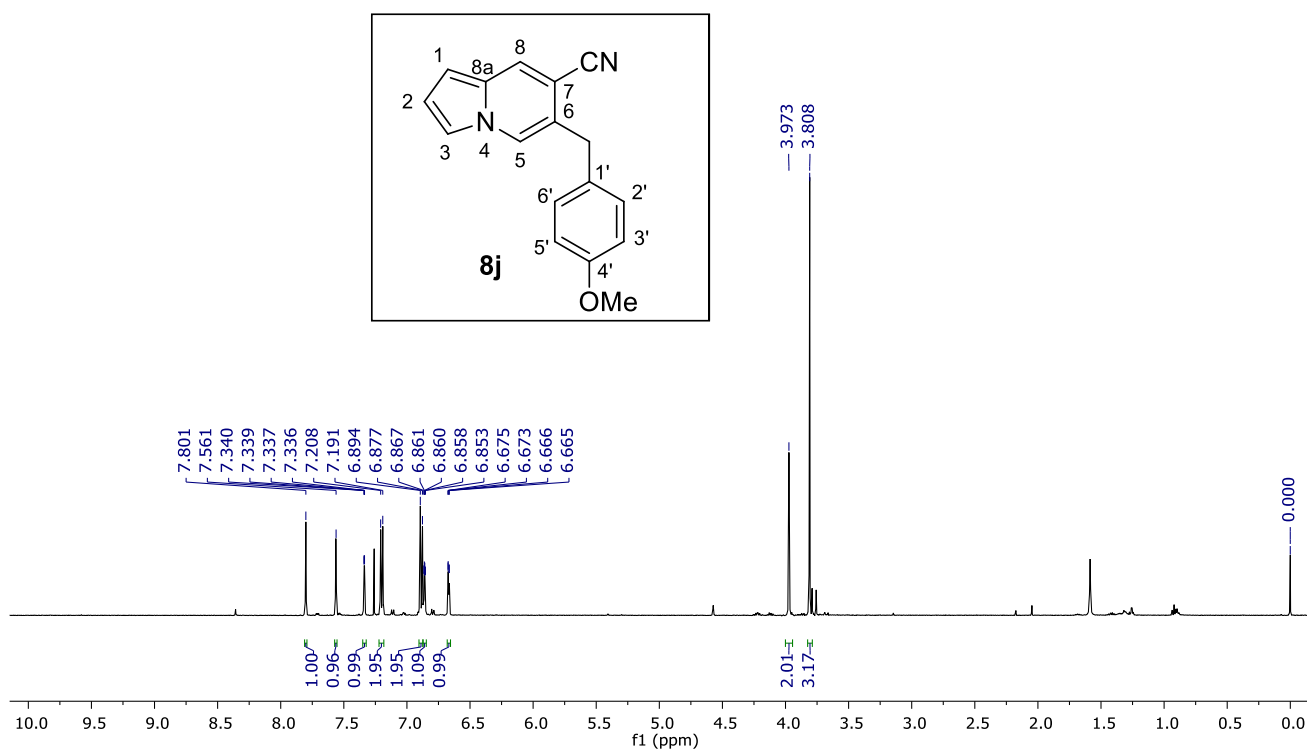

<sup>1</sup>H NMR (500 MHz, CDCl<sub>3</sub>) of compound **8j**.

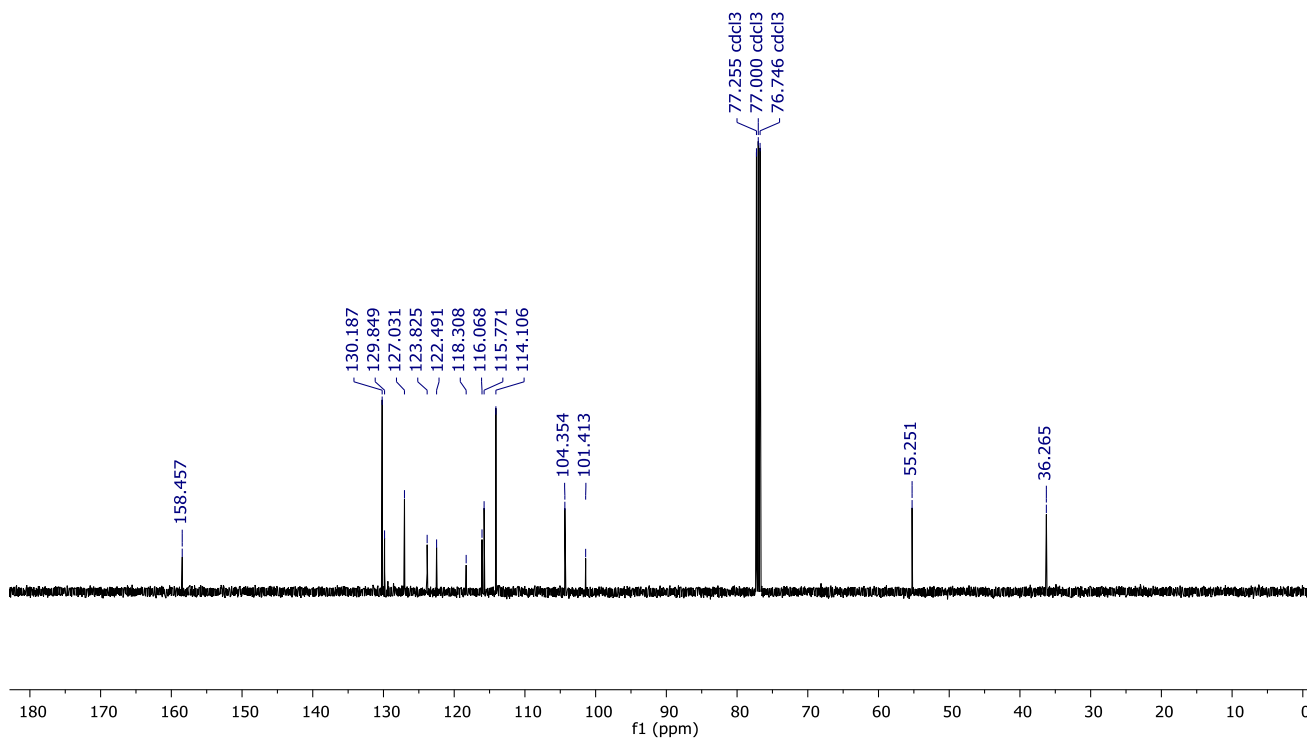

<sup>13</sup>C NMR (125 MHz, CDCl<sub>3</sub>) of compound **8j**.



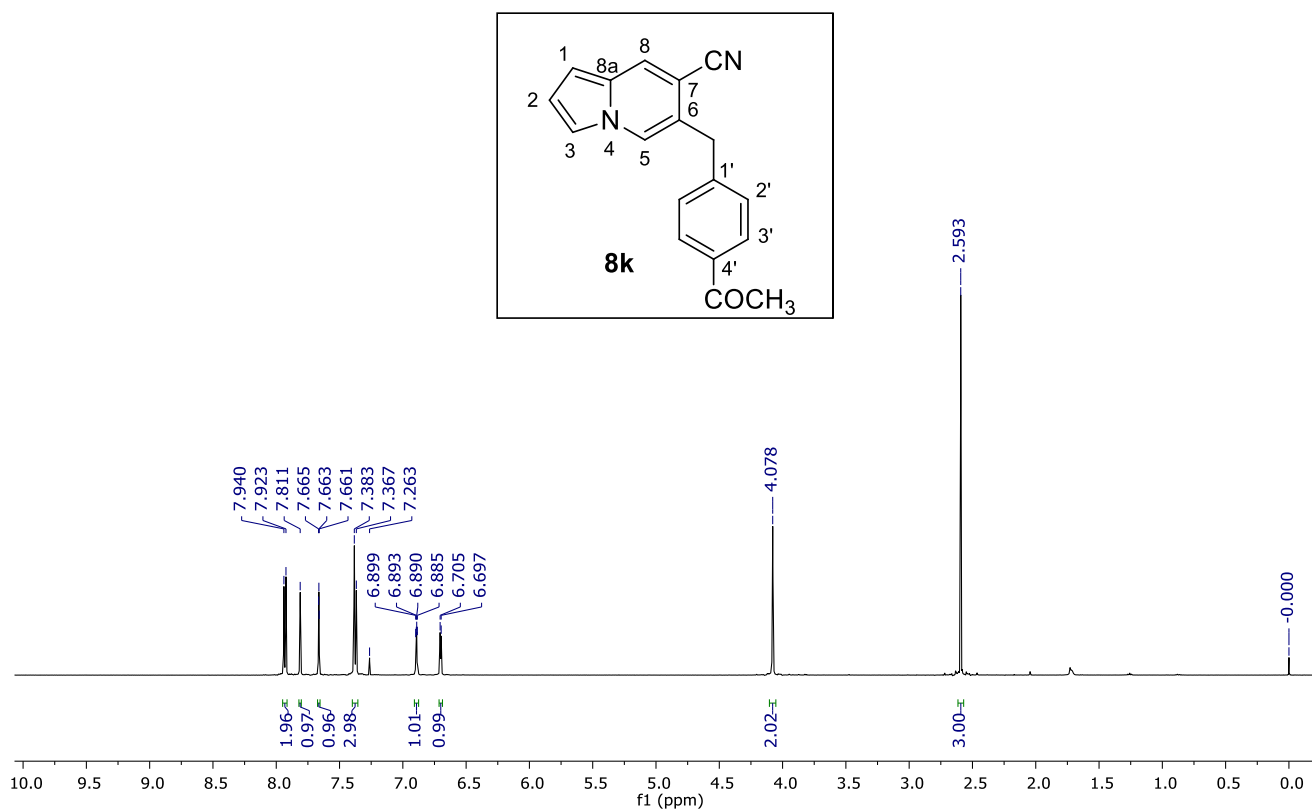

$^1\text{H}$  NMR (500 MHz,  $\text{CDCl}_3$ ) of compound **8k**.

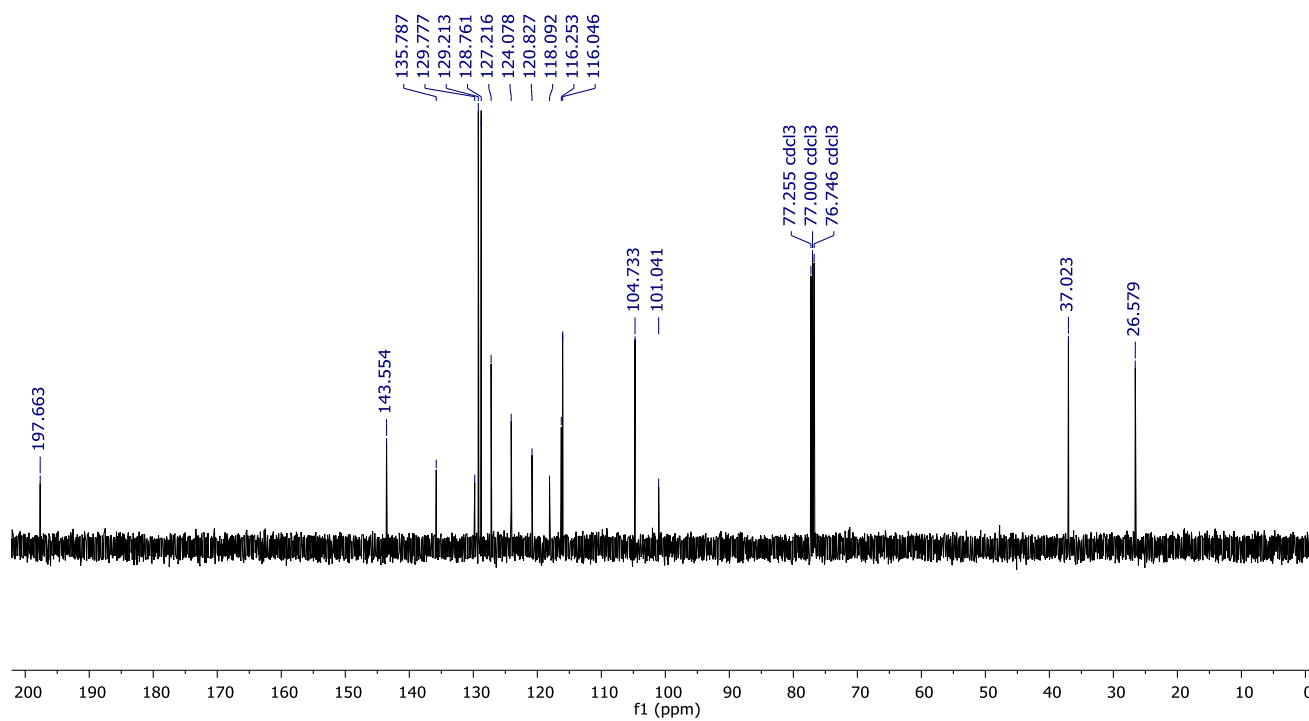

$^{13}\text{C}$  NMR (125 MHz,  $\text{CDCl}_3$ ) of compound **8k**.

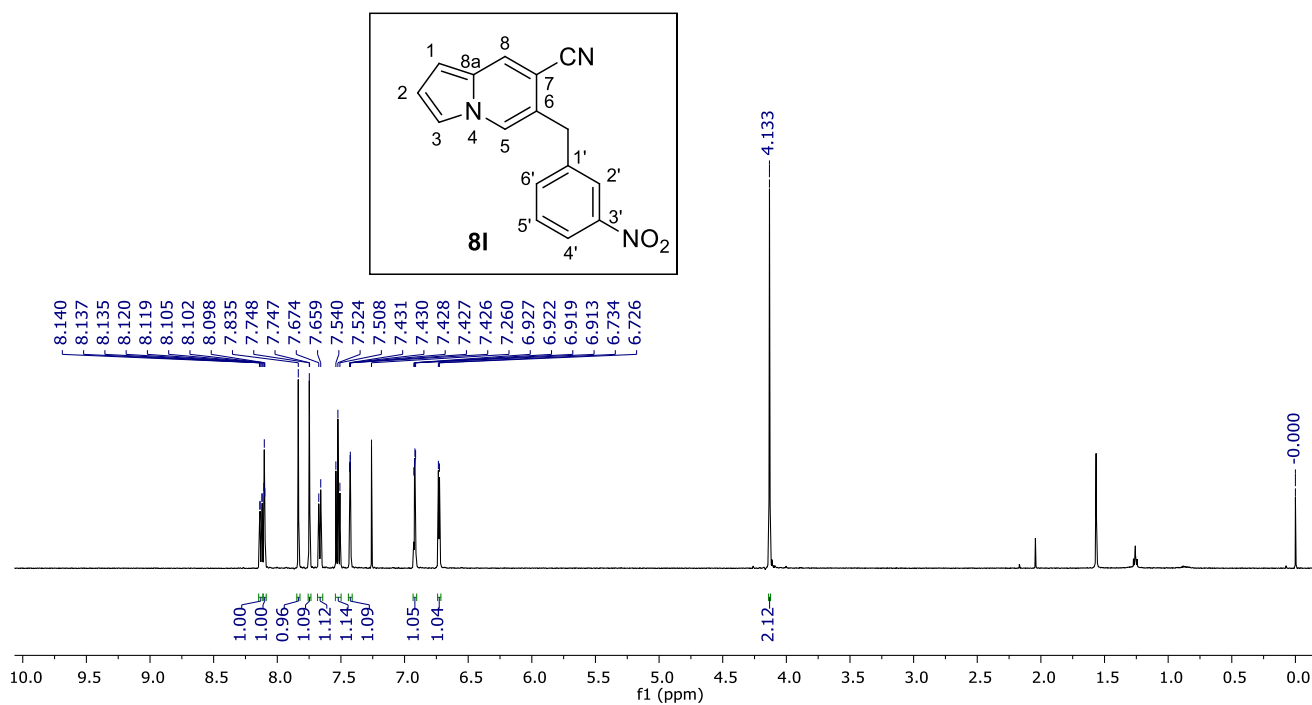

**<sup>1</sup>H NMR (500 MHz, CDCl<sub>3</sub>) of compound **8I**.**

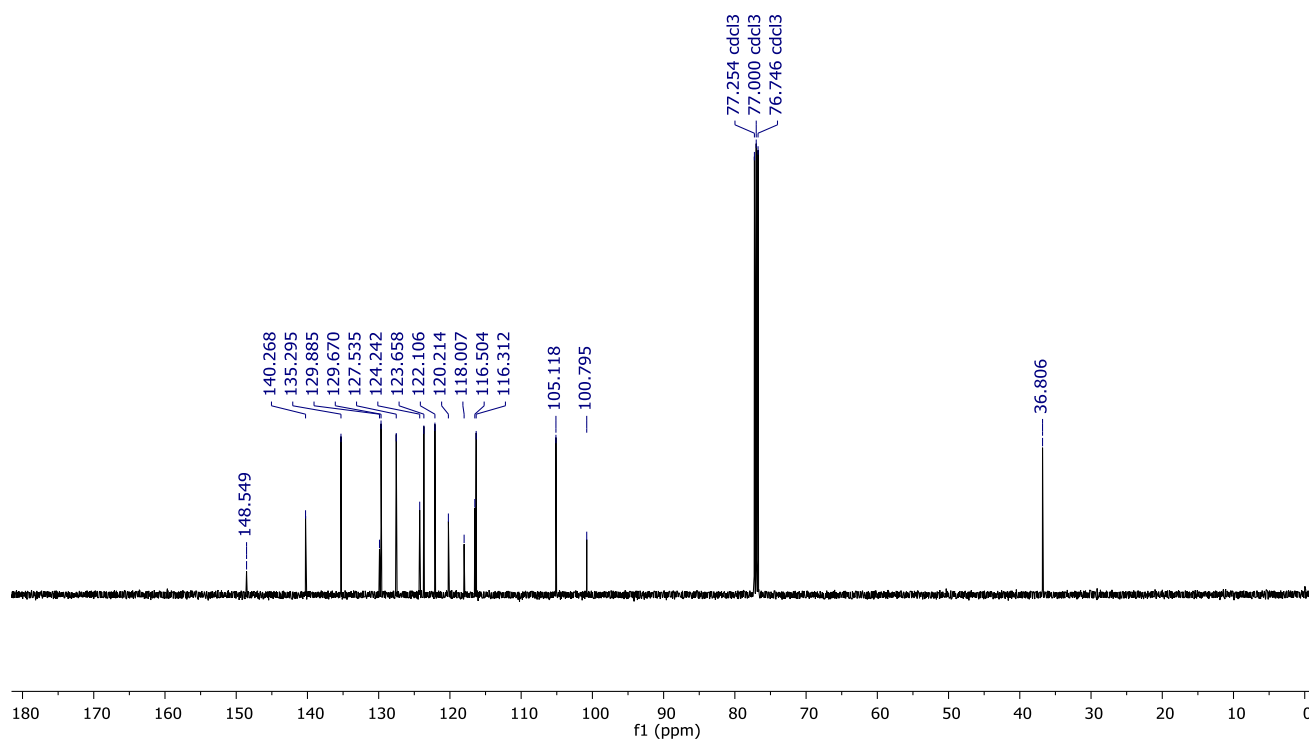

**<sup>13</sup>C NMR (125 MHz, CDCl<sub>3</sub>) of compound **8I**.**

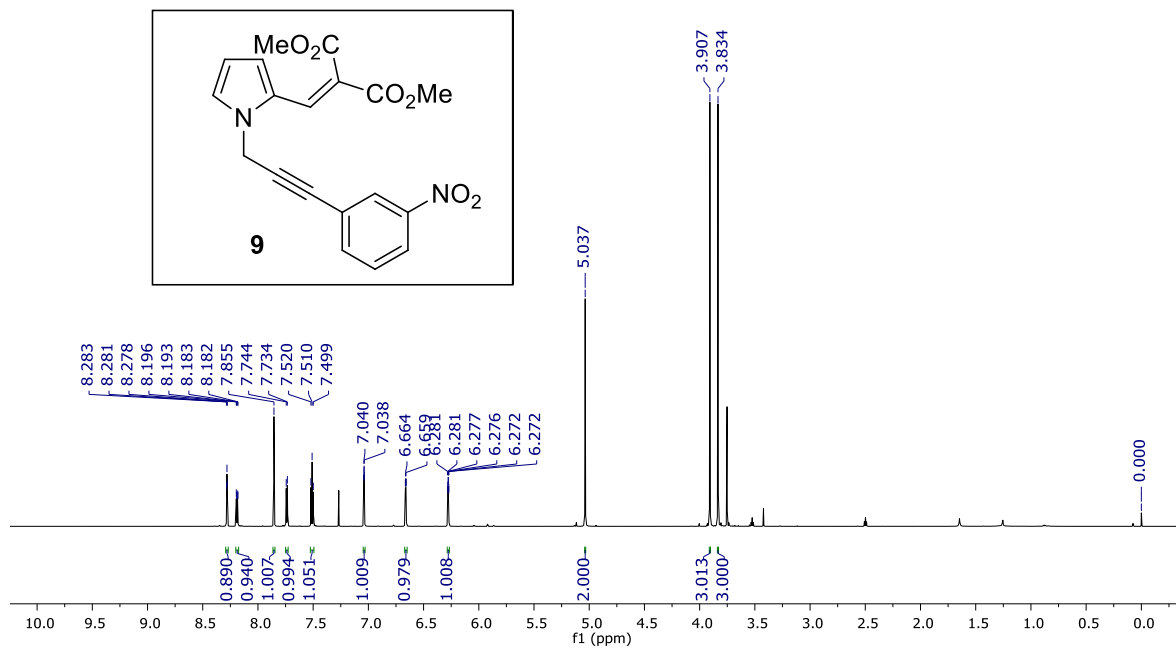

$^1\text{H}$  NMR (750 MHz,  $\text{CDCl}_3$ ) of compound **9**.

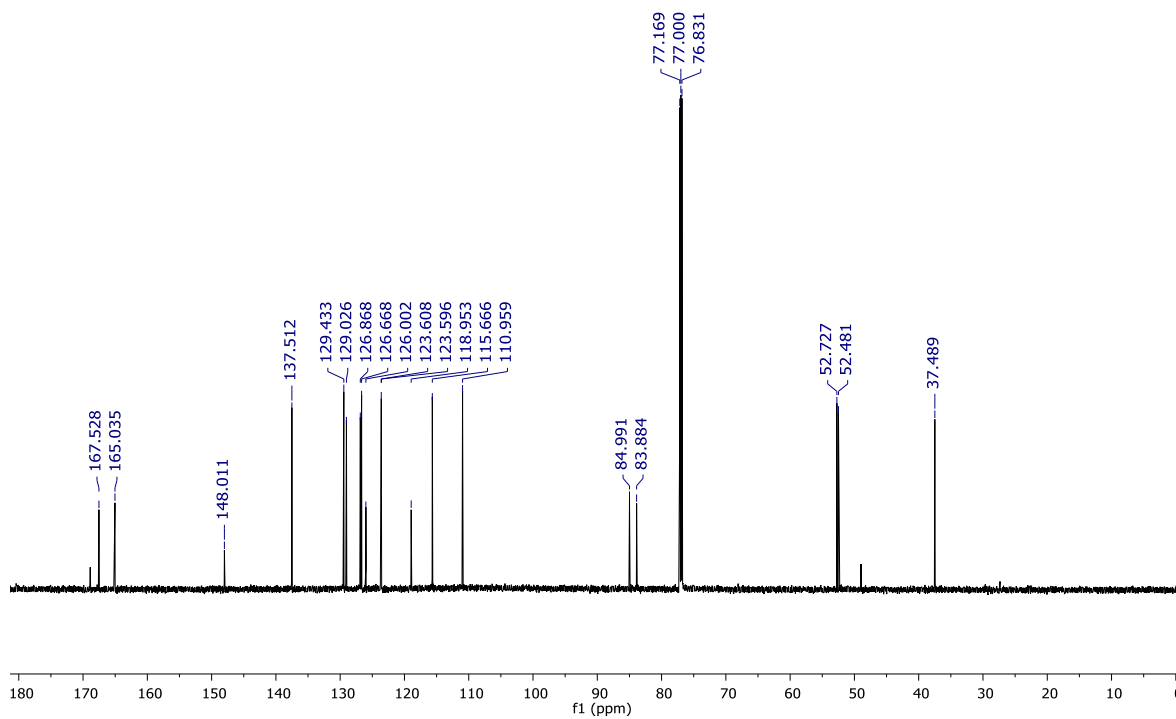

$^{13}\text{C}$  NMR (187.5 MHz,  $\text{CDCl}_3$ ) of compound **9**.

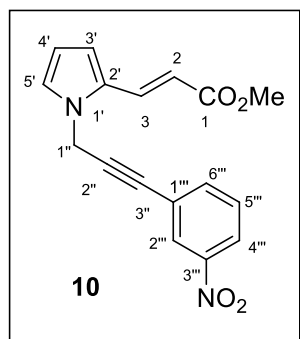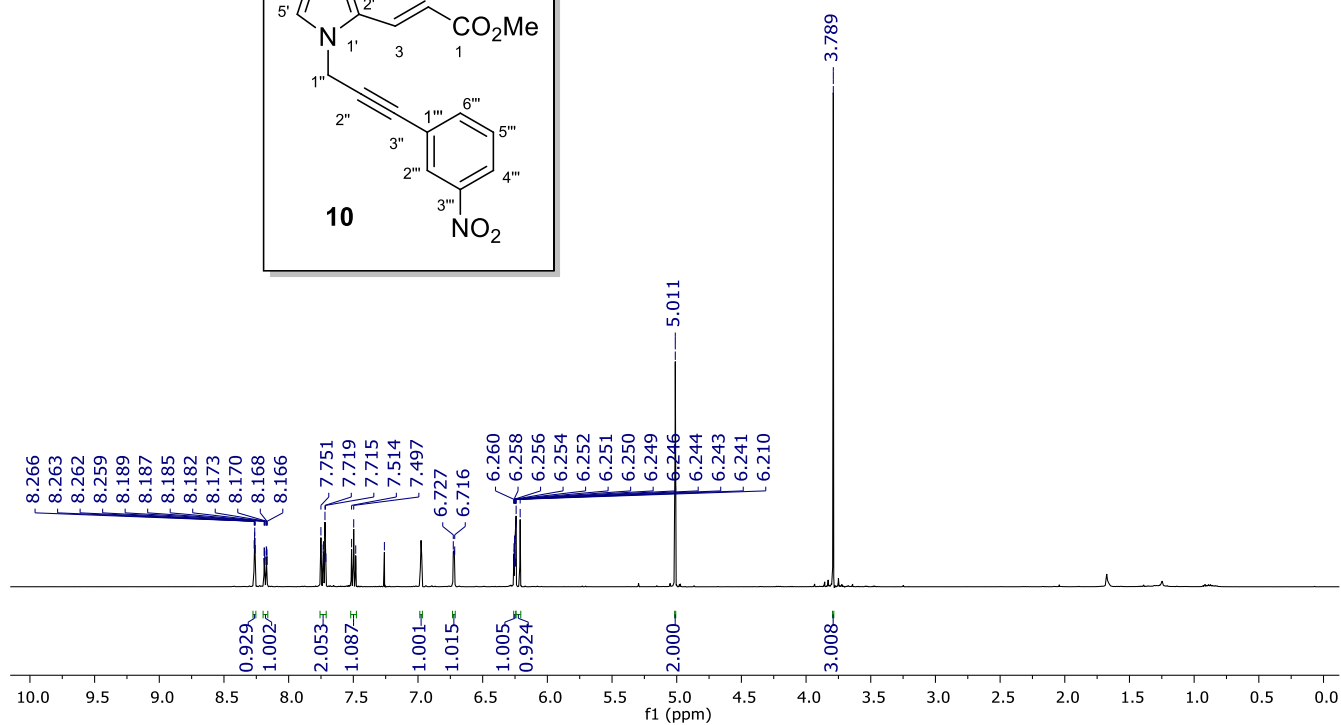

$^1\text{H}$  NMR (500 MHz,  $\text{CDCl}_3$ ) of compound **10**.

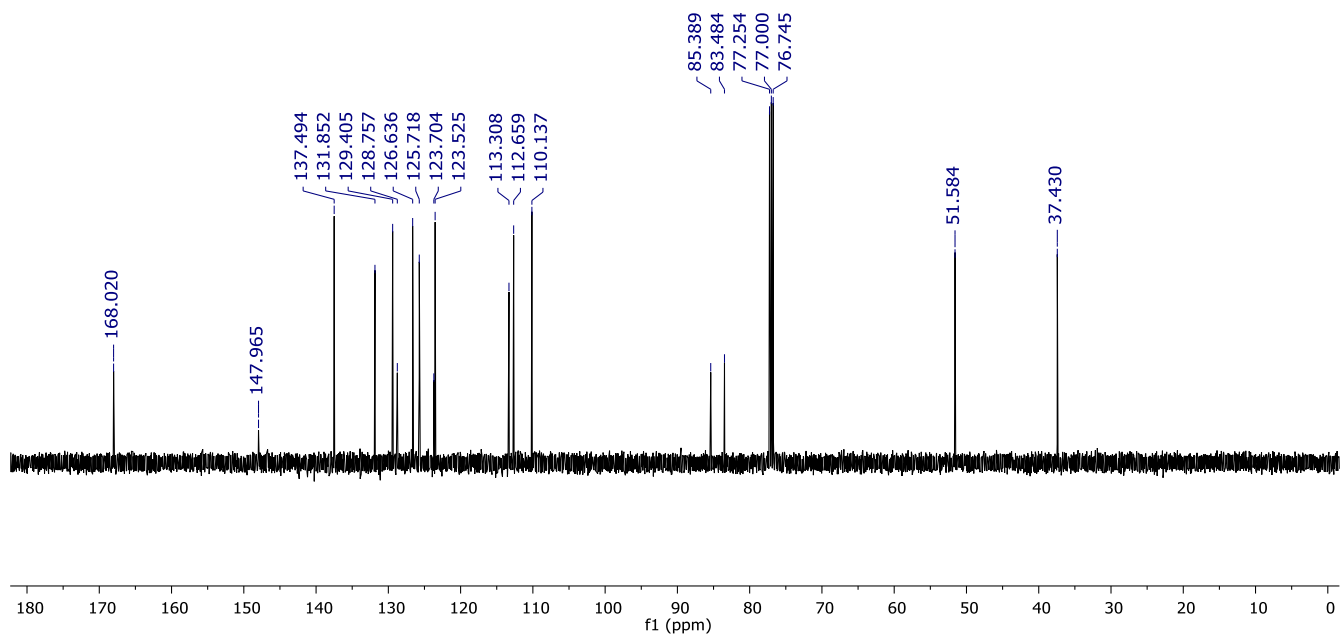

$^{13}\text{C}$  NMR (125 MHz,  $\text{CDCl}_3$ ) of compound **10**.

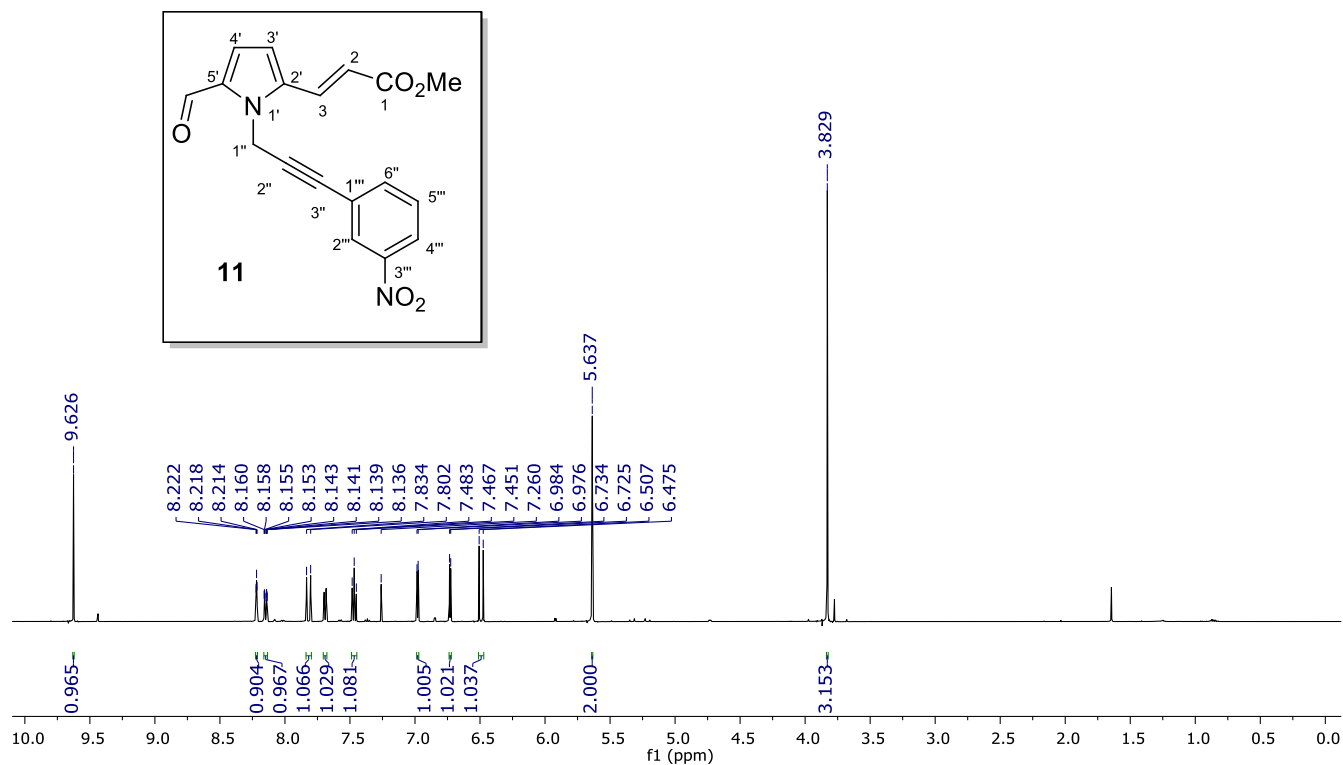

<sup>1</sup>H NMR (500 MHz, CDCl<sub>3</sub>) of compound **11**.

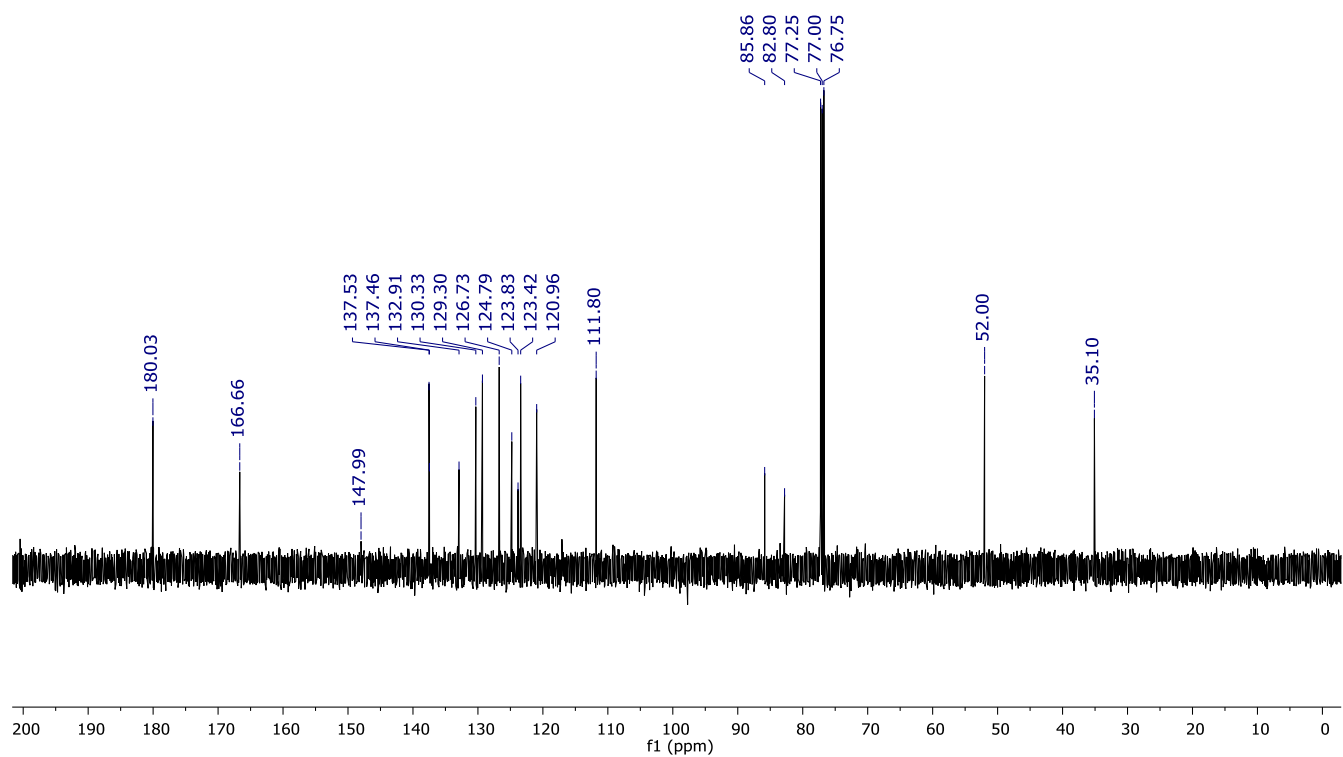

<sup>13</sup>C NMR (125 MHz, CDCl<sub>3</sub>) of compound **11**.

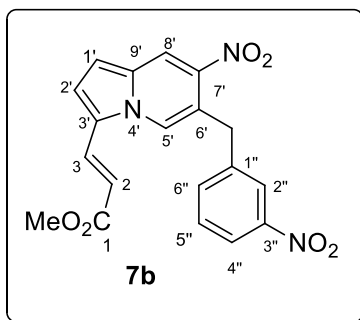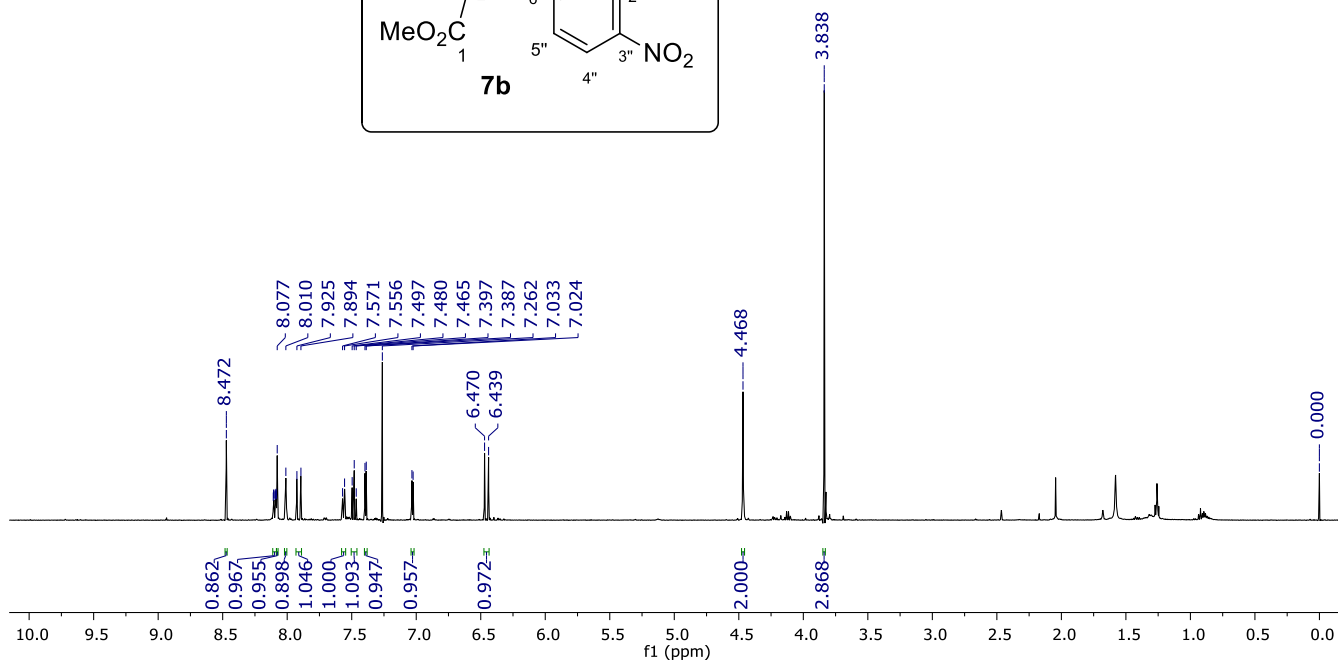

<sup>1</sup>H NMR (500 MHz, CDCl<sub>3</sub>) of compound **7b**.

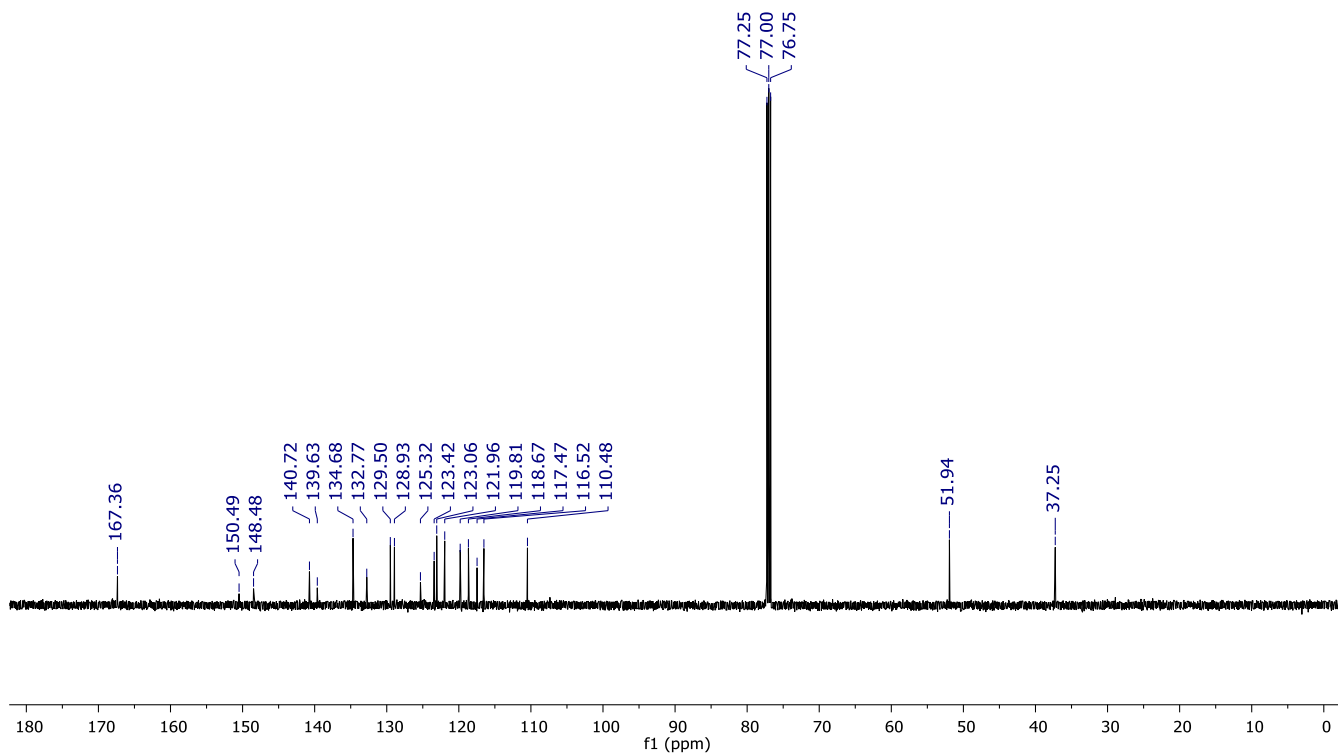

<sup>13</sup>C NMR (125 MHz, CDCl<sub>3</sub>) of compound **7b**.

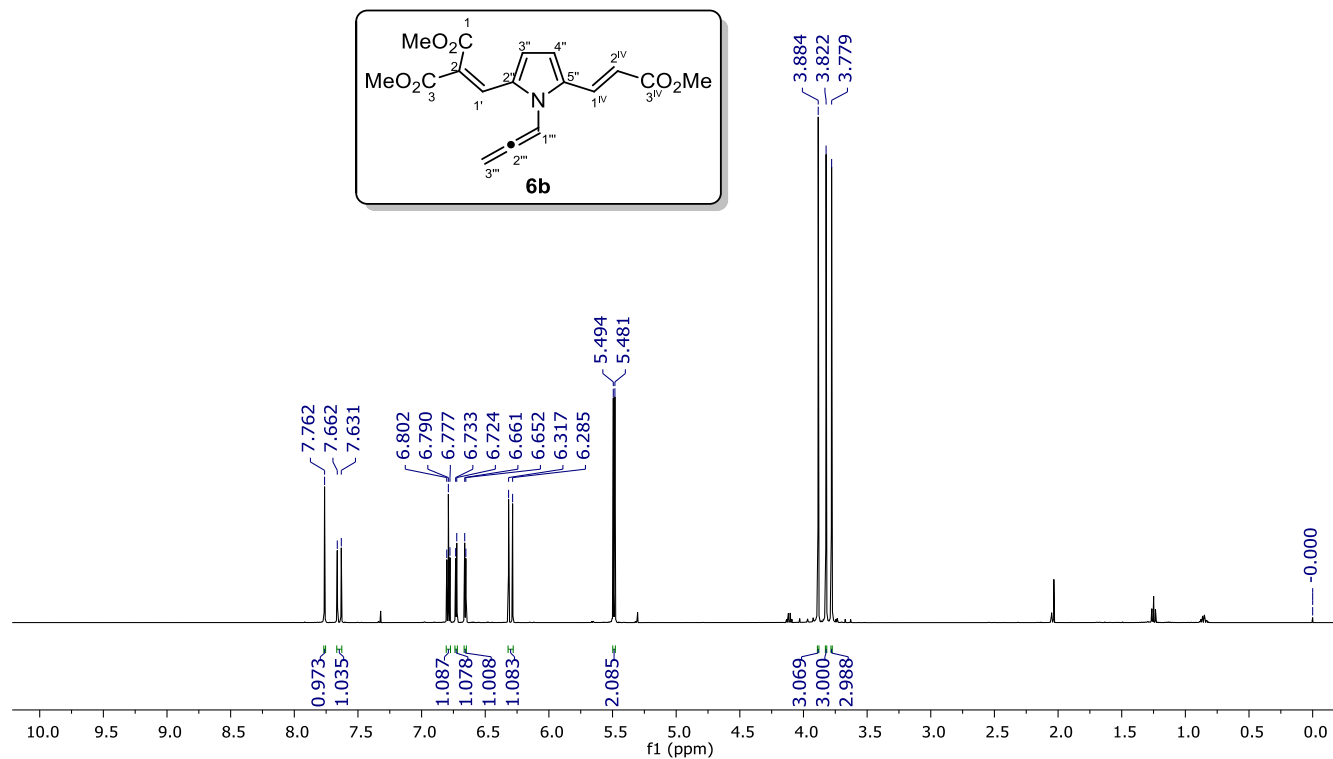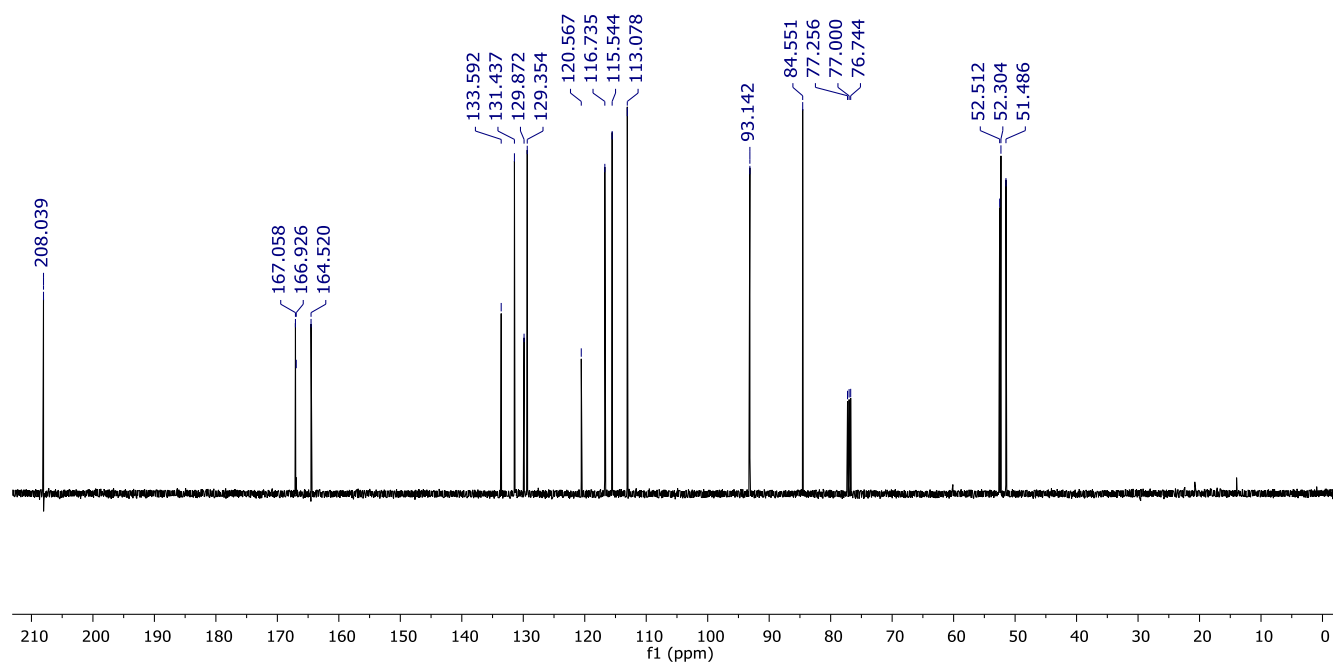

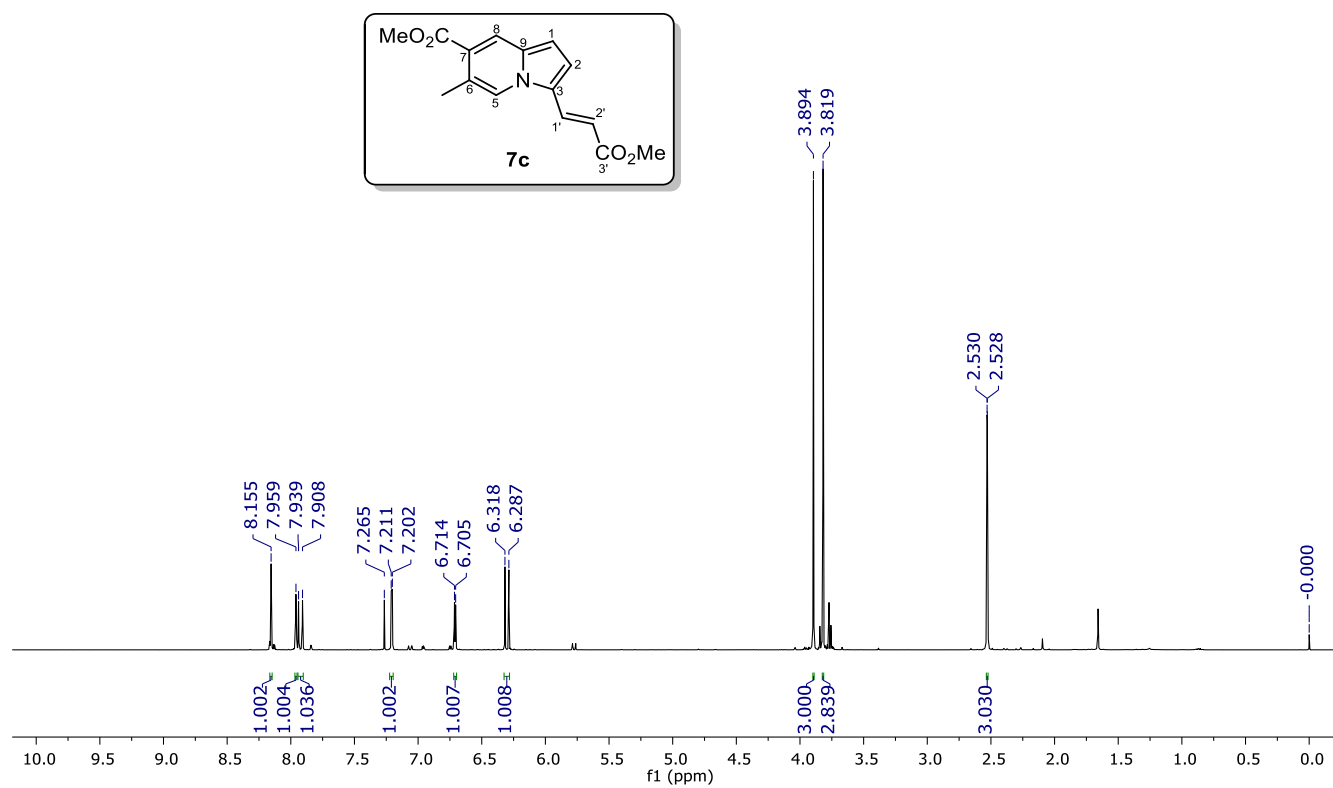

<sup>1</sup>H NMR (500 MHz, CDCl<sub>3</sub>) of compound **7c**.

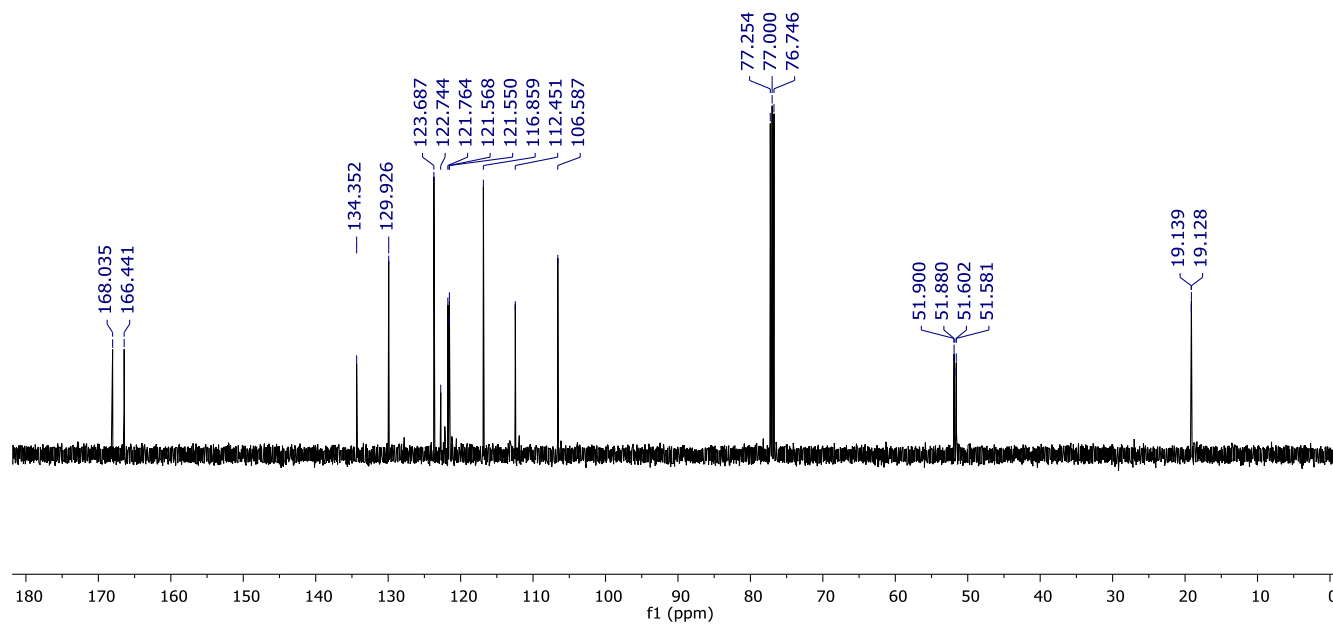

<sup>13</sup>C NMR (125 MHz, CDCl<sub>3</sub>) of compound **7c**.



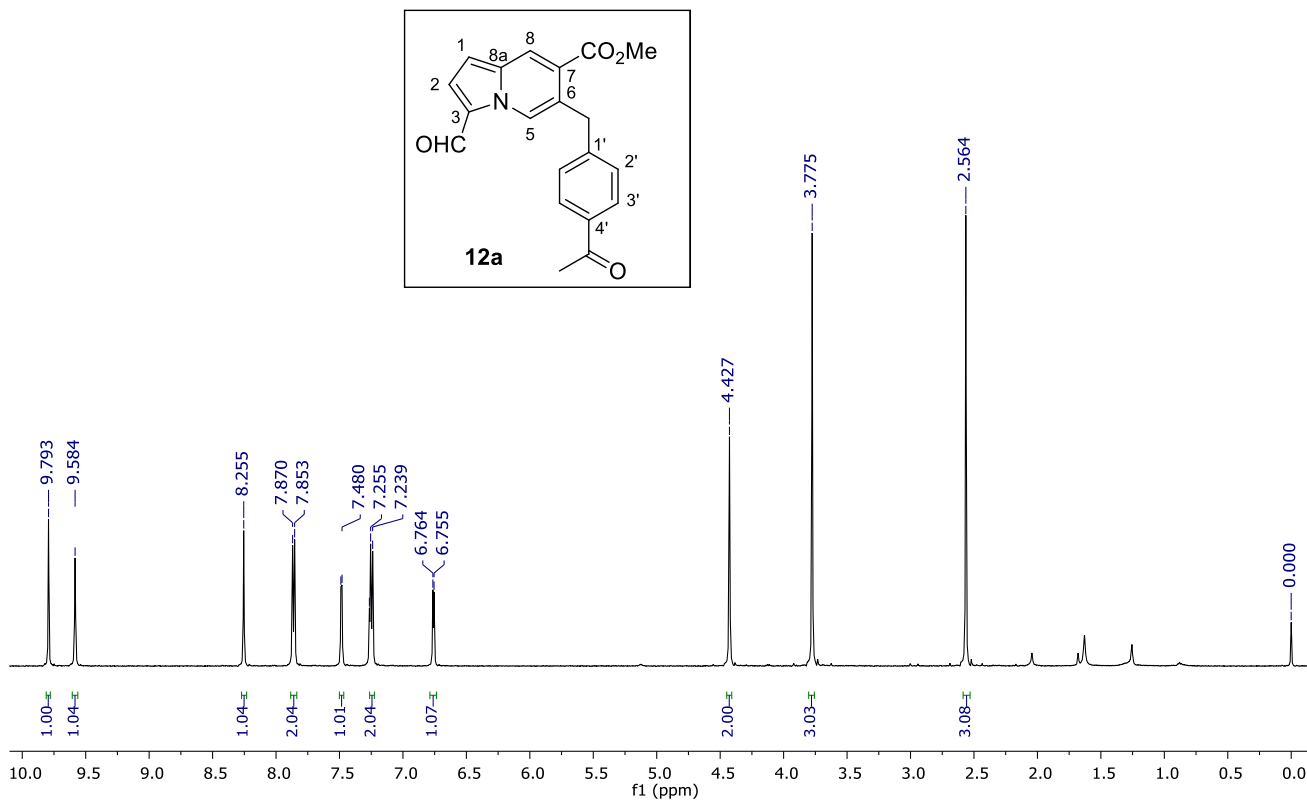

<sup>1</sup>H NMR (600 MHz, CDCl<sub>3</sub>) of compound **12a**.

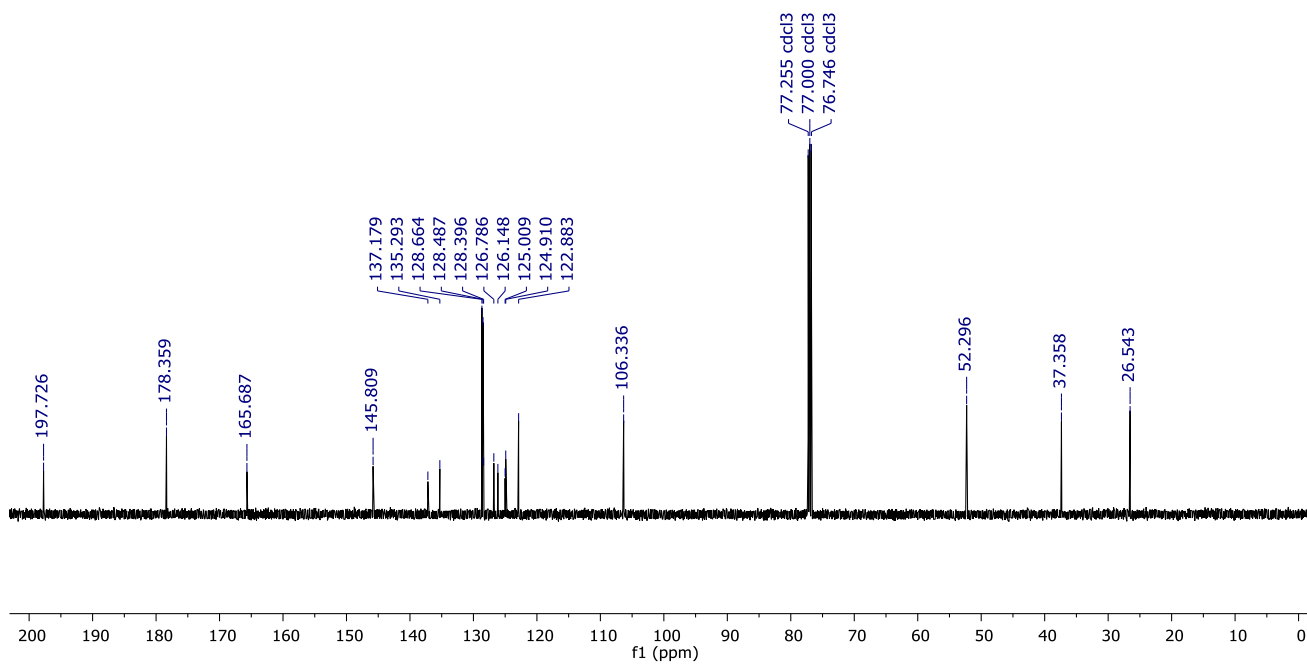

<sup>13</sup>C NMR (150 MHz, CDCl<sub>3</sub>) of compound **12a**.

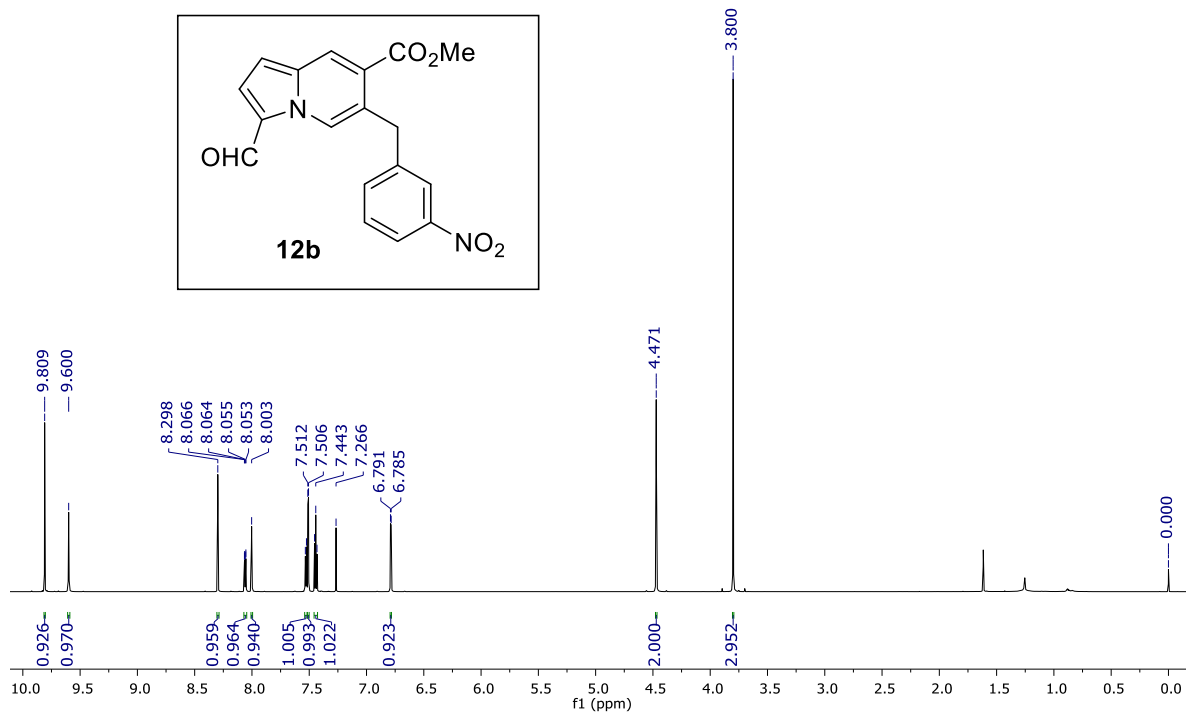

<sup>1</sup>H NMR (750 MHz, CDCl<sub>3</sub>) of compound **12b**.

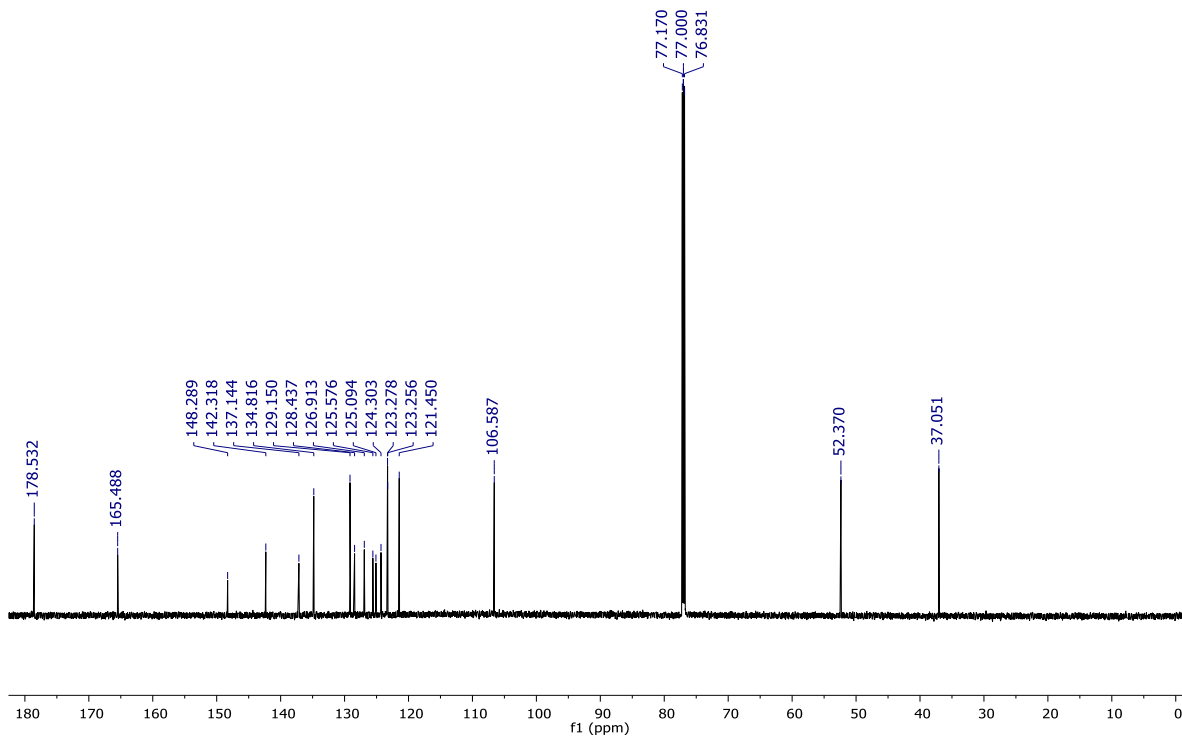

<sup>13</sup>C NMR (187.5 MHz, CDCl<sub>3</sub>) of compound **12b**.

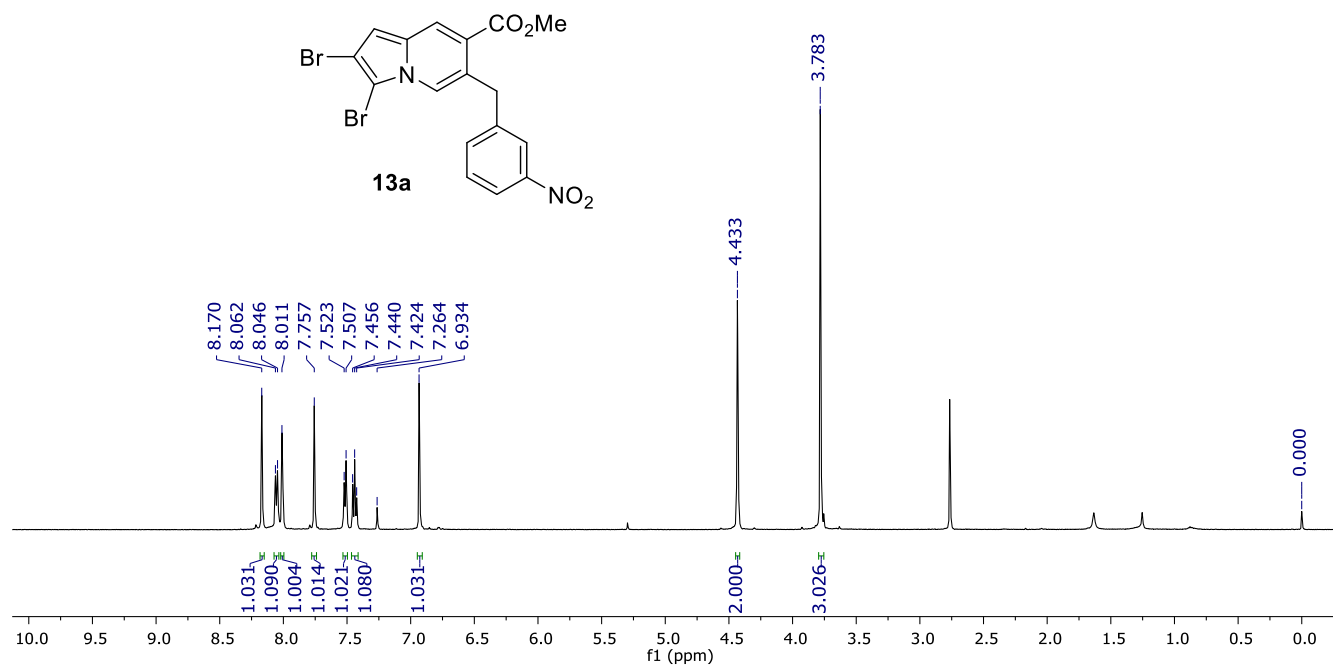

<sup>1</sup>H NMR (500 MHz, CDCl<sub>3</sub>) of compound **13a**.

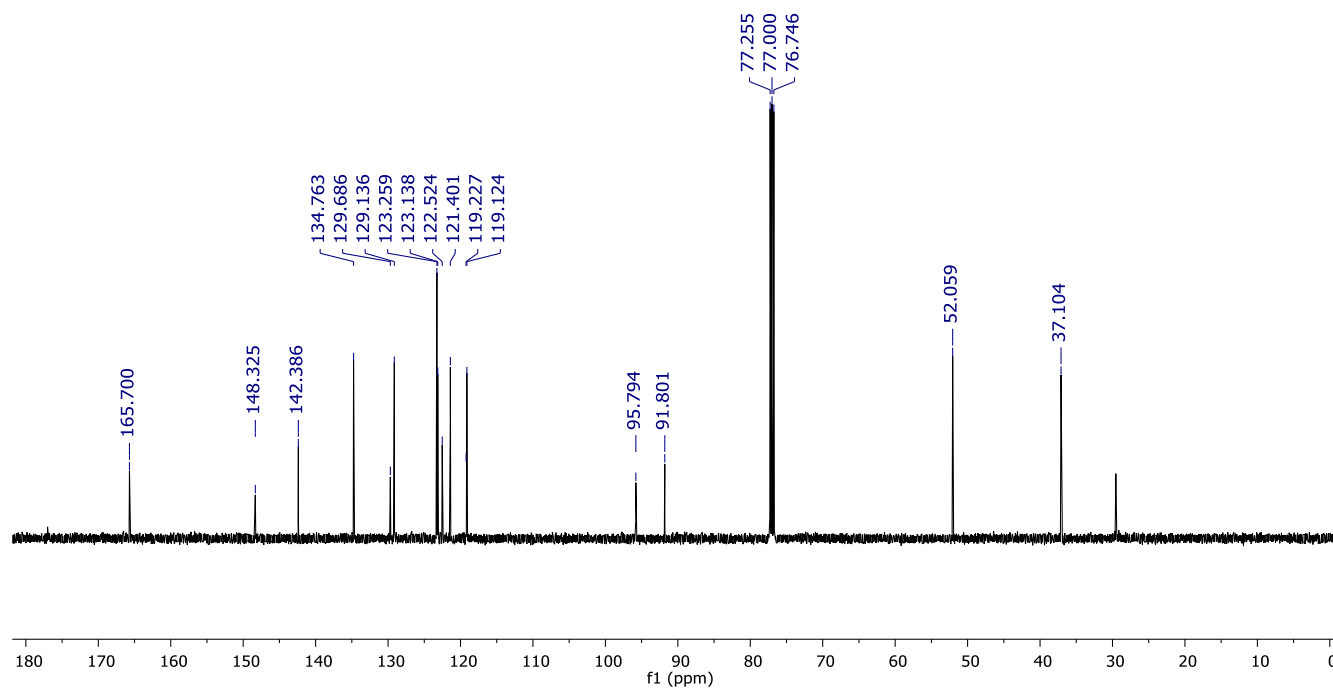

<sup>13</sup>C NMR (125 MHz, CDCl<sub>3</sub>) of compound **13a**.

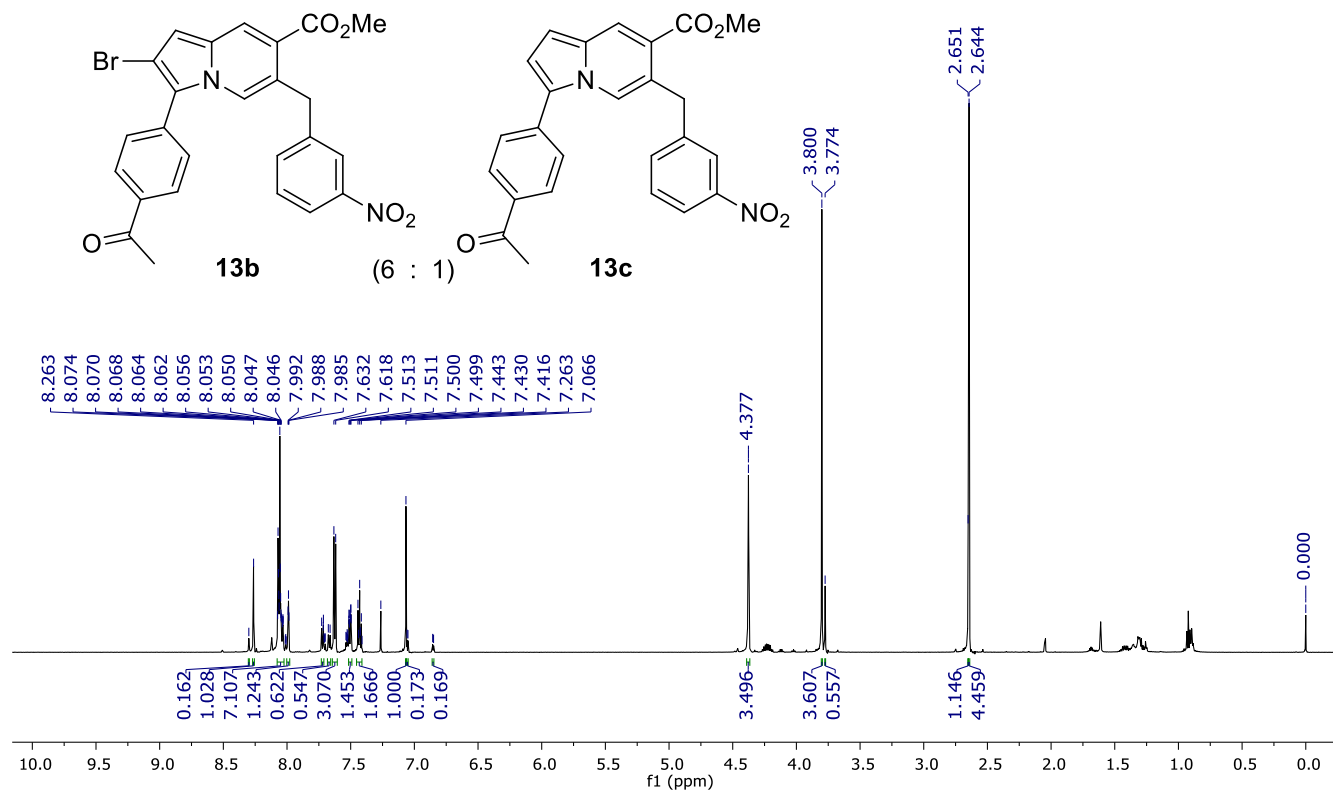

**<sup>1</sup>H NMR (600 MHz, CDCl<sub>3</sub>) of compounds 13b/13c.**

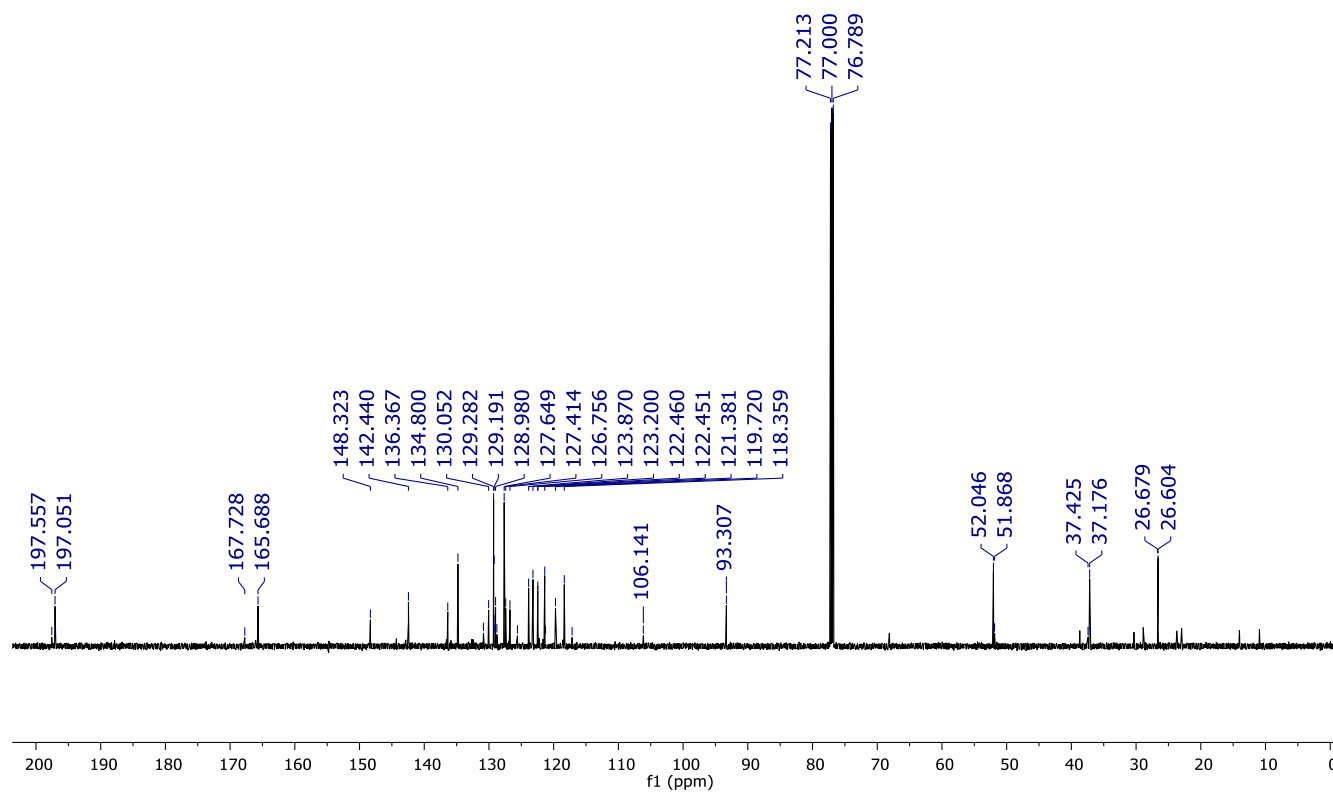

**<sup>13</sup>C NMR (150 MHz, CDCl<sub>3</sub>) of compounds 13b/13c.**

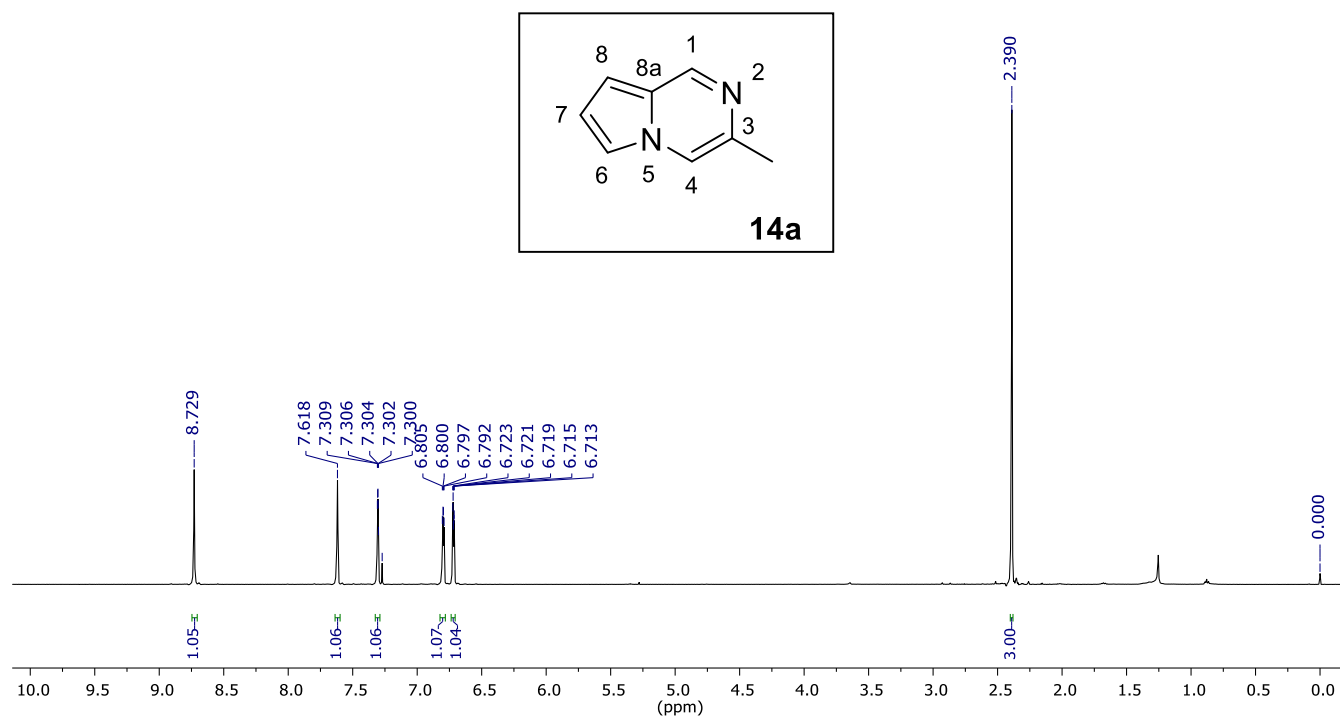

$^1\text{H}$  NMR (500 MHz,  $\text{CDCl}_3$ ) of compound **14a**.

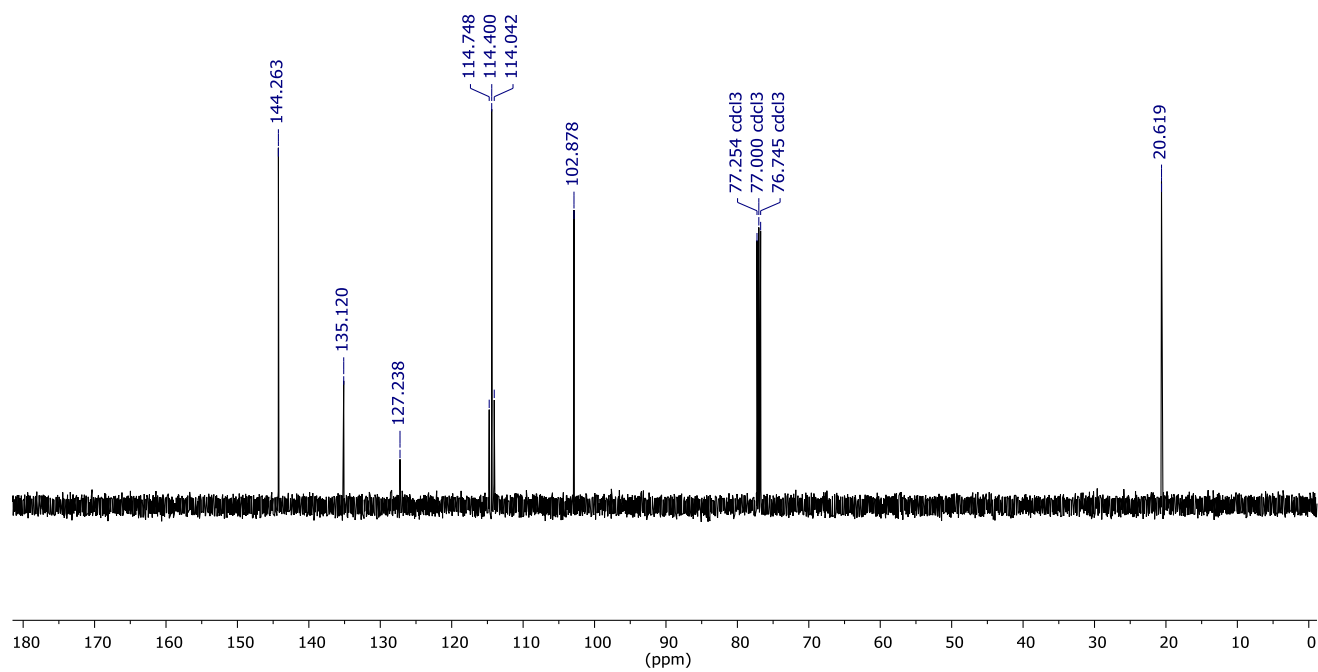

$^{13}\text{C}$  NMR (125 MHz,  $\text{CDCl}_3$ ) of compound **14a**.

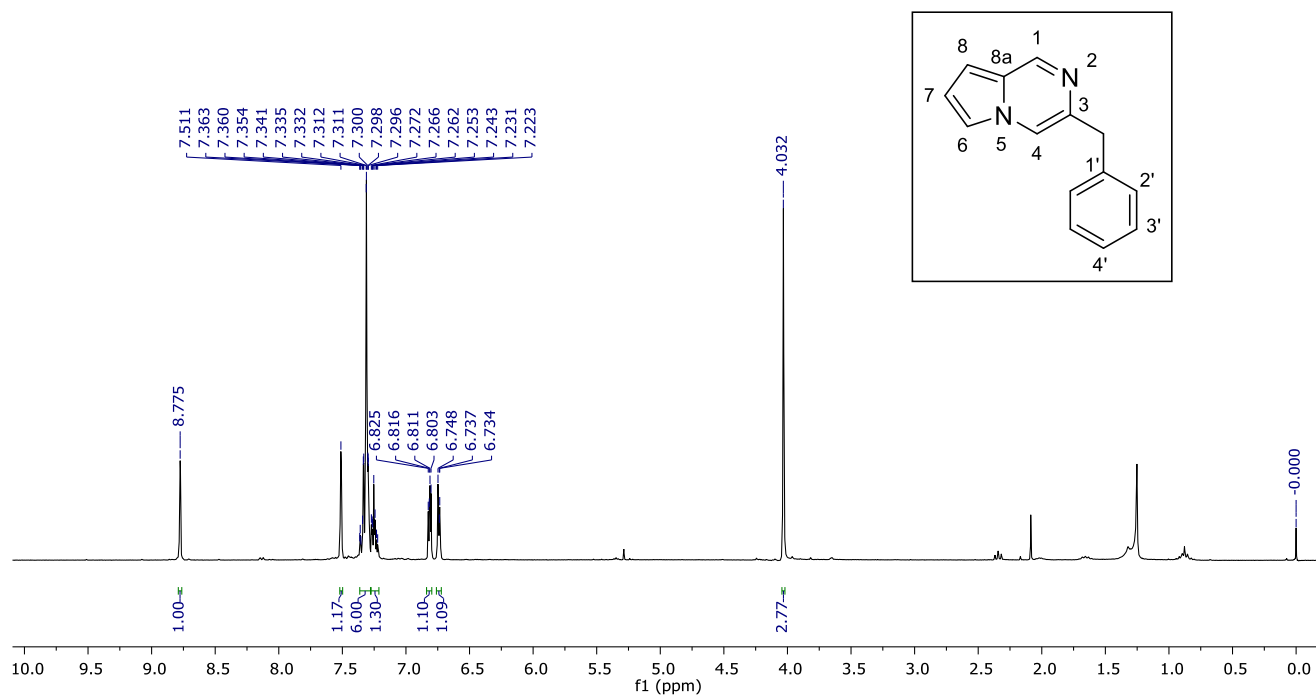

$^1\text{H NMR}$  (300 MHz,  $\text{CDCl}_3$ ) of compound **14b**.

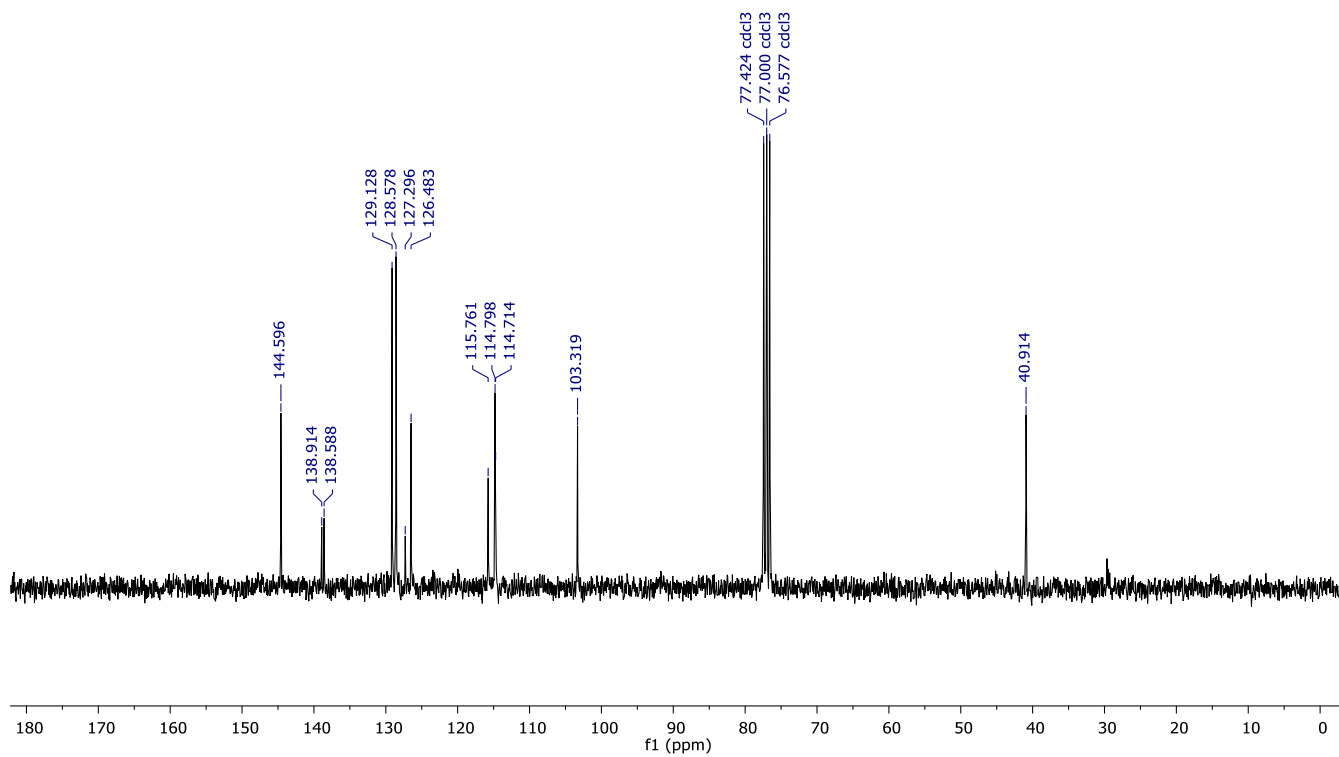

$^{13}\text{C NMR}$  (75.4 MHz,  $\text{CDCl}_3$ ) of compound **14b**.

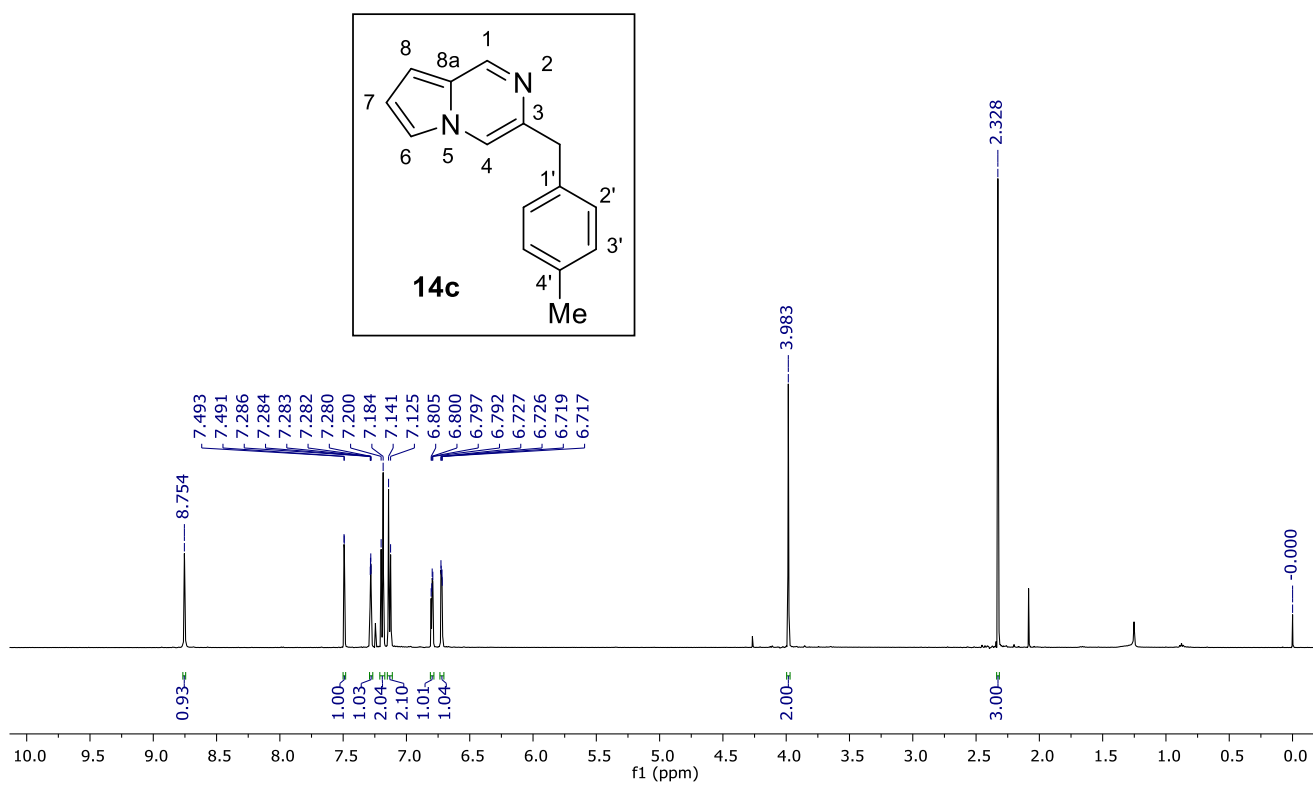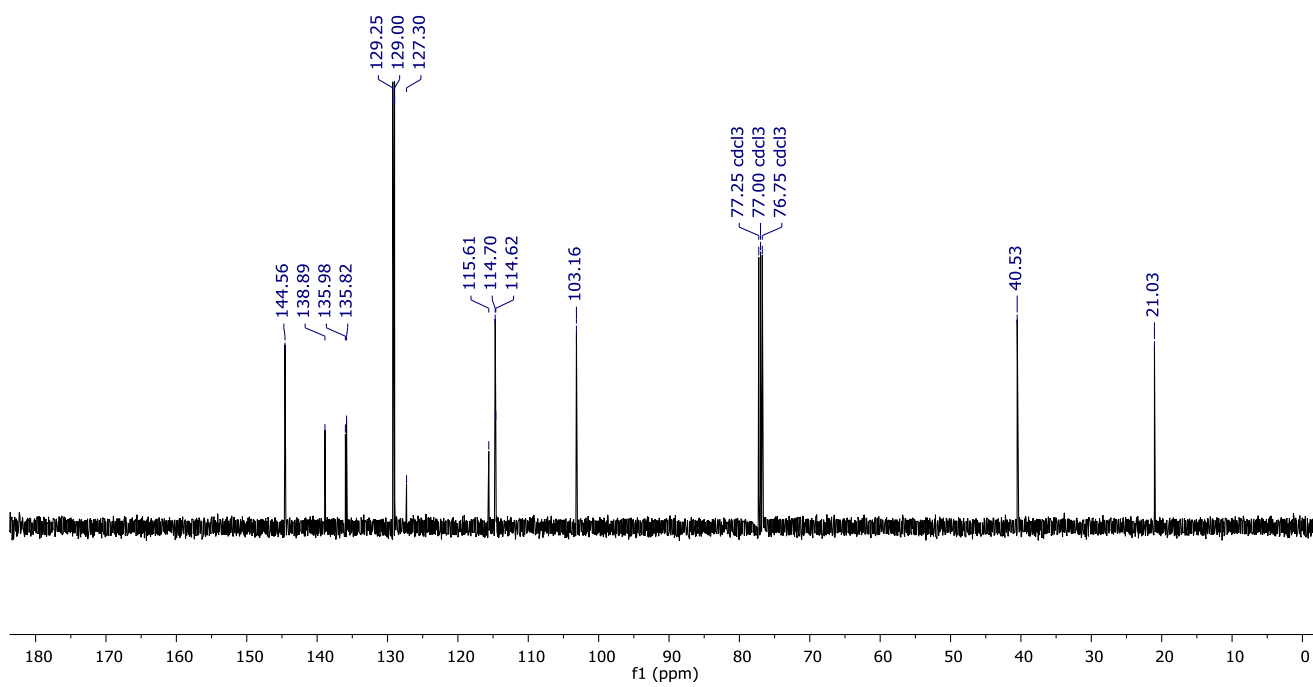

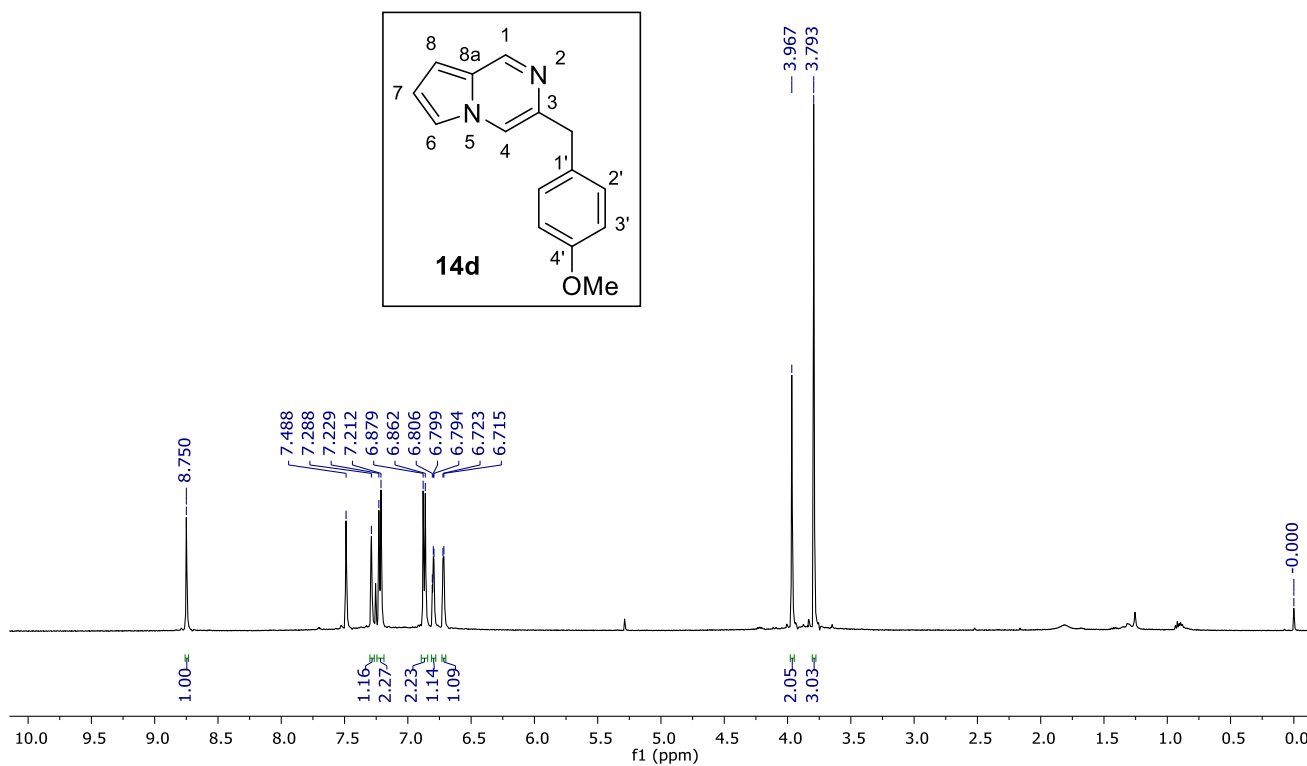

<sup>1</sup>H NMR (500 MHz, CDCl<sub>3</sub>) of compound **14d**.

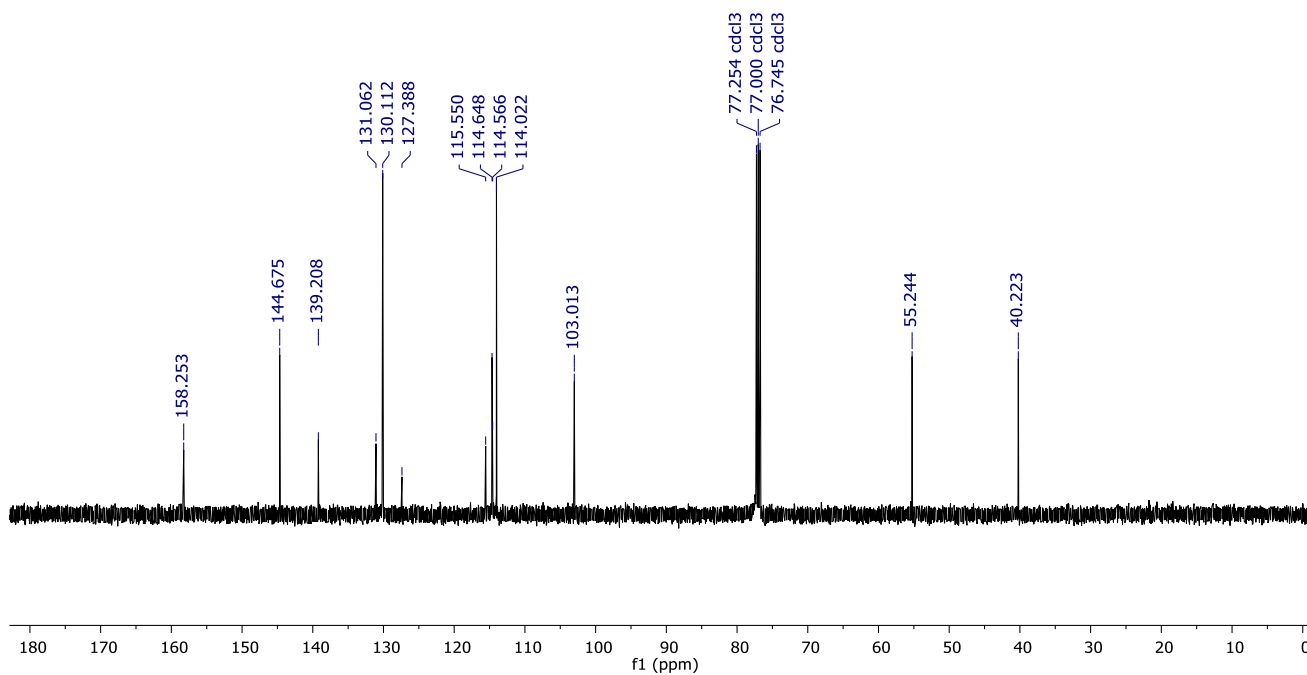

<sup>13</sup>C NMR (125 MHz, CDCl<sub>3</sub>) of compound **14d**.



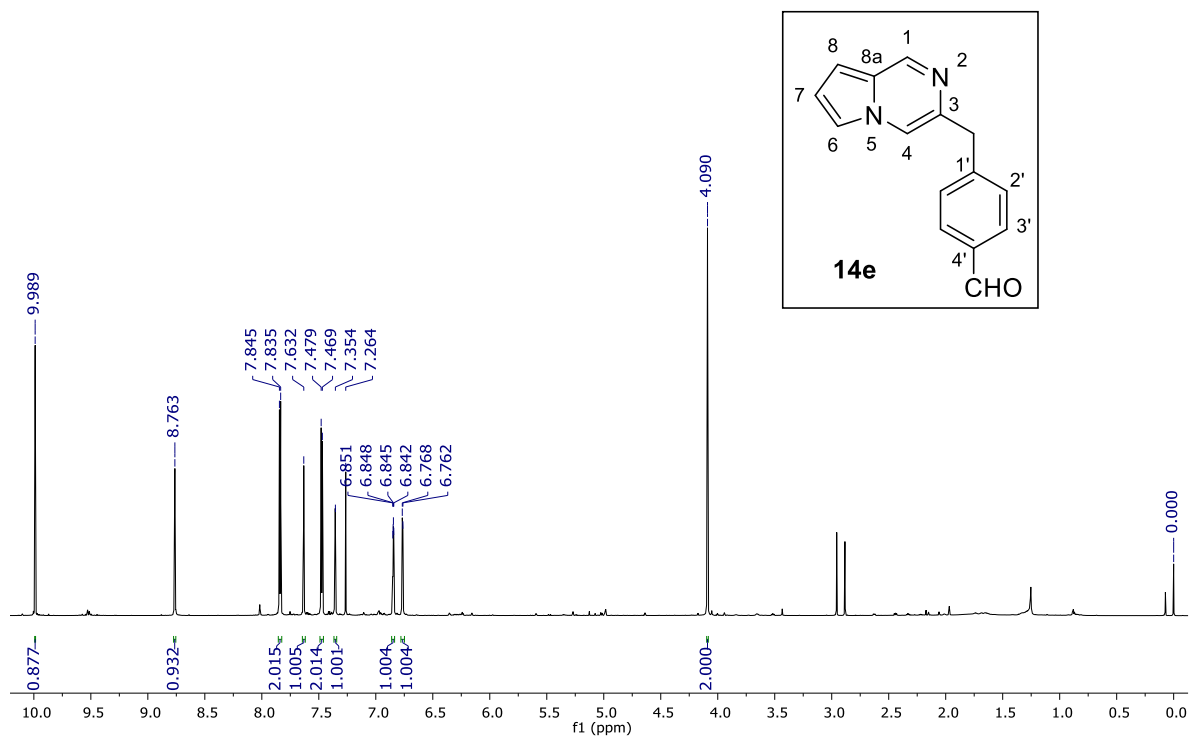

<sup>1</sup>H NMR (750 MHz, CDCl<sub>3</sub>) of compound **14e**.

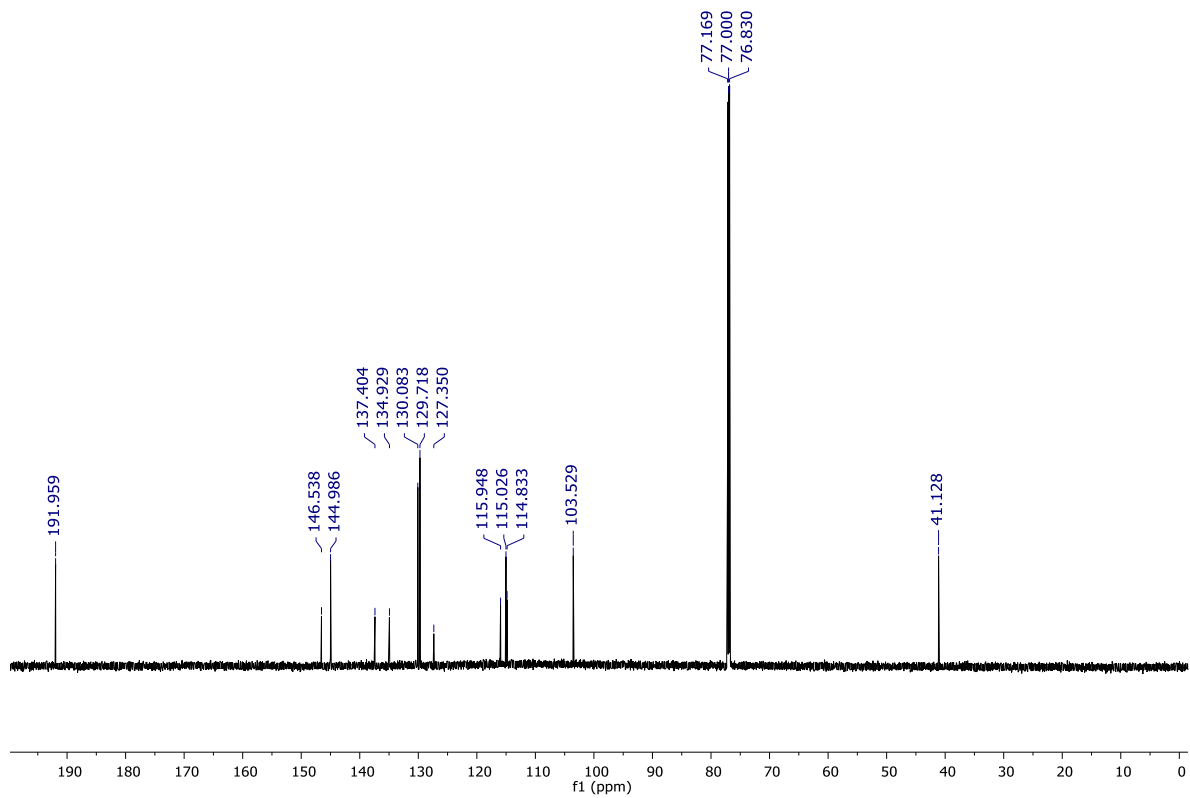

<sup>13</sup>C NMR (187.5 MHz, CDCl<sub>3</sub>) of compound **14e**.

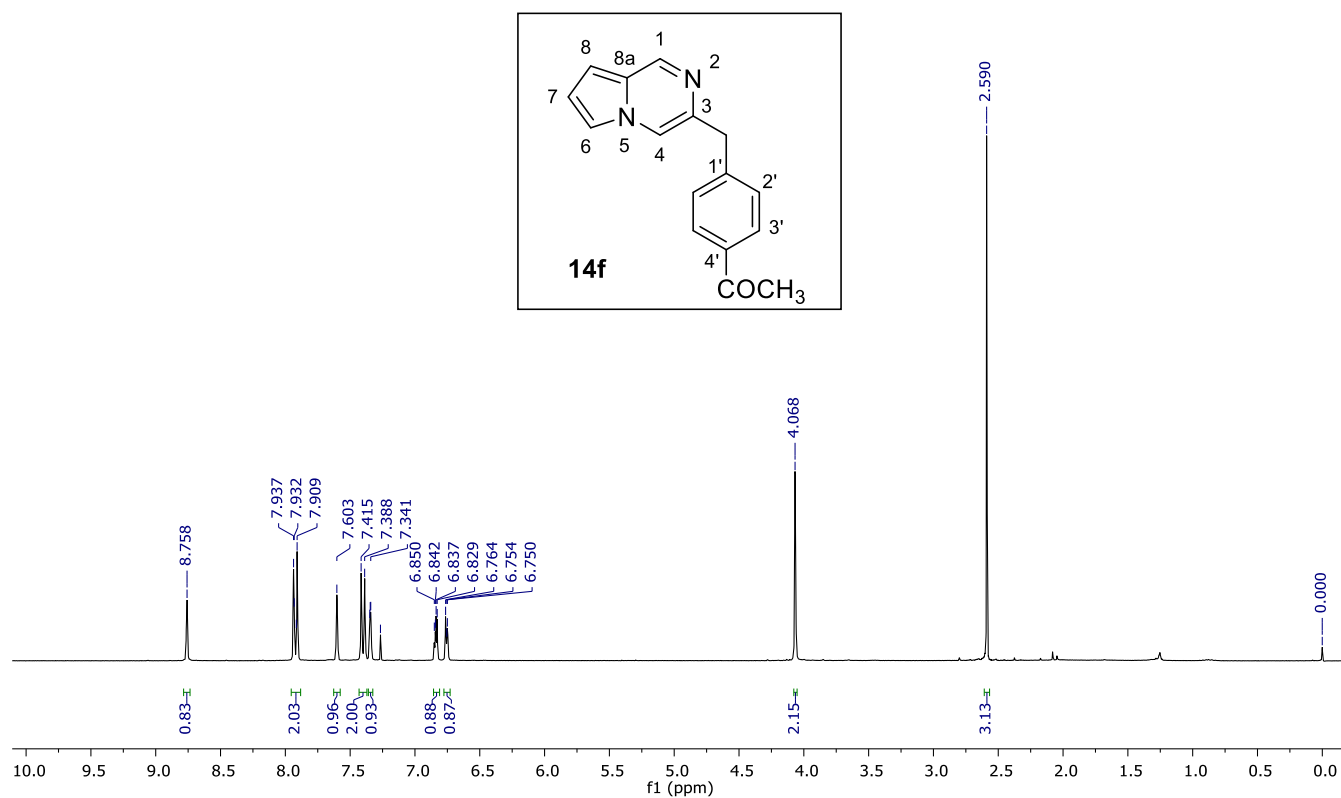

<sup>1</sup>H NMR (300 MHz, CDCl<sub>3</sub>) of compound **14f**.

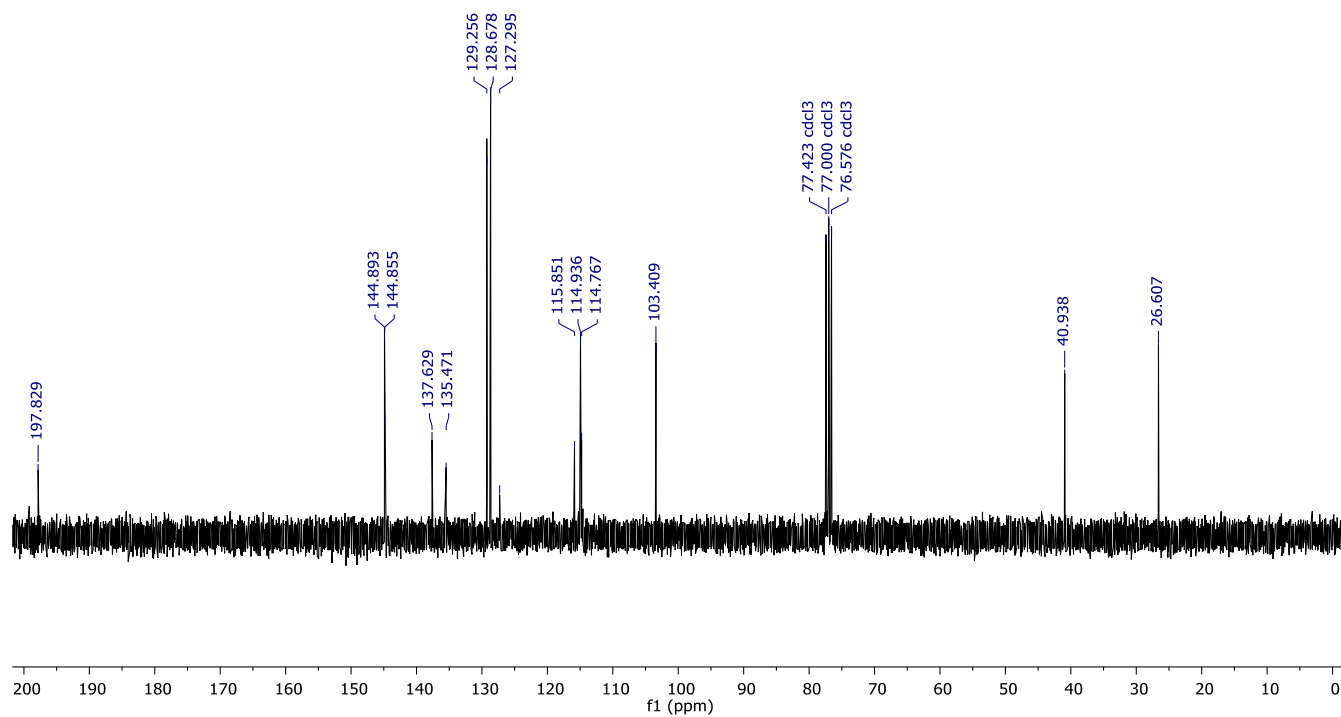

<sup>13</sup>C NMR (75.4 MHz, CDCl<sub>3</sub>) of compound **14f**.

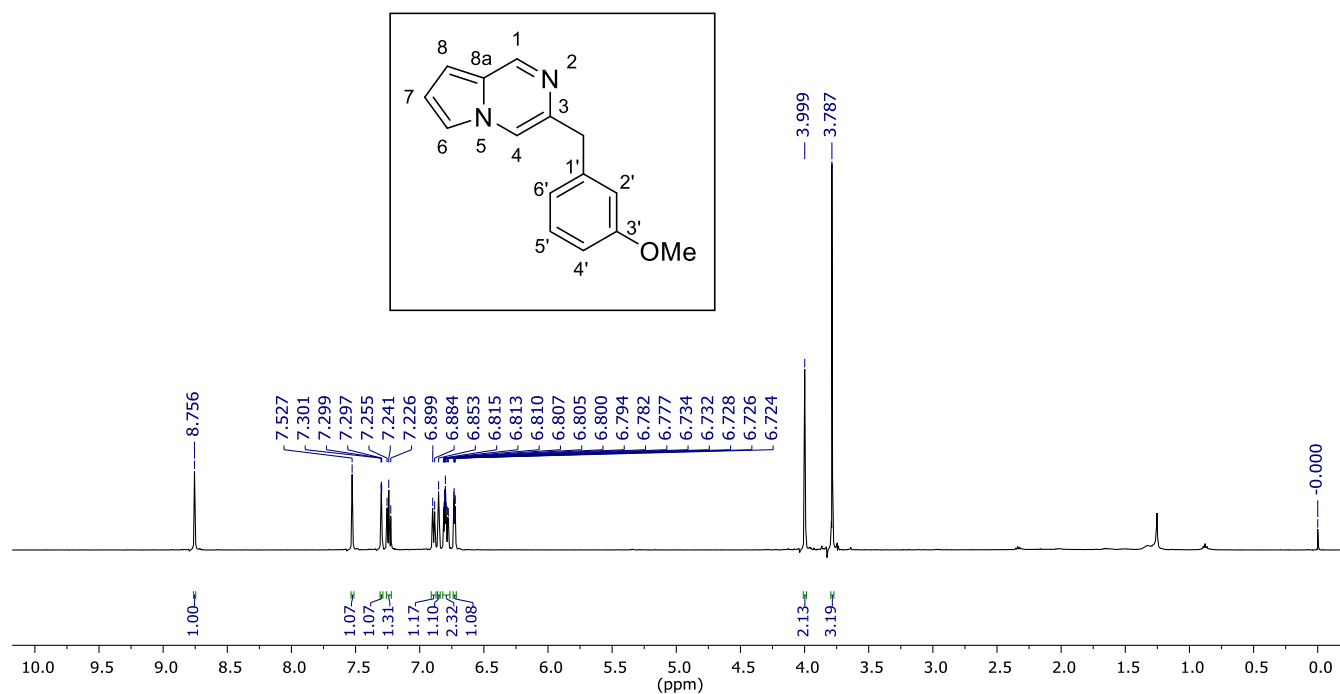

$^1\text{H NMR}$  (500 MHz,  $\text{CDCl}_3$ ) of compound **14g**.

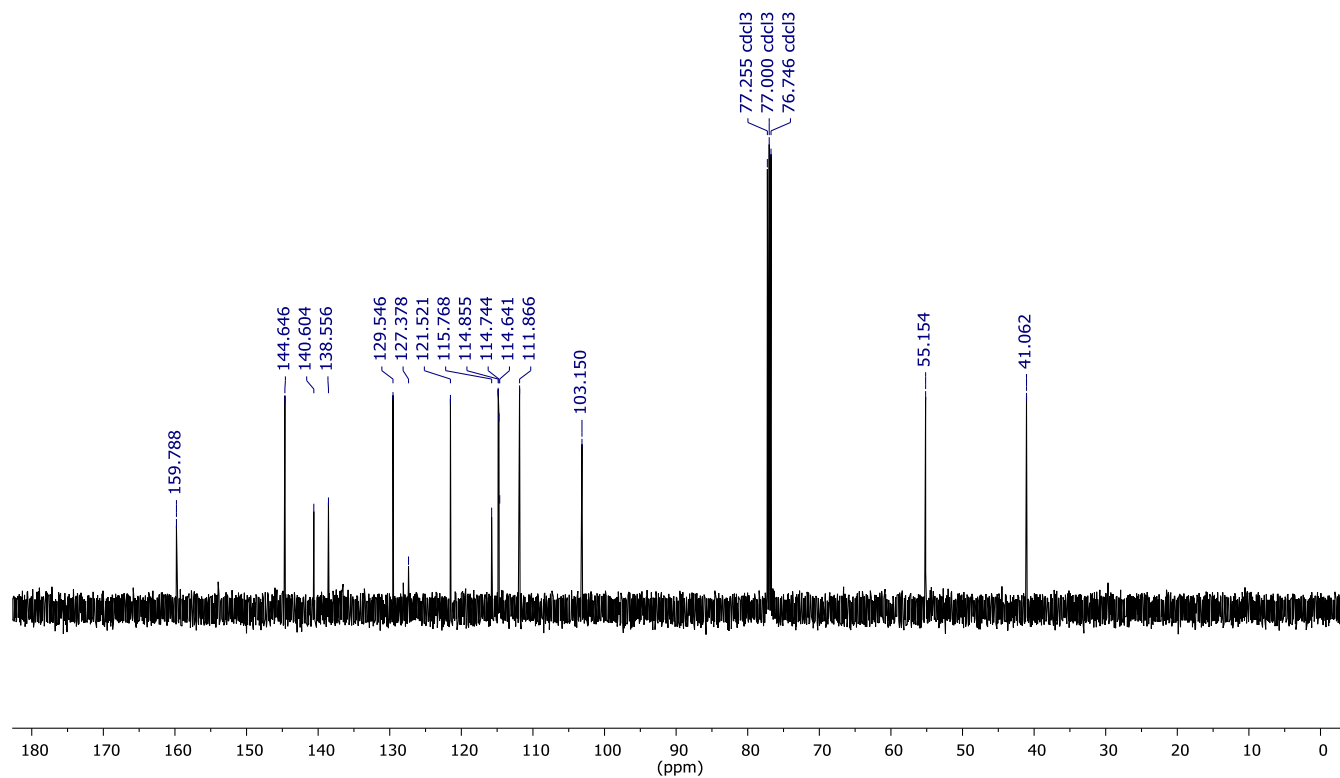

$^{13}\text{C NMR}$  (125 MHz,  $\text{CDCl}_3$ ) of compound **14g**.

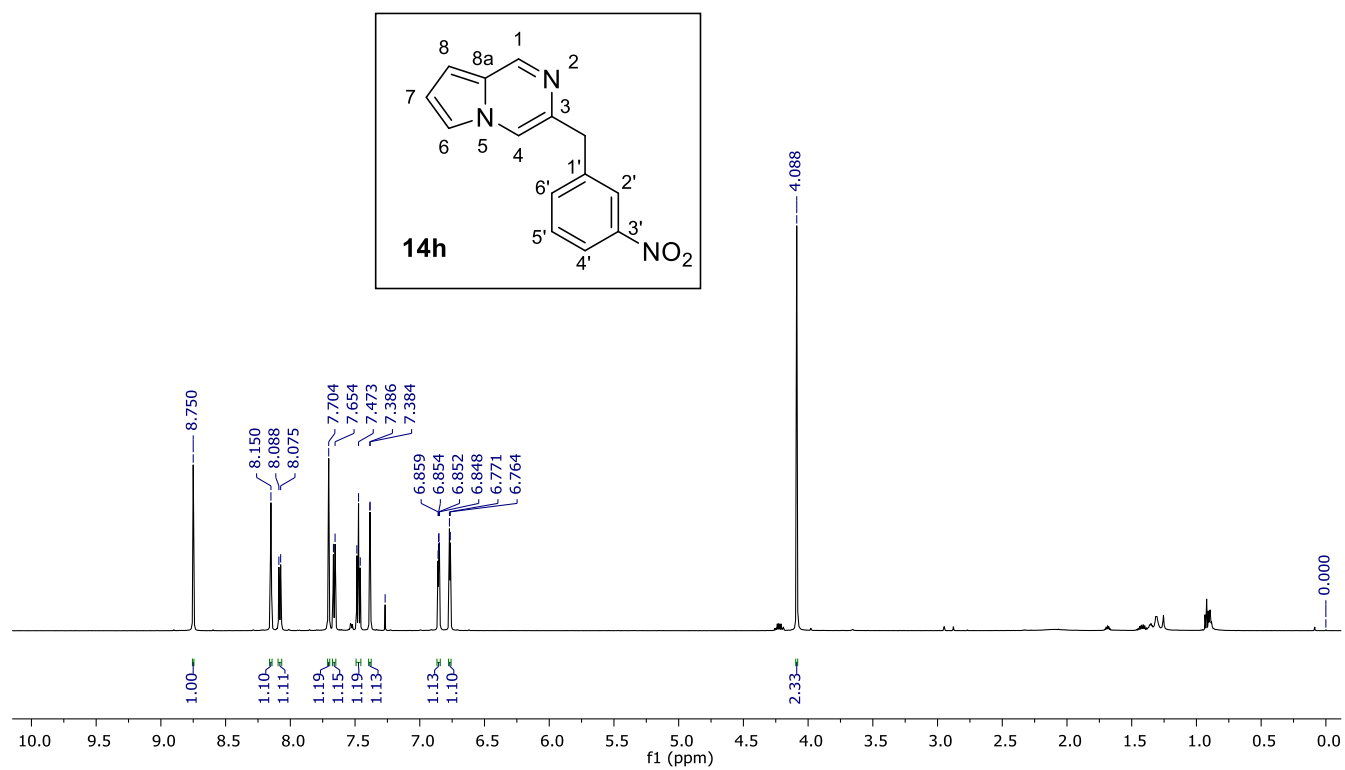

$^1\text{H}$  NMR (600 MHz,  $\text{CDCl}_3$ ) of compound **14h**.

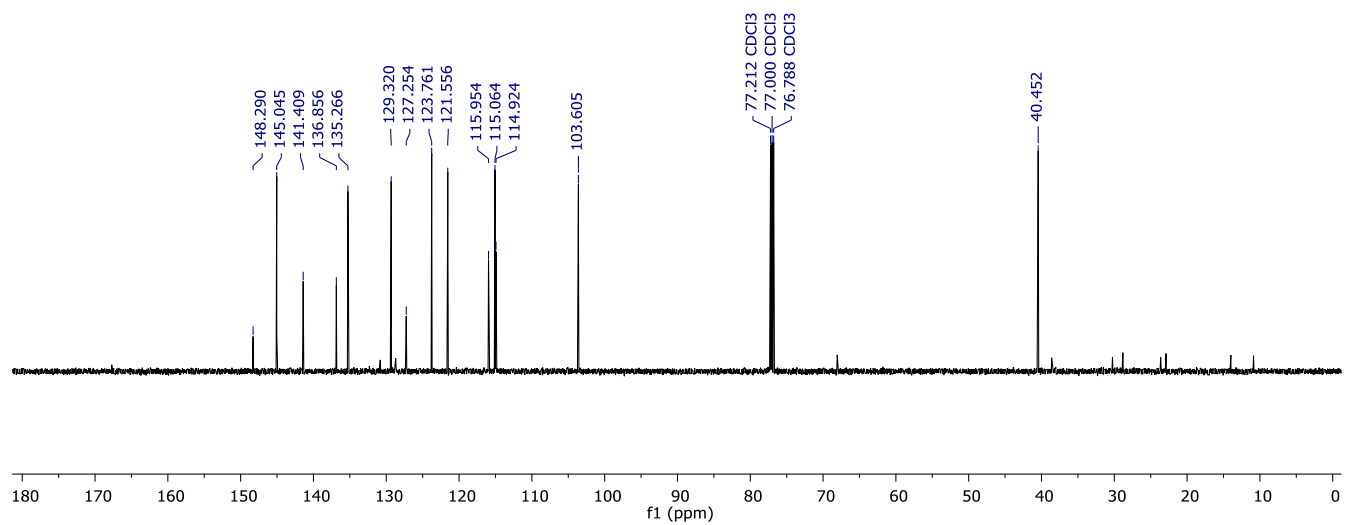

$^{13}\text{C}$  NMR (150 MHz,  $\text{CDCl}_3$ ) of compound **14h**.

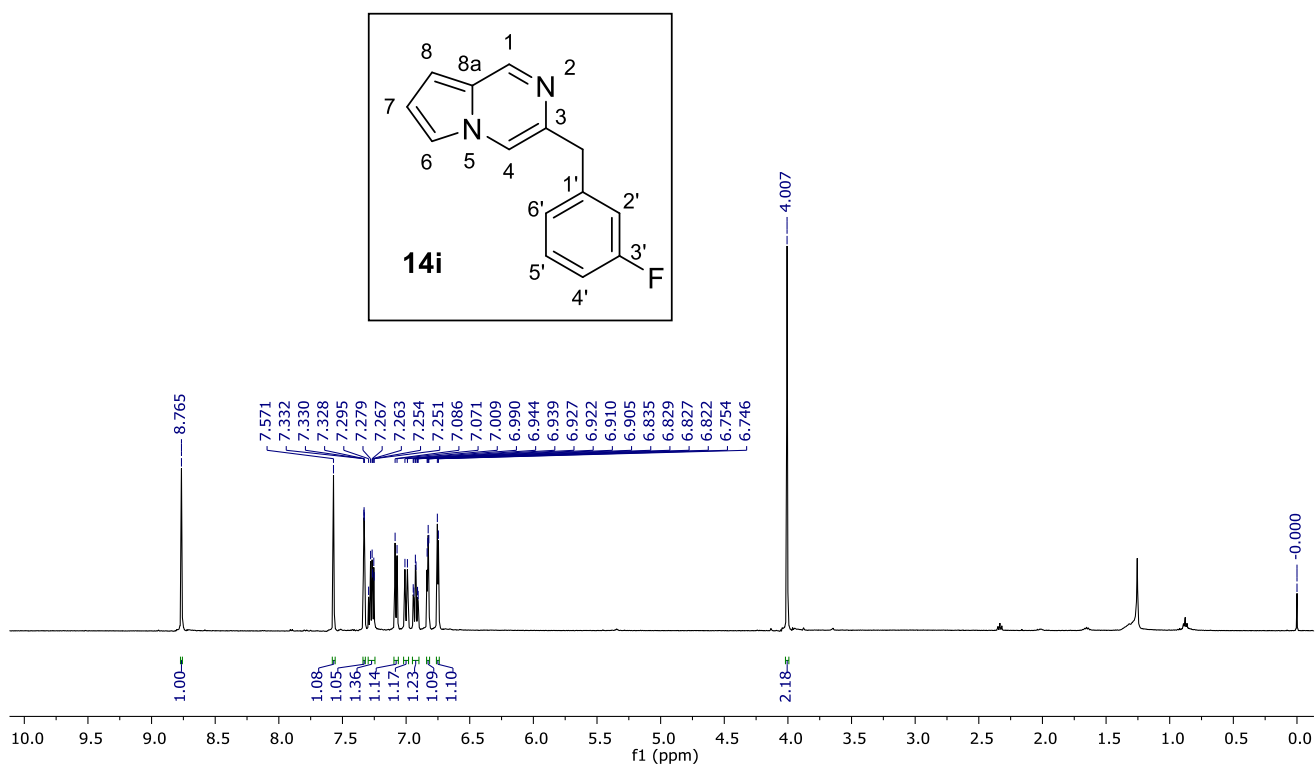

<sup>1</sup>H NMR (500 MHz, CDCl<sub>3</sub>) of compound **14i**.

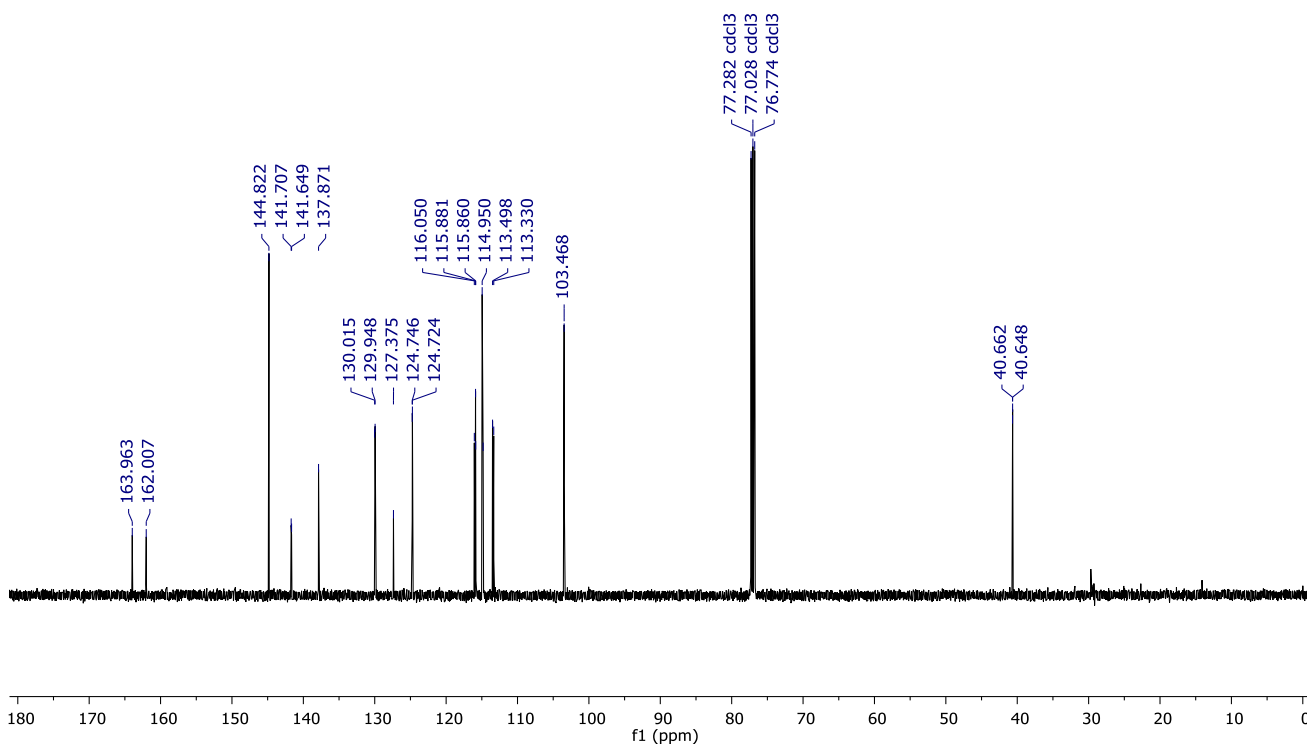

<sup>13</sup>C NMR (125 MHz, CDCl<sub>3</sub>) of compound **14i**.

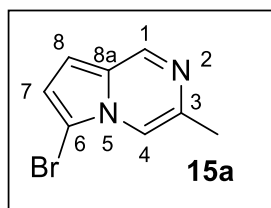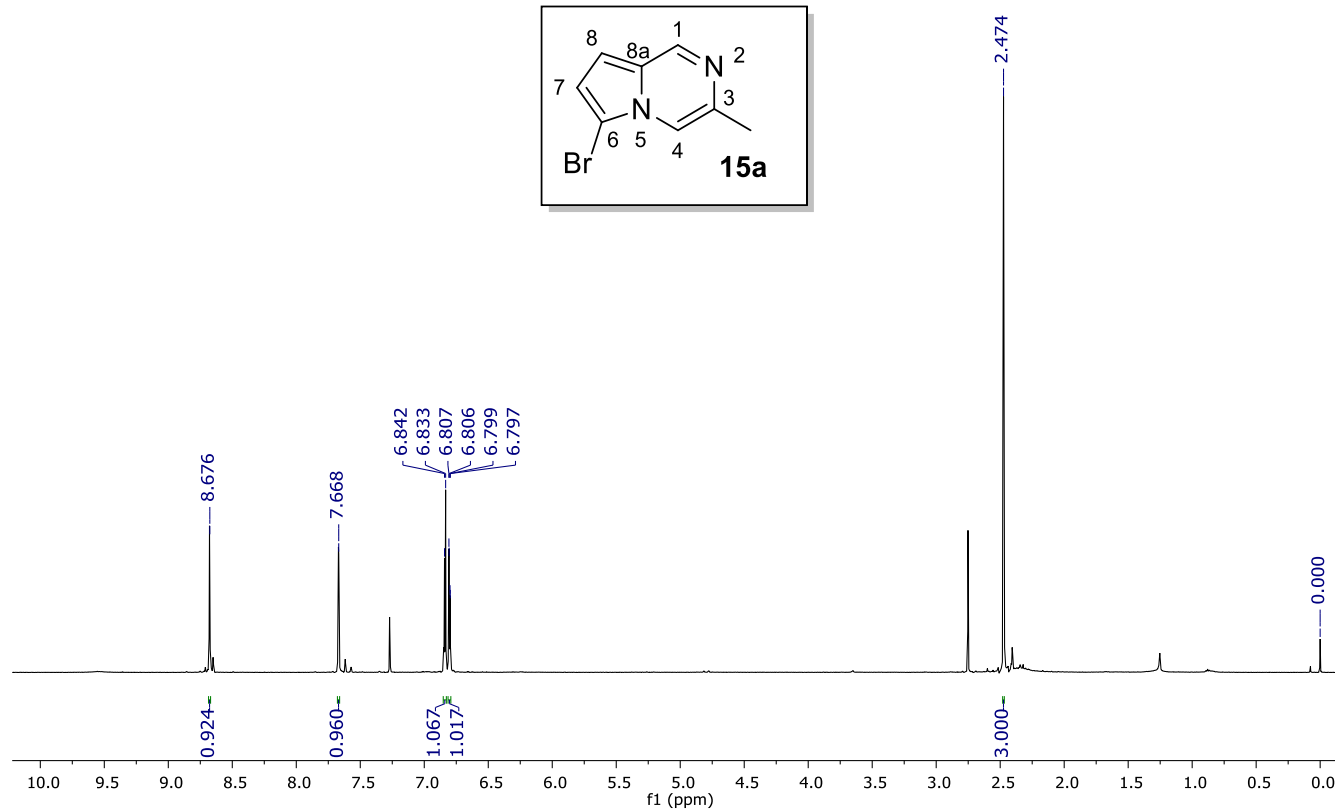

$^1\text{H}$  NMR (500 MHz,  $\text{CDCl}_3$ ) of compound **15a**.

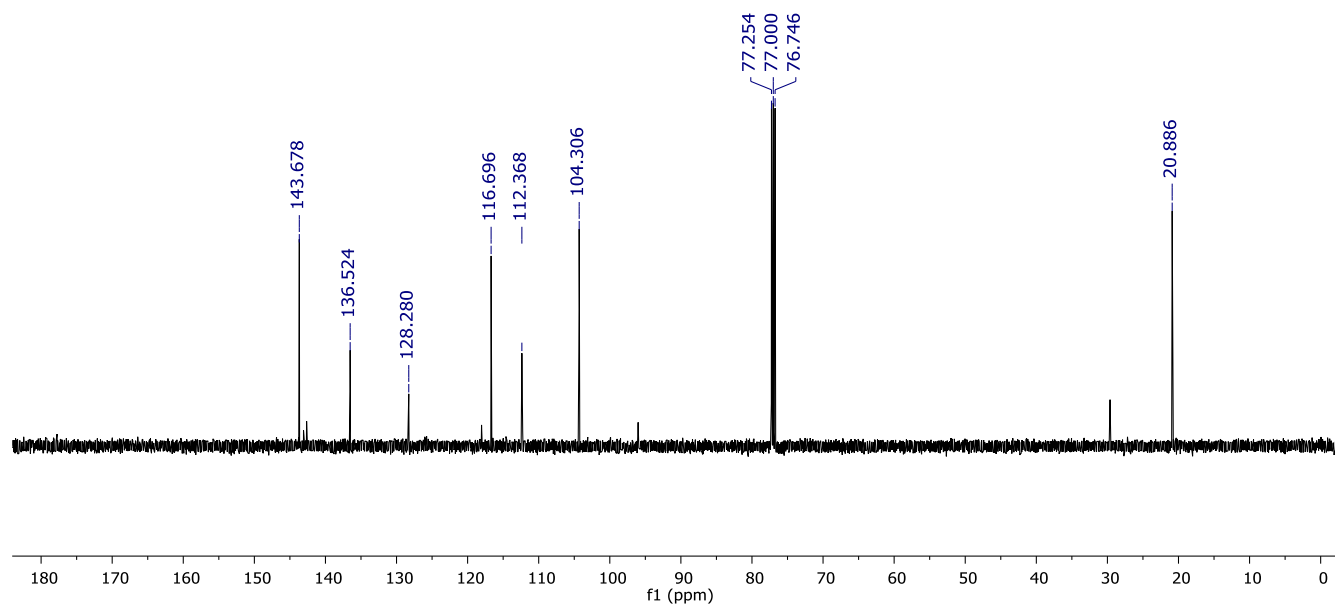

$^{13}\text{C}$  NMR (125 MHz,  $\text{CDCl}_3$ ) of compound **15a**.

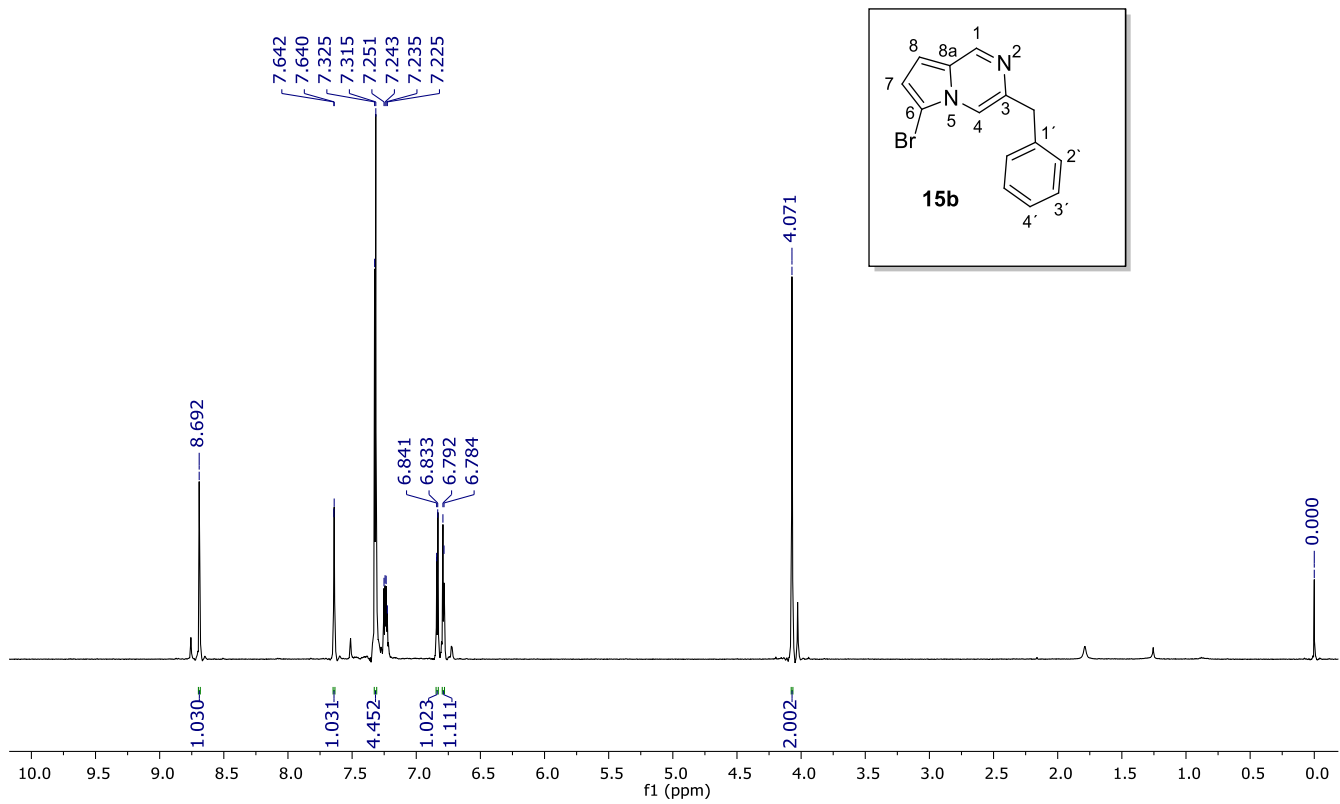

$^1\text{H}$  NMR (500 MHz,  $\text{CDCl}_3$ ) of compound **15b**.

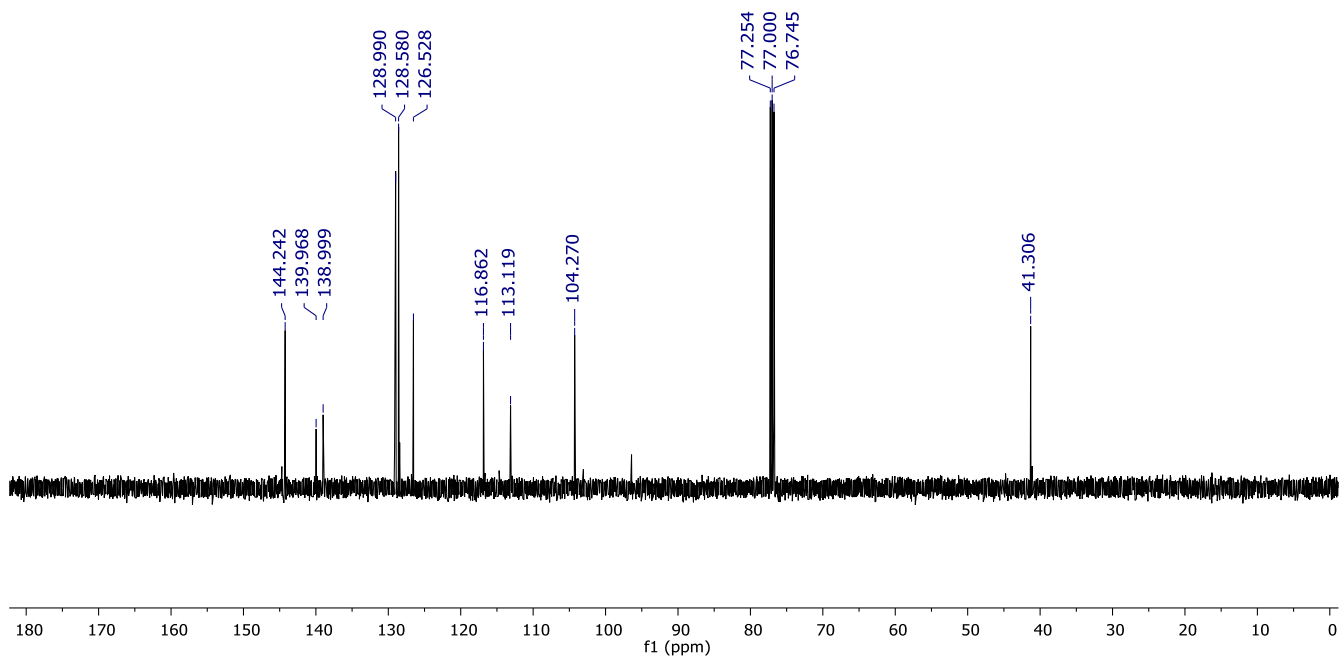

$^{13}\text{C}$  NMR (125 MHz,  $\text{CDCl}_3$ ) of compound **15b**.

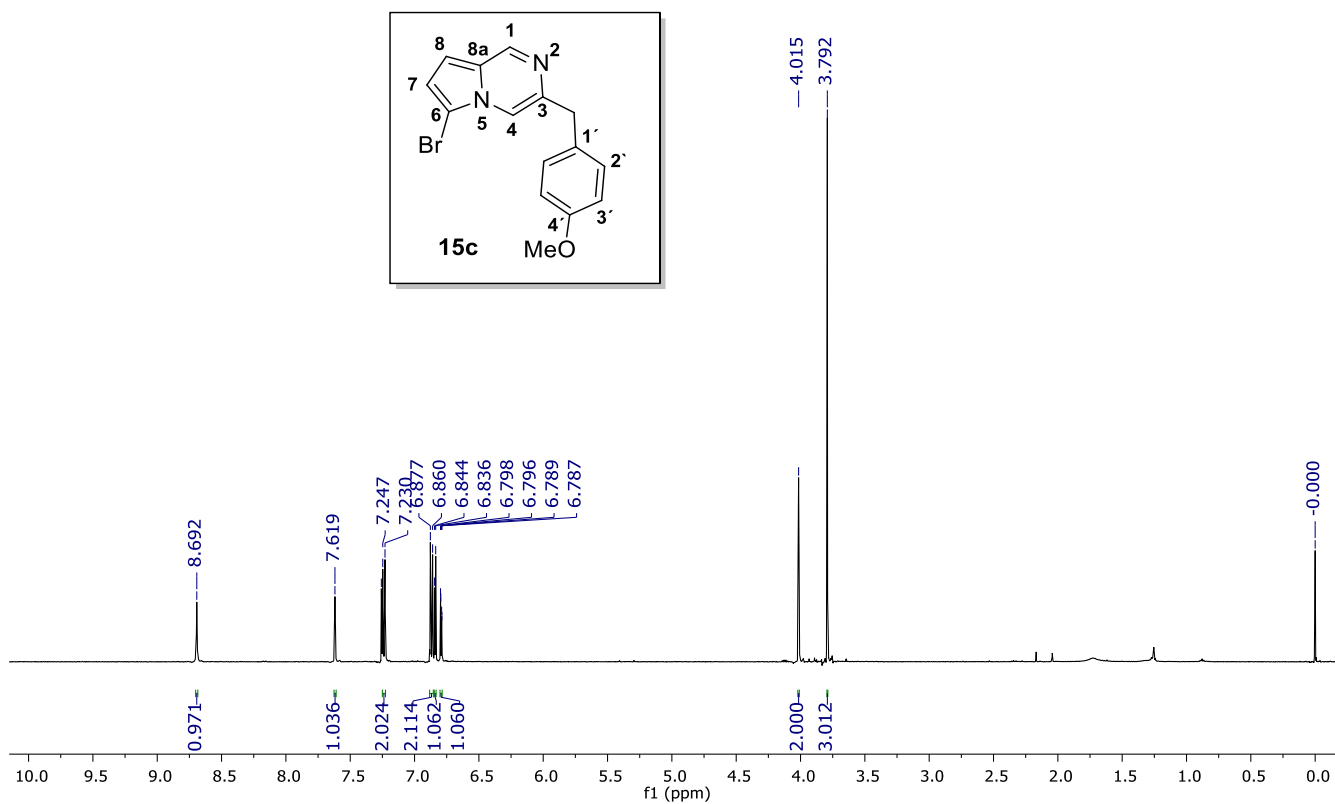

<sup>1</sup>H NMR (500 MHz, CDCl<sub>3</sub>) of compound **15c**.

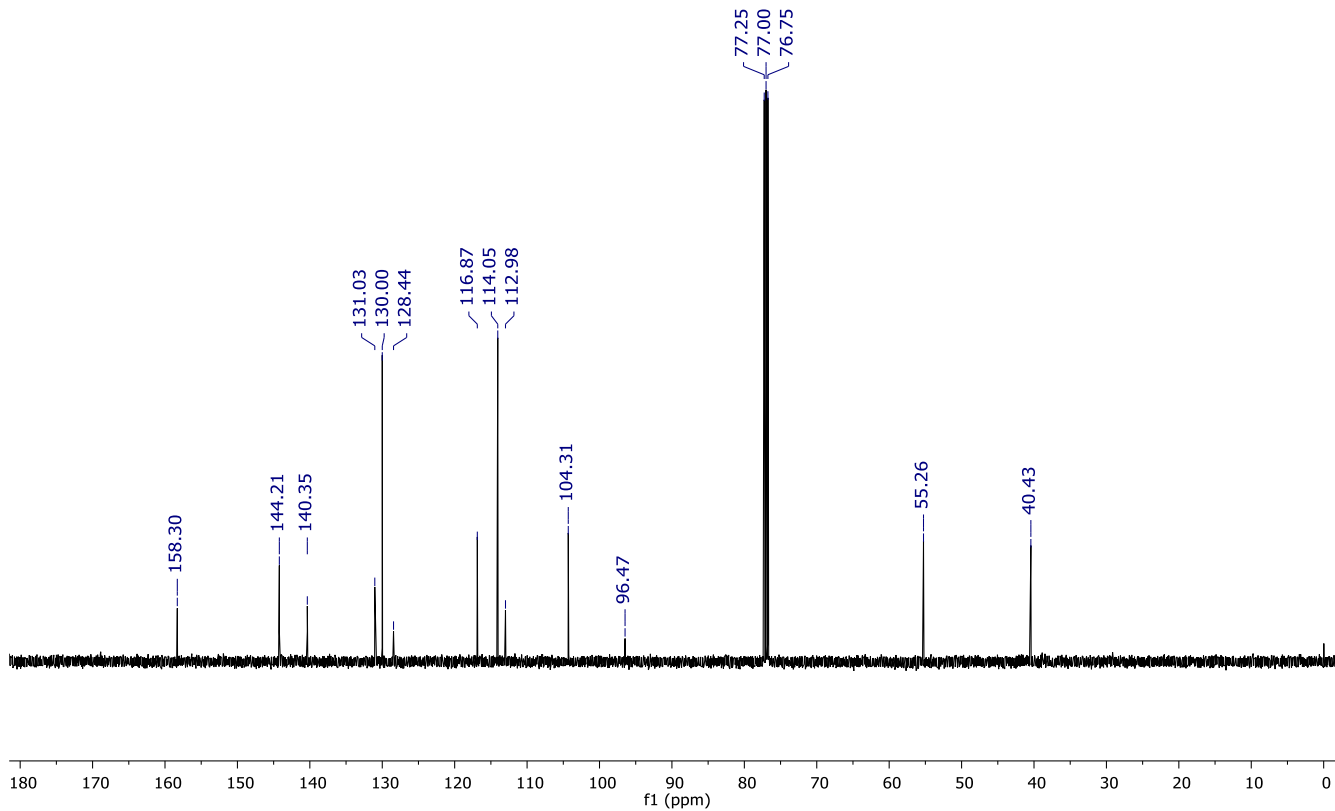

<sup>13</sup>C NMR (125 MHz, CDCl<sub>3</sub>) of compound **15c**.



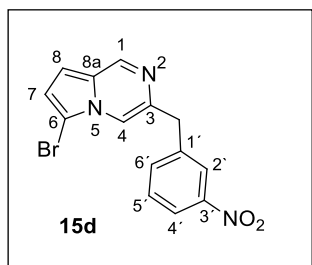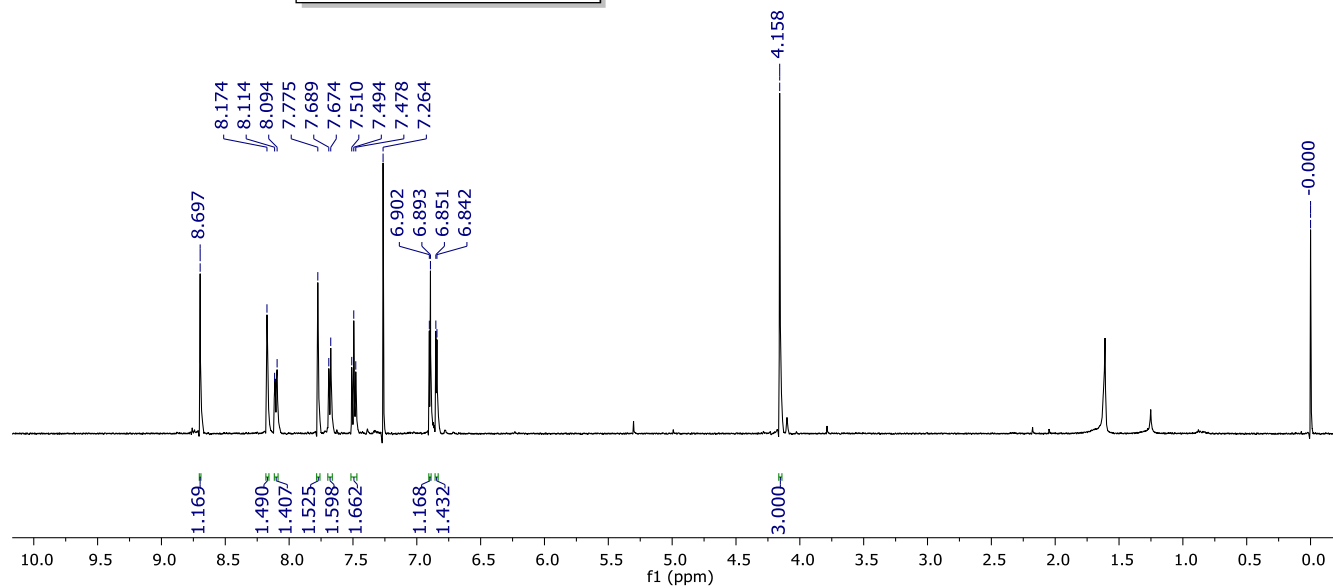

<sup>1</sup>H NMR (500 MHz, CDCl<sub>3</sub>) of compound **15d**.

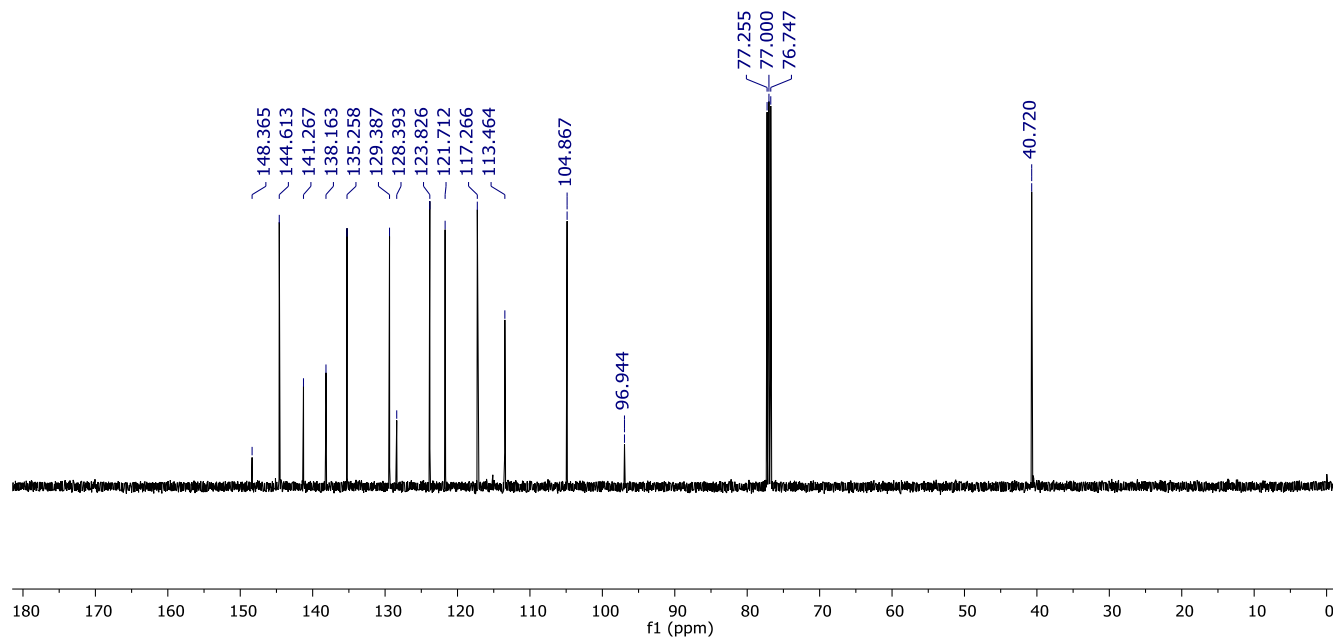

<sup>13</sup>C NMR (125 MHz, CDCl<sub>3</sub>) of compound **15d**.

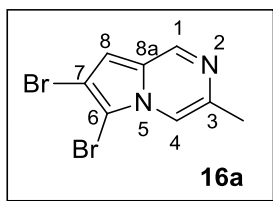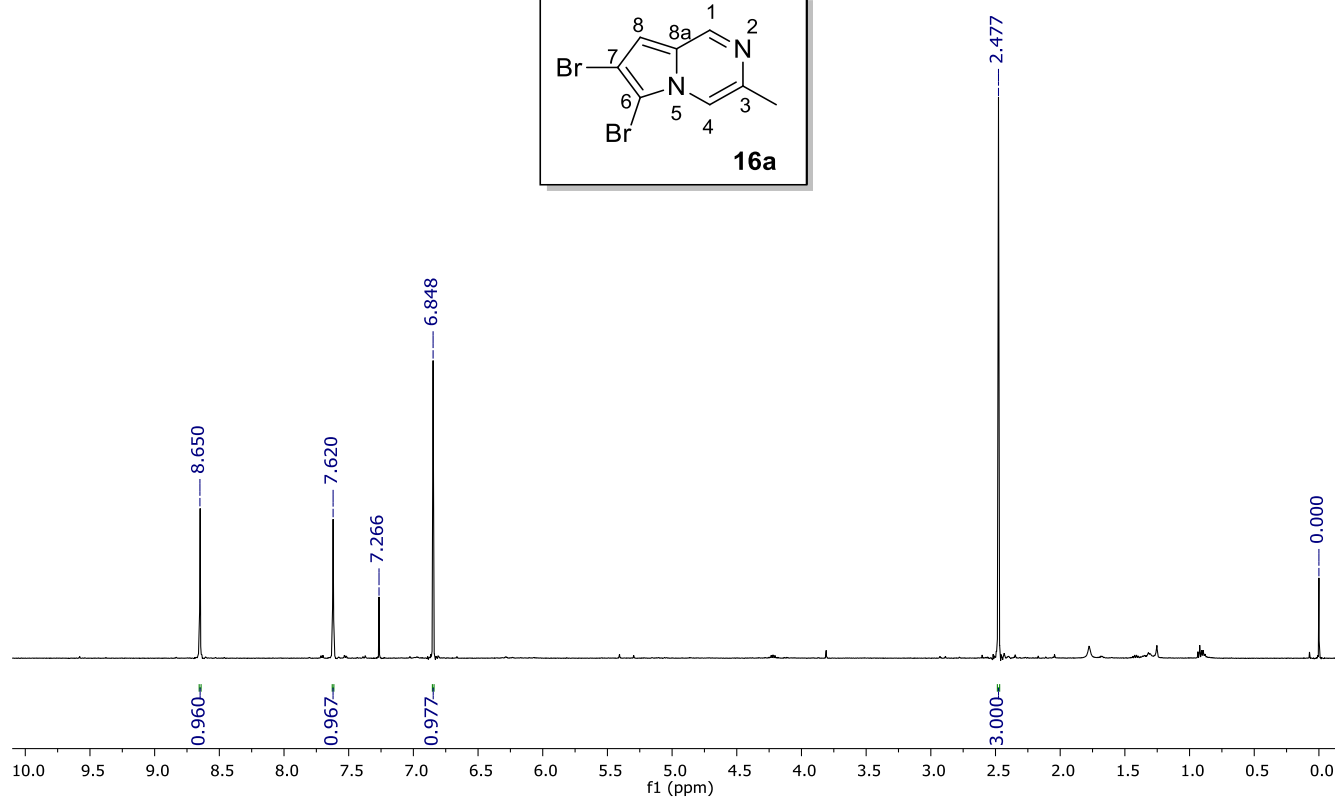

$^1\text{H}$  NMR (500 MHz,  $\text{CDCl}_3$ ) of compound **16a**.

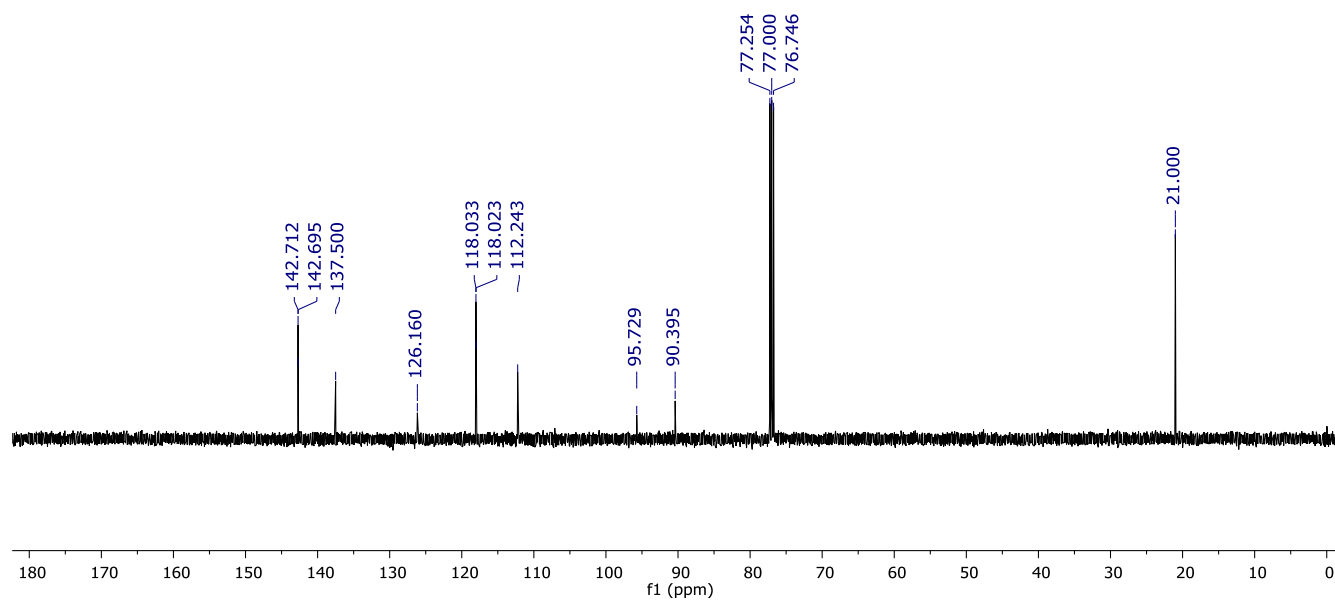

$^{13}\text{C}$  NMR (125 MHz,  $\text{CDCl}_3$ ) of compound **16a**.

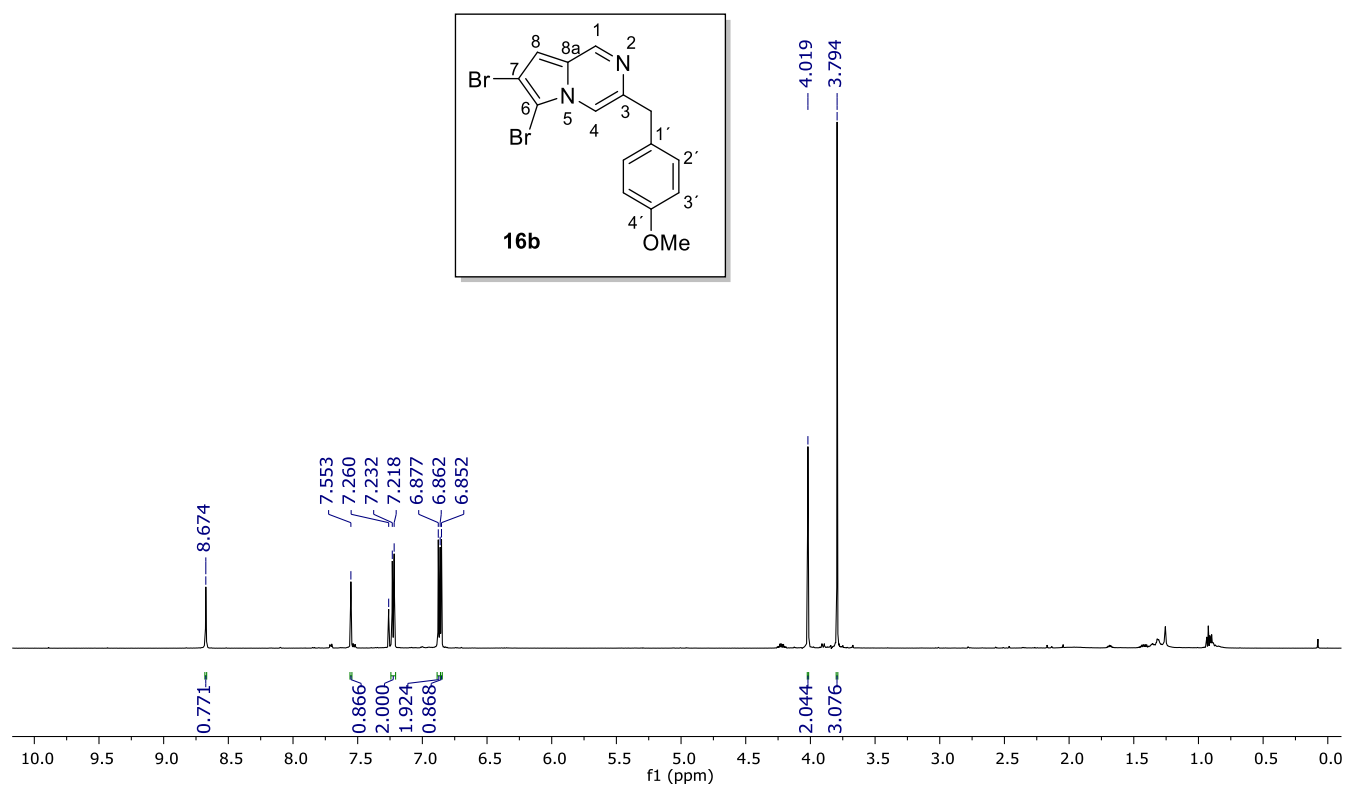

$^1\text{H}$  NMR (600 MHz,  $\text{CDCl}_3$ ) of compound **16b**.

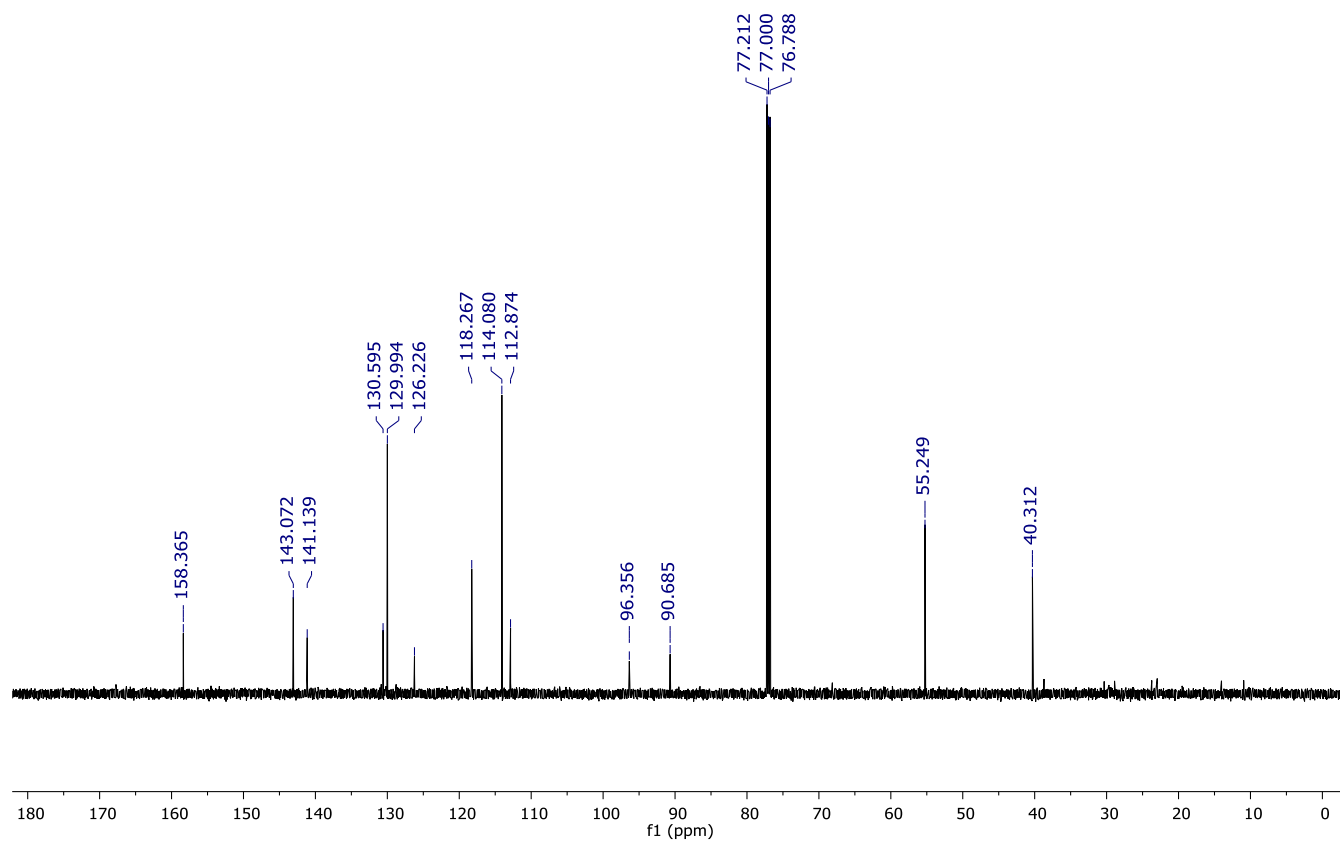

$^{13}\text{C}$  NMR (150 MHz,  $\text{CDCl}_3$ ) of compound **16b**.

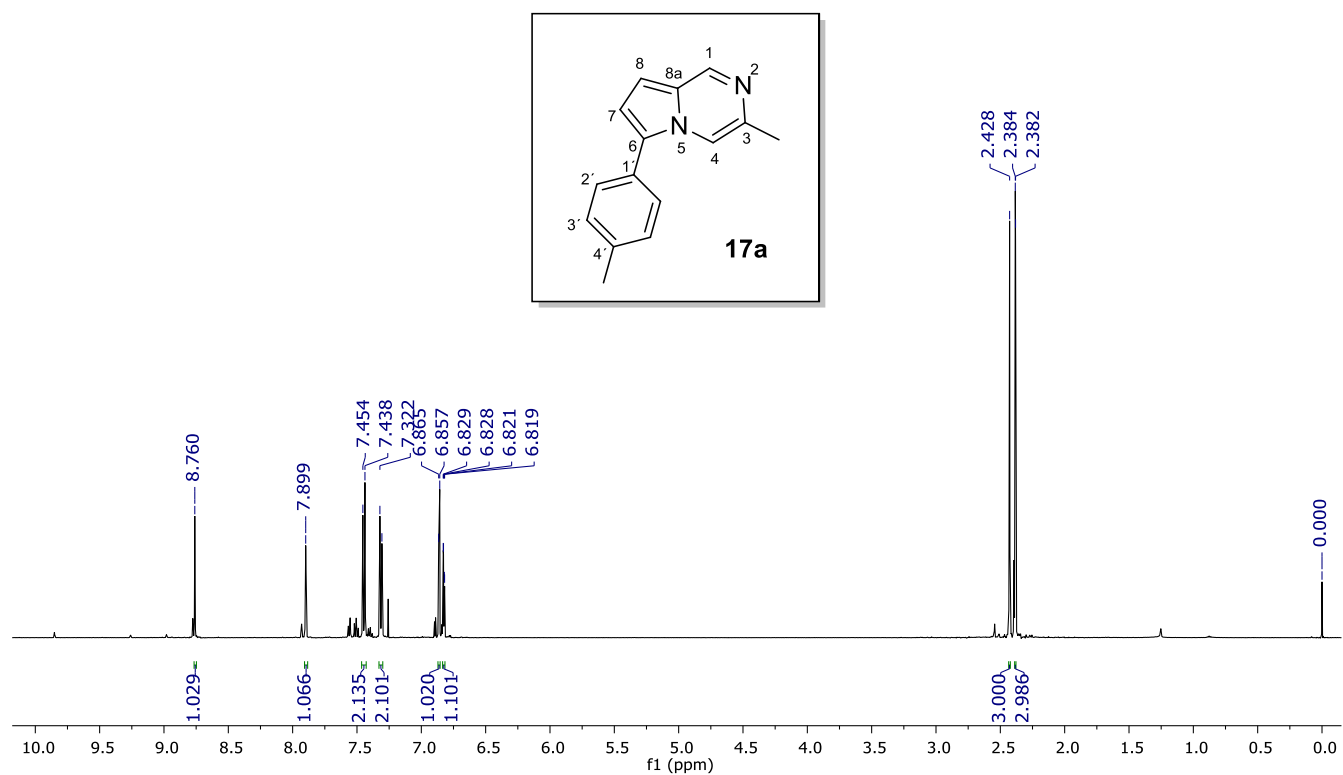

$^1\text{H}$  NMR (500 MHz,  $\text{CDCl}_3$ ) of compound **17a**.

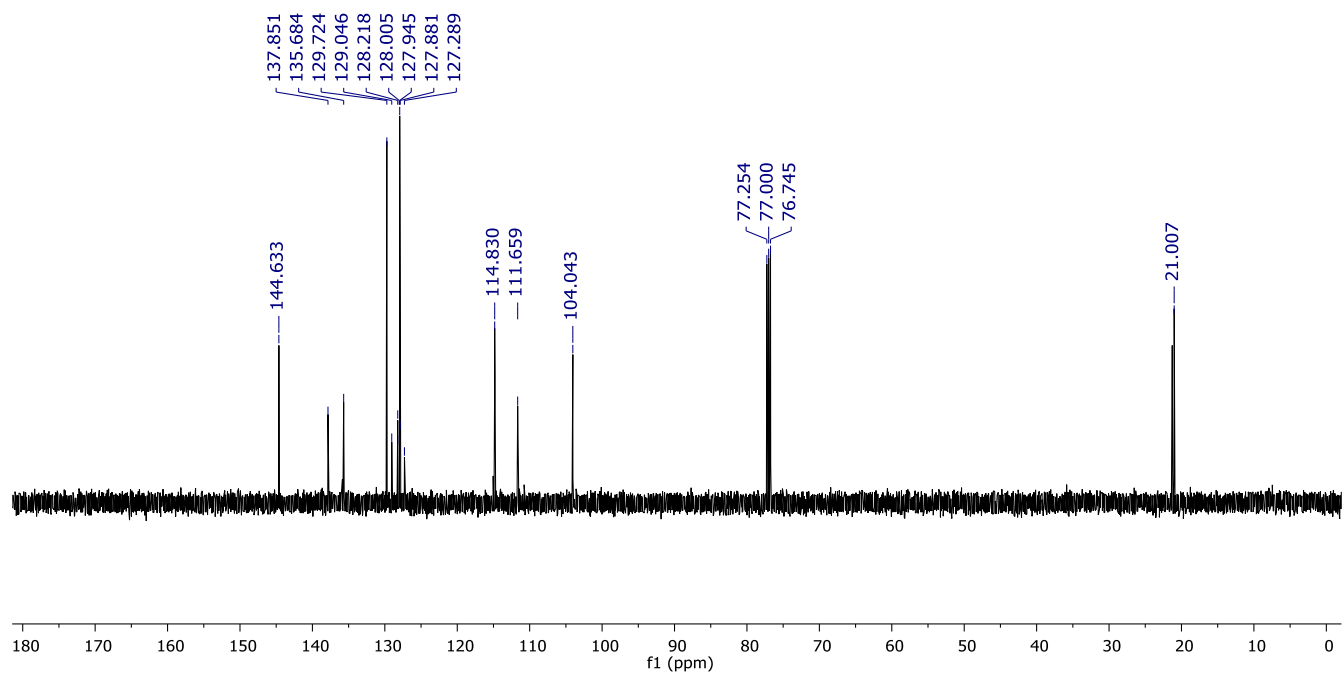

$^{13}\text{C}$  NMR (125 MHz,  $\text{CDCl}_3$ ) of compound **17a**.

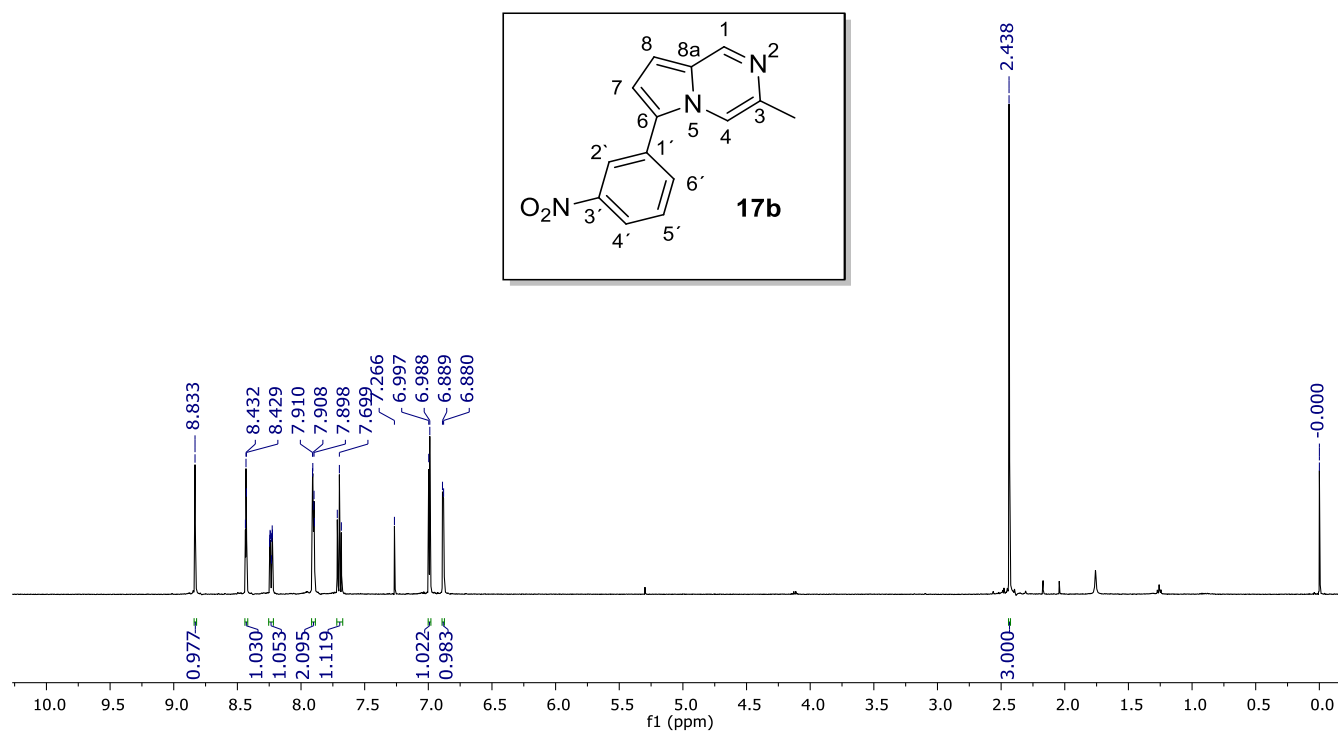

<sup>1</sup>H NMR (500 MHz, CDCl<sub>3</sub>) of compound **17b**.

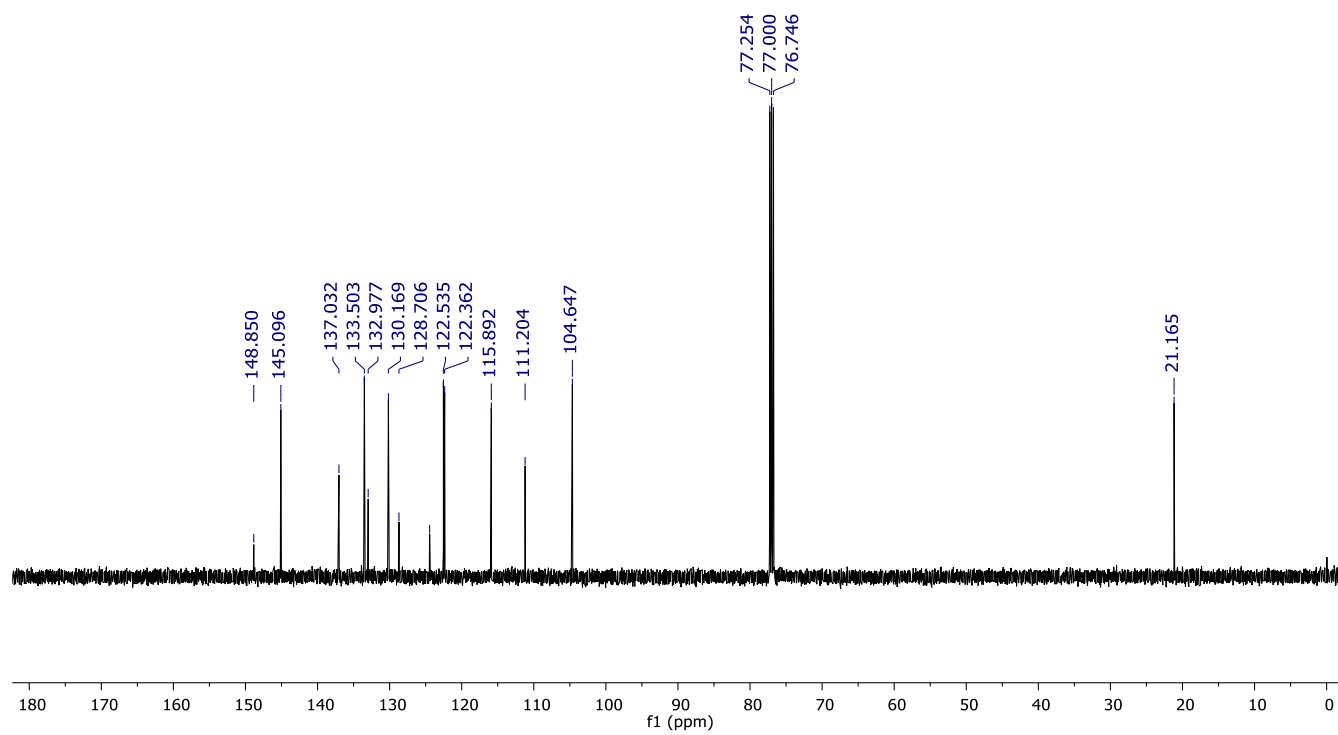

<sup>13</sup>C NMR (125 MHz, CDCl<sub>3</sub>) of compound **17b**.

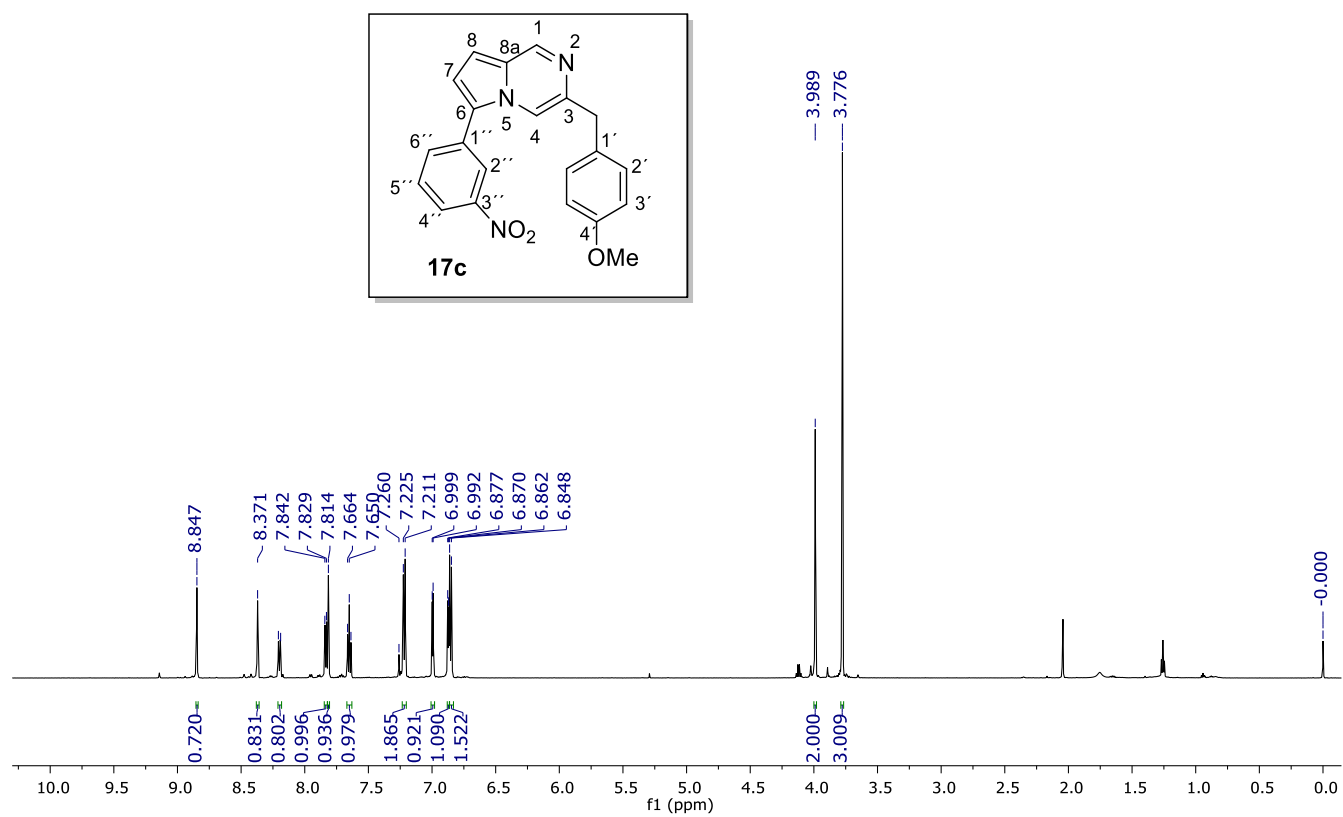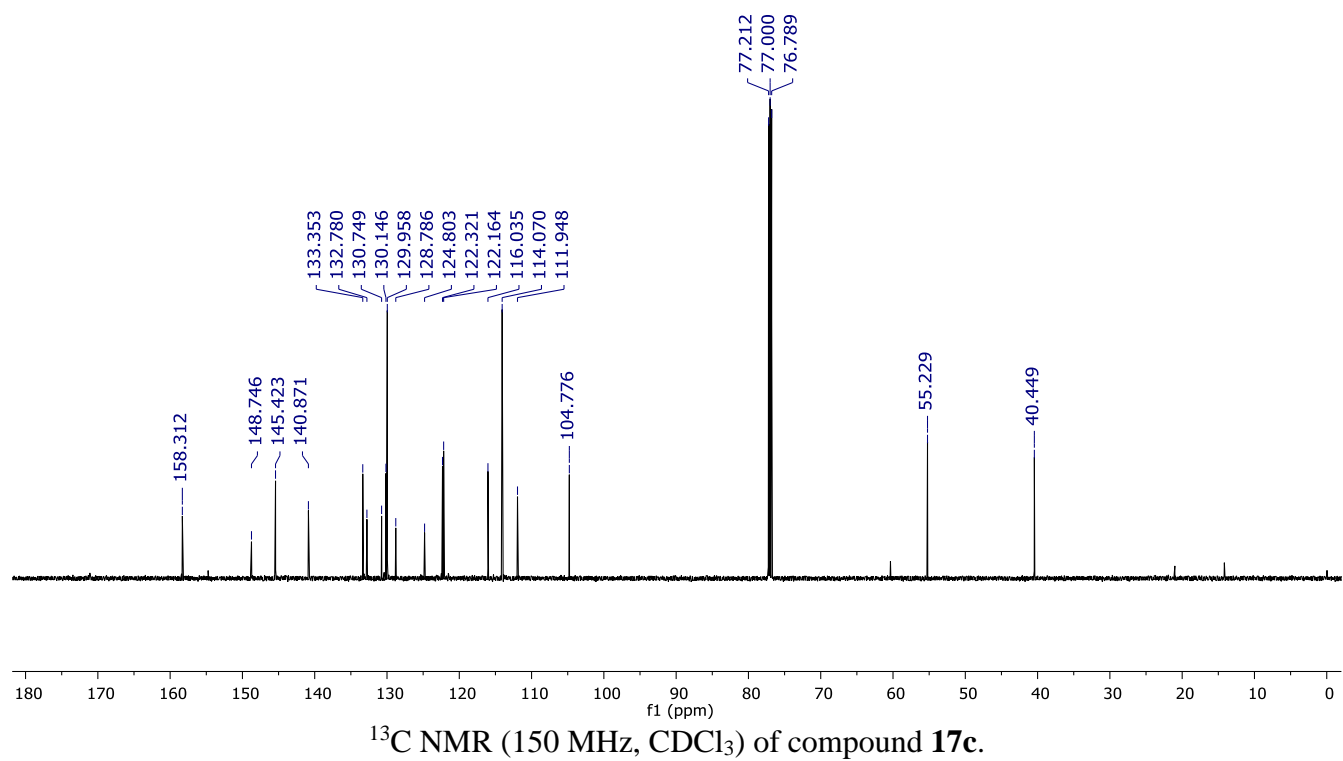

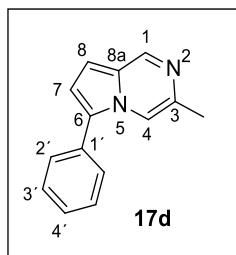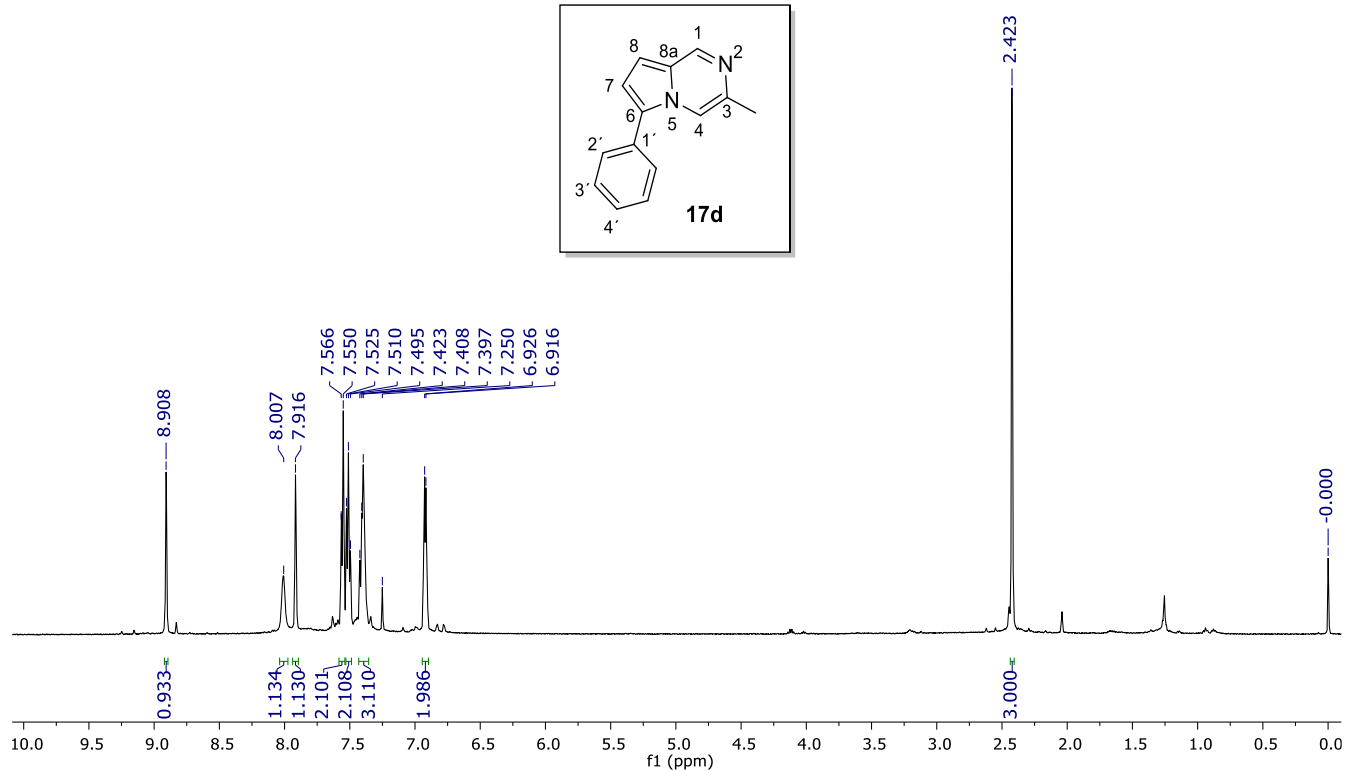

$^1\text{H}$  NMR (500 MHz,  $\text{CDCl}_3$ ) of compound **17d**.

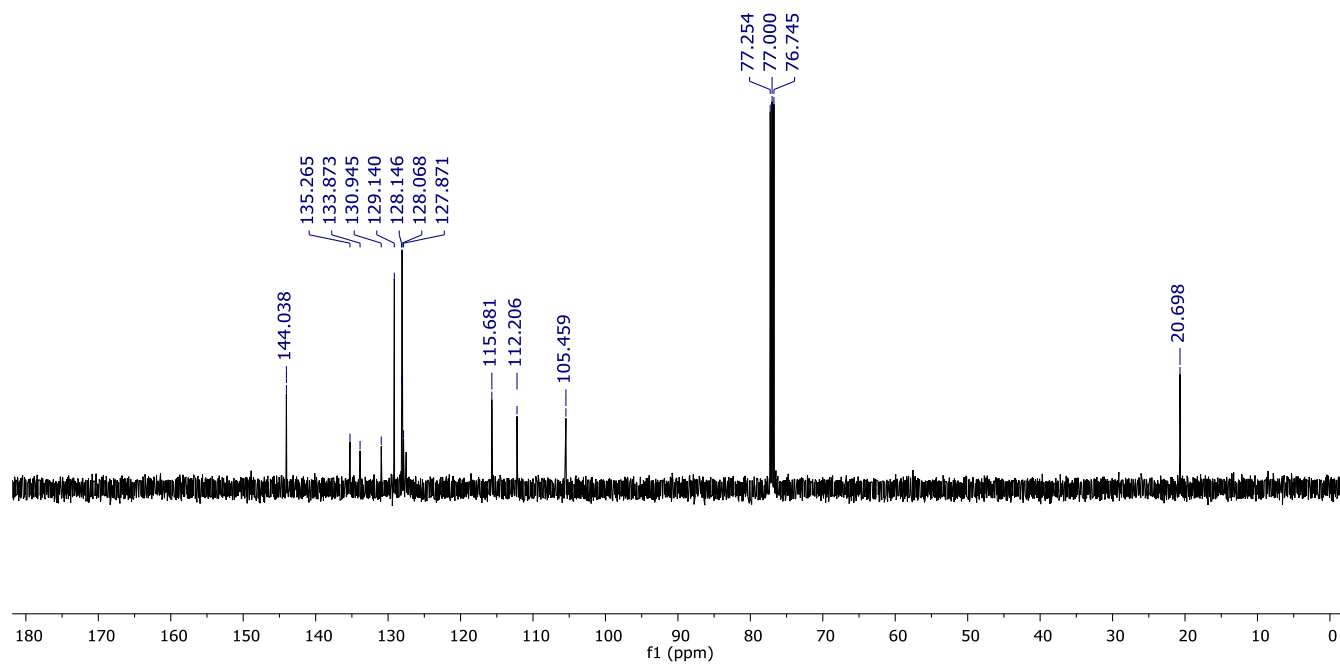

$^{13}\text{C}$  NMR (125 MHz,  $\text{CDCl}_3$ ) of compound **17d**.

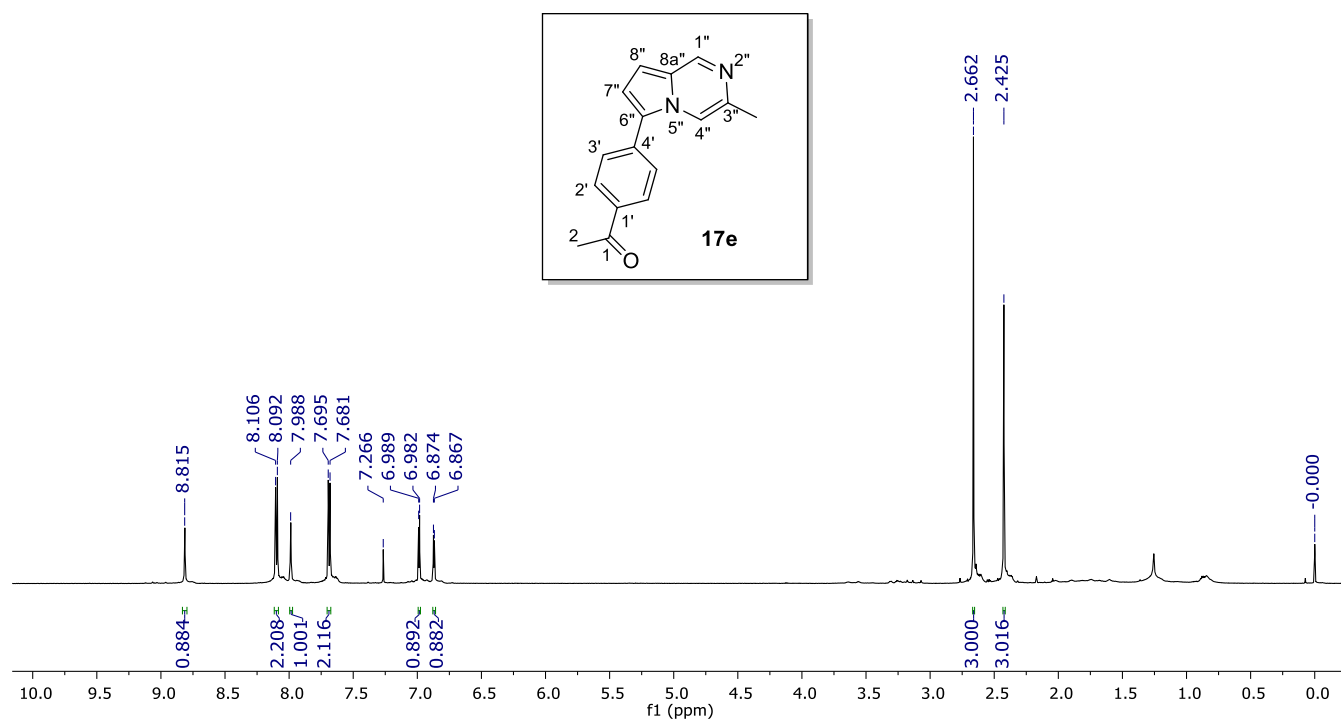

$^1\text{H}$  NMR (500 MHz,  $\text{CDCl}_3$ ) of compound **17e**.

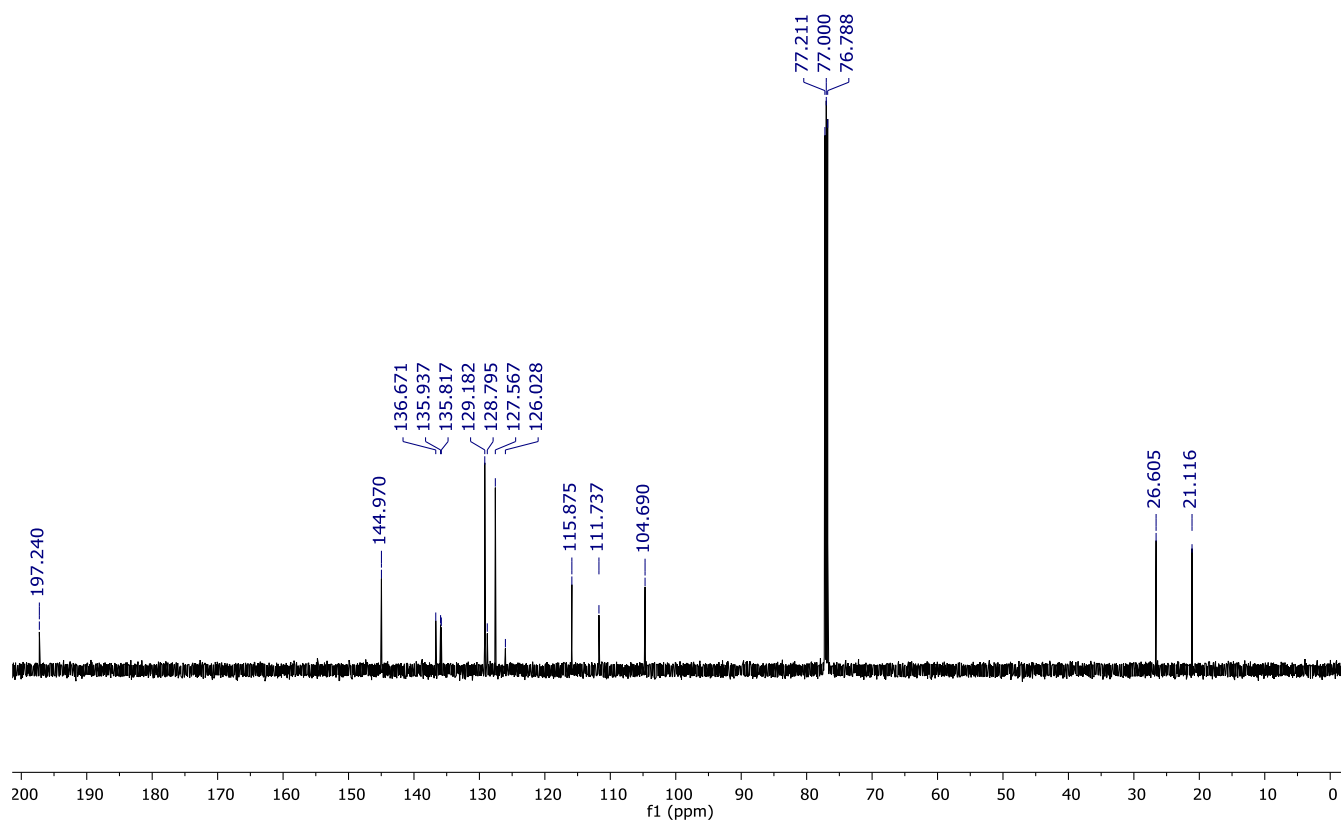

$^{13}\text{C}$  NMR (125 MHz,  $\text{CDCl}_3$ ) of compound **17e**.



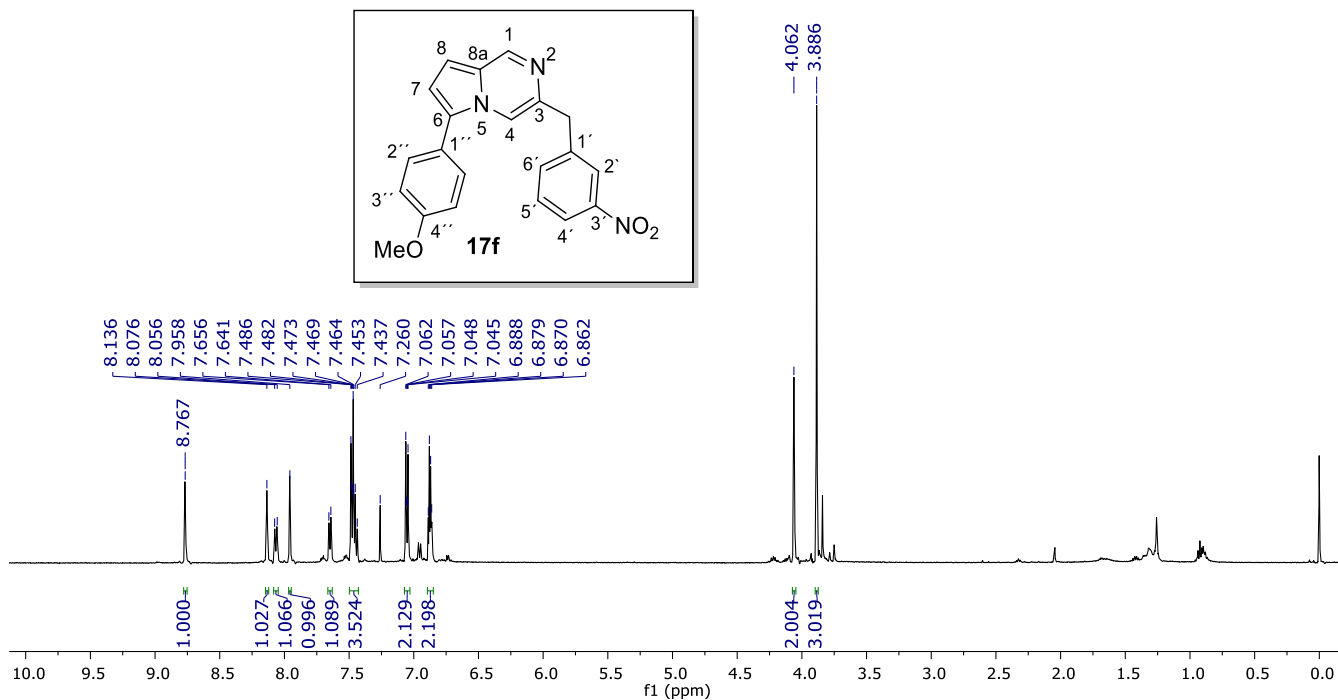

**<sup>1</sup>H NMR (500 MHz, CDCl<sub>3</sub>) of compound 17f.**

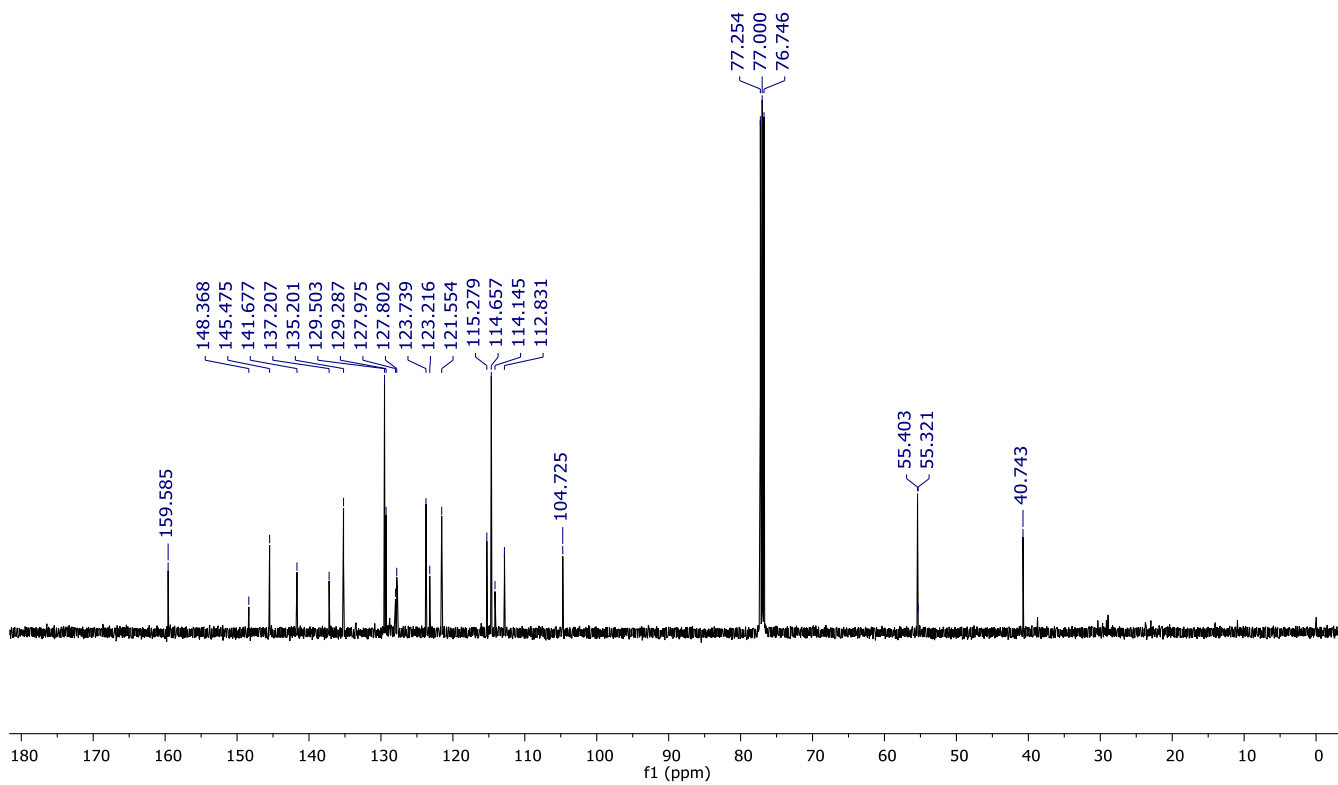

**<sup>13</sup>C NMR (125 MHz, CDCl<sub>3</sub>) of compound 17f.**
